# Supplementary material for: Rh-catalyzed intramolecular sp2 C–H bond difluoromethylenation
Source: Royal Society of Chemistry journal article supplement (doi:10.1039/c2cc30207a), 2012-01-01

**Supporting Information for**

**Rh-Catalyzed Intramolecular sp(2) C-H Bond**

**Difluoromethylenation**

**Yajun Li,<sup>ab</sup> Jiangtao Zhu,<sup>a</sup> Haibo Xie,<sup>a</sup> Shan Li,<sup>a</sup> Dongjie Peng,<sup>a</sup> Zhengke Li,<sup>a</sup>  
Yongming Wu<sup>\*a</sup> and Yuefa Gong<sup>\*b</sup>**

## General Information

Melting points were measured on a Melt-Temp apparatus and were uncorrected.  $^1\text{H}$  NMR spectra were recorded in  $\text{CDCl}_3$  on a Bruker AM-300 spectrometer (300 MHz) with TMS as internal standard.  $^{19}\text{F}$  NMR spectra were taken on a Bruker AM-300(282 MHz) spectrometer using  $\text{PhCF}_3$  as external standard.  $^{13}\text{C}$  NMR spectra were taken a Bruker AM-400(100 MHz) spectrometer. IR spectra were obtained with a Nicolet AV-360 spectrophotometer. Mass spectra and elemental analyses were recorded in this institute. Solvents were purchased from commercial sources and purified before used by standard procedures. Unless otherwise specified, all reactions were carried out under a nitrogen atmosphere in a flame-dried Schlenk tube and magnetic stirring. TLC analysis was performed on silica gel plates, column chromatography over silica gel (mesh 300-400) and petroleum ethyl acetate combination was used as the eluent.

2-aryl indoles were prepared by Fischer indole synthesis. 2-aryl pyrroles<sup>1</sup> were prepared according to literature. Substrate **3f**<sup>2</sup> was prepared according to literature.

### Synthesis of N-(2-bromo-2, 2-difluoro-1-(2-phenyl-1H-indol-1-yl) ethylidene)-4-methoxyaniline **1a** and Analogues

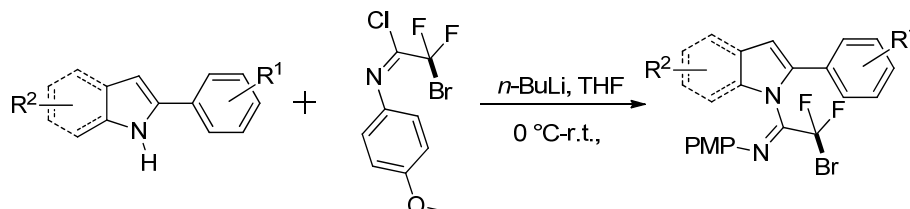

General procedure: A solution of 2-Phenyl indole (3.6 mmol) in THF (3 ml) was stirred at 0 °C for 10 min, and then *n*-BuLi (3.6 mmol) was added dropwise in 20 min. The mixture was stirred at 0 °C for another 1h before 2-bromo-2, 2-difluoro-N-(4-methoxyphenyl)acetimidoyl chloride (3 mmol) in THF (3 ml) was added dropwise. Then the mixture was stirred overnight at room temperature. To the mixture saturated ammonium chloride solution was added, then extracted with ethyl acetate, and dried over anhydrous magnesium sulfate. After filtration the resulting solution was evaporated *in vacuo* and the crude residue was purified by column chromatography (ethyl acetate and petrol ether) to give **1a** as a yellow solid (91%).

### Scheme S1. Structures and Yields of 1

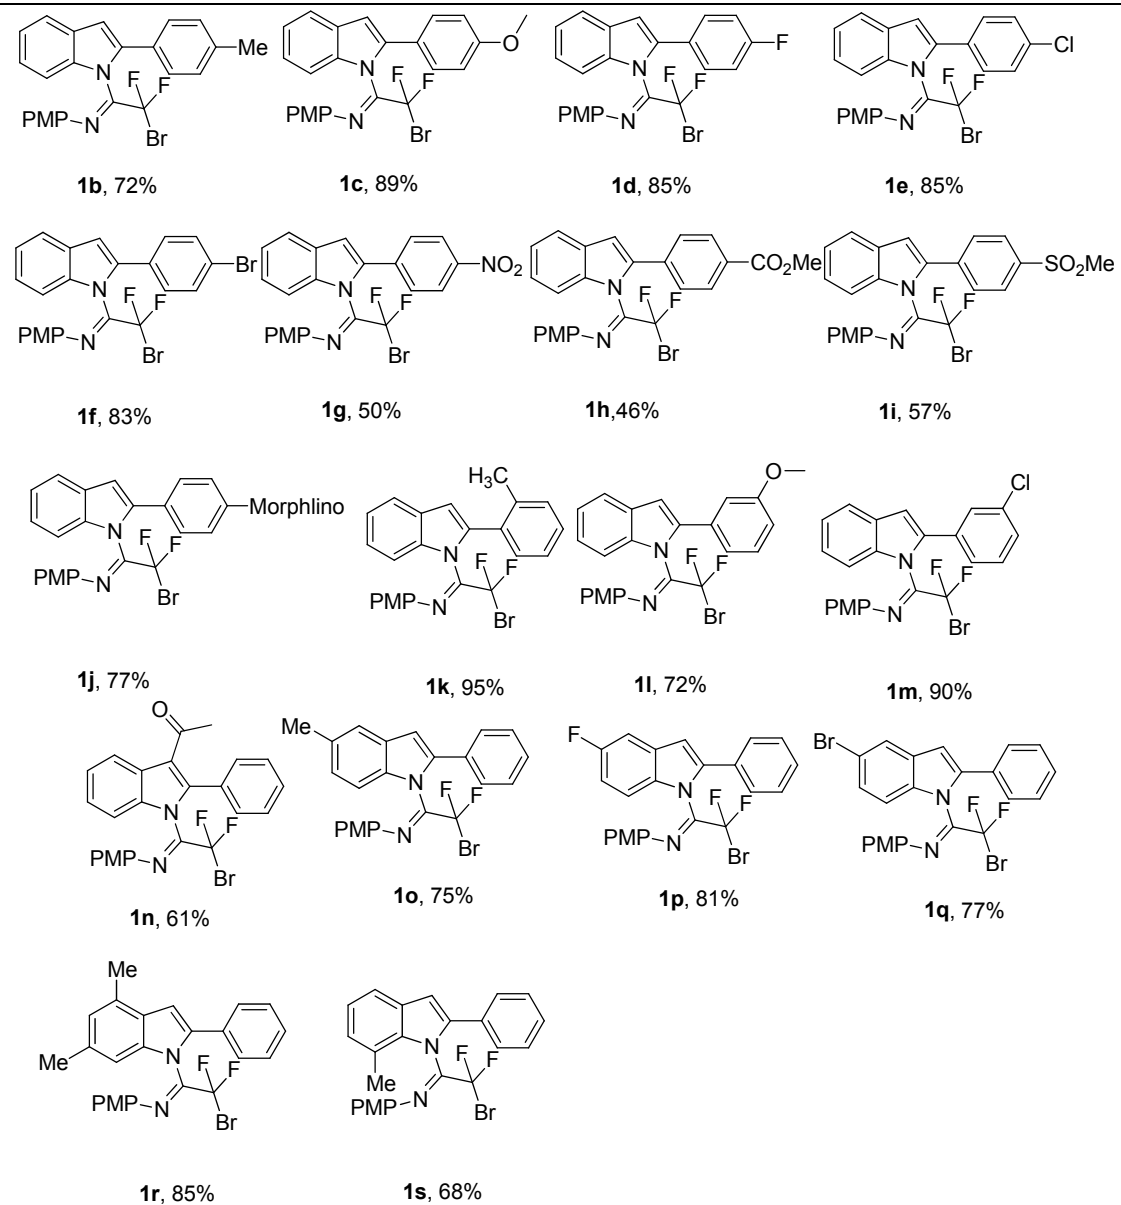

### Scheme S2. Structures and Yields of 3

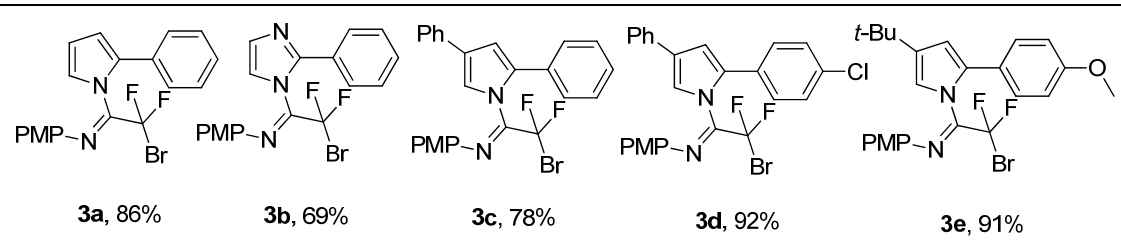

## General Procedure for Optimization of Intramolecular C-H Bond Difluoromethylation of **1a**

Rh(PPh<sub>3</sub>)<sub>3</sub>Cl (5 mol%, 9.2mg), base (1 equiv.), and **1a** (0.2 mmol) were suspended in solvent (2 ml) in a Schlenk tube under nitrogen. The resulting mixture was stirred at 100 °C, and then detected directly by <sup>19</sup>F NMR without purification.

**Table 1.** Optimization of Intramolecular C-H Bond Difluoromethylation of **1a**<sup>a</sup>

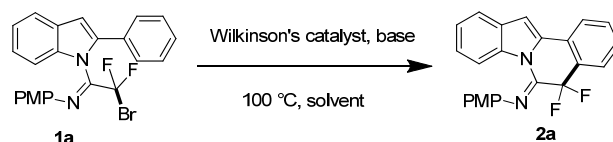

| Entry    | Solvent             | Base                                | Yield(%) <sup>b</sup>     |
|----------|---------------------|-------------------------------------|---------------------------|
| 1        | toluene             | Cs <sub>2</sub> CO <sub>3</sub>     | 58                        |
| 2        | toluene             | K <sub>2</sub> CO <sub>3</sub>      | 33                        |
| 3        | toluene             | K <sub>3</sub> PO <sub>4</sub>      | 10                        |
| 4        | toluene             | Et <sub>3</sub> N                   | 29                        |
| 5        | toluene             | DBU                                 | 5                         |
| 6        | toluene             | KOH                                 | 54                        |
| 7        | toluene             | Ag <sub>2</sub> CO <sub>3</sub>     | 62                        |
| <b>8</b> | <b>1, 4-dioxane</b> | <b>Ag<sub>2</sub>CO<sub>3</sub></b> | <b>99(94)<sup>c</sup></b> |
| 9        | DMF                 | Ag <sub>2</sub> CO <sub>3</sub>     | 33                        |
| 10       | DMSO                | Ag <sub>2</sub> CO <sub>3</sub>     | 12                        |
| 11       | CH <sub>3</sub> CN  | Ag <sub>2</sub> CO <sub>3</sub>     | 5                         |
| 12       | THF                 | Ag <sub>2</sub> CO <sub>3</sub>     | 74                        |
| 13       | 1, 4-dioxane        | Ag <sub>2</sub> CO <sub>3</sub>     | 15 <sup>d</sup>           |
| 14       | 1, 4-dioxane        | ---                                 | 13 <sup>e</sup>           |
| 15       | 1, 4-dioxane        | Ag <sub>2</sub> CO <sub>3</sub>     | 0 <sup>f</sup>            |

<sup>a</sup> General conditions: **1a** (0.2mmol), base(1 equiv.), RhCl(PPh<sub>3</sub>)<sub>3</sub> (5 mol %) in solvent at 100 °C. <sup>b</sup> Yields were based on **1a** determined by <sup>19</sup>F NMR. <sup>c</sup> Isolated yield in parenthesis. <sup>d</sup> Reaction temperature is 90 °C. <sup>e</sup> Without base. <sup>f</sup> In the absence of RhCl(PPh<sub>3</sub>)<sub>3</sub>.

The reaction was optimized with respect to solvent, base and temperature. As show in table 1, compared to K<sub>2</sub>CO<sub>3</sub> and K<sub>3</sub>PO<sub>4</sub>, Cs<sub>2</sub>CO<sub>3</sub> provided the most encouraging result in toluene (entries 1 vs. 2 and 3, Table 1), obtaining the product **2a** in up to 58% yield, which was confirmed by X-ray crystal diffraction studies. This effect may be due to the higher solubility of Cs<sub>2</sub>CO<sub>3</sub> in organic solvents. However, the organic bases, such as Et<sub>3</sub>N and DBU, were found not suitable for the reaction (entries 4 and 5, Table 1). When KOH was chosen as a base, it performed less efficiency than Cs<sub>2</sub>CO<sub>3</sub> (entry 6, Table 1). Interestingly, when Ag<sub>2</sub>CO<sub>3</sub> took place of Cs<sub>2</sub>CO<sub>3</sub>, 62% yield of **2a** was detected (entry 7, Table 1). The solvent was also screened. While the polar solvents such as DMF (entry 9, Table 1), DMSO (entry 10, Table 1) and CH<sub>3</sub>CN (entry 11, Table 1) couldn't improve the product yield, 1, 4-dioxane offered the highest yield (entry 8, Table 1). Neither the catalyst nor the base alone could give satisfied performance (entries 14, 15 vs. 1, Table 1). Surprisingly, decreasing the reaction temperature to 90 °C would significantly affect the product yield (entry 13, Table 1), that might be due to the energy barrier of this reaction. In the end, the final optimized conditions (5 mol % of RhCl(PPh<sub>3</sub>)<sub>3</sub>, 1 equiv. Ag<sub>2</sub>CO<sub>3</sub>, at 100 °C in 1, 4-dioxane for 2h) provided intramolecular C-H bond difluoromethylenated product **2a** in 94% isolated yield.

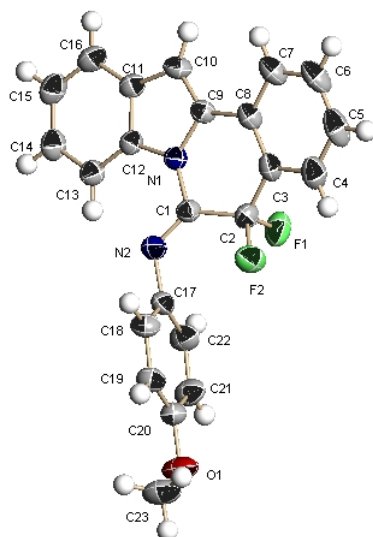

Figure 1. X-ray Crystal Structure of **2a**

### General procedure for the intramolecular difluoromethylation of 2-aryllindole

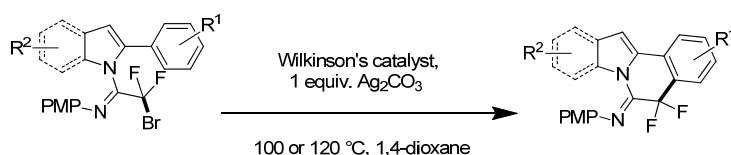

### Representative experimental procedure for the synthesis of **2a**

RhCl(PPh<sub>3</sub>)<sub>3</sub> (5 mol% , 9.2mg), Ag<sub>2</sub>CO<sub>3</sub> (1 equiv. 55.2mg), and **1a** (0.2 mmol) were suspended in 1, 4-dioxane (2 ml) in a Schlenk tube under nitrogen. The resulting mixture was stirred at 100 °C for 2h. After cooling to room temperature, the solution was filtered through a short path of silica gel, eluting with ethyl acetate. The volatile compounds were removed *in vacuo* and the crude residue was purified by column chromatography (ethyl acetate and petrol ether) to give **2a** as a yellow solid (94%).

### Hydrolysis of products **2a** and **4e**<sup>3</sup>

To a stirring solution of iminoethanones **2a** or **4e** (0.2 mmol) in THF (3 ml), 10% HCl (1 ml) was added. The reaction mixture was then stirred at room temperature for 10min and poured into water. The products were extracted with ethyl acetate, washed with brine, and dried over MgSO<sub>4</sub>. The solvent was evaporated and the residue was purified by silica gel column chromatography to obtain the products.

### Control Experiments and Mechanism Studies

#### Reaction under sulfinate dehalogenation reagent

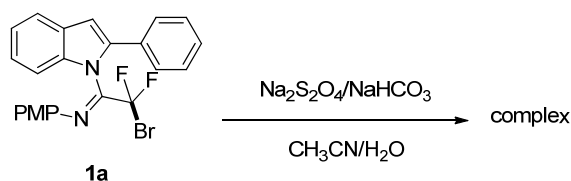

To a mixed solution of CH<sub>3</sub>CN and water (5:1, 2.4 ml) was added **1a** (0.5 mmol) under nitrogen,

Na<sub>2</sub>S<sub>2</sub>O<sub>4</sub>-NaHCO<sub>3</sub> mixture (1:1, 1.5 equiv.) was added partially. The resulting solution was stirred at room temperature for 5h. No corresponding product was detected.

#### Reaction under Fenton reagent

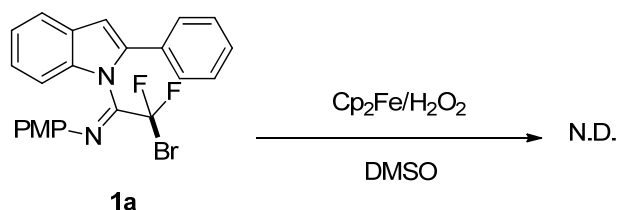

Substrate **1a** (0.2 mmol), Cp<sub>2</sub>Fe (9 mg, 0.05 mmol), and DMSO (2.0 mL) were charged in a two-neck flask in Ar atmosphere. Then, a 30% aqueous solution of H<sub>2</sub>O<sub>2</sub> (40  $\mu$ L) was added continuously over 5 min. The reaction solution was stirred at room temperature for 12 h, and then detected directly by <sup>19</sup>F NMR without purification.

#### Reaction using Hu's strategy

Under N<sub>2</sub> atmosphere, into a 10-mL Schlenk flask was added **1a** (92 mg, 0.2 mmol), Cu powder (25 mg, 0.4mmol), and DMSO (2 mL). The reaction mixture was vigorously stirred at 65 °C for 3h, and then detected directly by <sup>19</sup>F NMR without purification.

#### General procedure for the controlling experiments and mechanism studies

Rh(PPh<sub>3</sub>)<sub>3</sub>Cl (5 mol% , 9.2mg), Ag<sub>2</sub>CO<sub>3</sub> (1 equiv. 55.2mg), additive (20 mol%) and **1a** (0.2 mmol) were suspended in 1, 4-dioxane (2 ml) in a Schlenk tube under nitrogen. The resulting mixture was stirred at 100 °C for 2h. The product yield was determined by <sup>19</sup>F NMR using PhCF<sub>3</sub> as external standard.

#### References:

1. M. J. Hall, S. O. McDonnell, J. Killoran, and D. F. O'Shea, *J. Org. Chem.* 2005, **70**, 5571-5578.
2. S. K. Guchhait, M. Kashyap, and H. Kamble, *J. Org. Chem.* 2011, **76**, 4753-4758.
3. Y. Suzuki, A. B. Md., T. Tanoi, N. Nomura, and M. Sato, *Tetrahedron* 2011, **67**, 4710-4715.

## Characterization data for the substrates and Products

### N-(2-bromo-2,2-difluoro-1-(2-phenyl-1H-indol-1-yl)ethylidene)-4-methoxyaniline (1a)

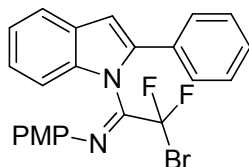

yellow solid; **mp**: 84-85 °C; **<sup>1</sup>H NMR** (400 MHz, CDCl<sub>3</sub>) δ 7.66-7.57 (m, 1H), 7.31 (m, 5H), 7.22-7.08 (m, 3H), 6.80 (s, 1H), 6.84-6.82 (m, 2H), 6.72-6.70 (m, 2H), 3.71 (s, 3H); **<sup>19</sup>F NMR** (282 MHz, CDCl<sub>3</sub>) δ -49.49 (dd, *J* = 428.5, 156.8 Hz, 2F); **<sup>13</sup>C NMR** (100 MHz, CDCl<sub>3</sub>) δ 160.28, 140.79 (t, *J*=29.4Hz), 139.35, 135.97, 135.73, 131.97, 129.12, 128.78, 128.39, 127.32, 126.81, 123.55, 122.03, 120.97, 114.41, 114.85 (t, *J*=309.6Hz), 111.78, 105.89, 55.40; **IR** (KBr, cm<sup>-1</sup>): ν 3052, 2957, 2835, 1647, 1591, 1504, 1452, 1338, 1255, 744; **MS (EI)** *m/z* (relative intensity) 545 (34, <sup>79</sup>Br) [M<sup>+</sup>], 546 (34, <sup>81</sup>Br) [M<sup>+</sup>], 264 (100), 262 (98); **Anal. Calcd.** For C<sub>23</sub>H<sub>17</sub>BrF<sub>2</sub>N<sub>2</sub>O: C, 60.67; H, 3.76; N, 6.15. Found: C, 60.80; H, 3.80; N, 6.04.

### N-(2-bromo-2,2-difluoro-1-(2-(p-tolyl)-1H-indol-1-yl)ethylidene)-4-methoxyaniline (1b)

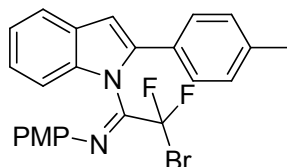

yellow solid; **mp**: 136-137 °C; **<sup>1</sup>H NMR** (400 MHz, CDCl<sub>3</sub>) δ 7.62-7.60 (m, 1H), 7.28-7.03 (m, 7H), 6.81 (s, 1H), 6.81-6.76 (m, 2H), 6.67-6.64 (m, 2H), 3.71 (s, 3H), 2.35 (s, 3H); **<sup>19</sup>F NMR** (282 MHz, CDCl<sub>3</sub>) δ -49.58 (dd, *J* = 499.1, 155.9 Hz, 2F); **<sup>13</sup>C NMR** (100 MHz, CDCl<sub>3</sub>) δ 160.28, 140.86 (t, *J*=29.3Hz), 129.20, 129.14, 127.17, 126.88, 123.32, 121.93, 120.82, 114.82 (t, *J*=308.9 Hz), 114.40, 111.70, 105.39, 55.39, 21.26; **IR** (KBr, cm<sup>-1</sup>): ν 3074, 2995, 2830, 1641, 1590, 1317, 1452, 745, 540, 512; **MS (EI)** *m/z* (relative intensity) 468 (39, <sup>79</sup>Br) [M<sup>+</sup>], 470 (39, <sup>81</sup>Br) [M<sup>+</sup>], 262 (100), 264 (98); **Anal. Calcd.** For C<sub>24</sub>H<sub>19</sub>BrF<sub>2</sub>N<sub>2</sub>O: C, 61.42; H, 4.08; N, 5.97. Found: C, 61.61; H, 4.18; N, 5.86.

### N-(2-bromo-2,2-difluoro-1-(2-(4-methoxyphenyl)-1H-indol-1-yl)ethylidene)-4-methoxyaniline (1c)

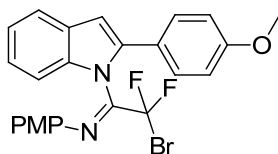

yellow solid; **mp**: 150-152 °C; **<sup>1</sup>H NMR** (400 MHz, CDCl<sub>3</sub>) δ 7.62-7.59 (m, 1H), 7.30 – 7.06 (m, 5H), 6.86-6.84 (m, 2H), 6.79 – 6.75 (m, 2H), 6.71 (s, 1H), 6.67-6.64 (m, 2H), 3.80 (s, 3H), 3.71 (s, 3H); **<sup>19</sup>F NMR** (282 MHz, CDCl<sub>3</sub>) δ -49.47 (dd, *J* = 445.6, 156.6 Hz, 2F); **<sup>13</sup>C NMR** (100 MHz, CDCl<sub>3</sub>) δ 160.27, 141.58 (t, *J*=30.8Hz), 159.85, 129.25, 128.70, 126.84, 124.50, 123.20, 121.93, 120.72, 114.89 (t, *J*=311.8Hz), 114.39, 114.23, 111.65, 105.03, 55.40, 55.32; **IR** (KBr, cm<sup>-1</sup>): ν 2963, 2830, 1253, 1501, 1451, 1253, 1031, 969, 799, 539; **MS (EI)** *m/z* (relative intensity) 486 (25, <sup>79</sup>Br) [M<sup>+</sup>], 484 (23, <sup>81</sup>Br) [M<sup>+</sup>], 43 (100); **Anal. Calcd.** For C<sub>24</sub>H<sub>19</sub>BrF<sub>2</sub>N<sub>2</sub>O<sub>2</sub>: C, 59.40; H, 3.95; N, 5.77. Found: C, 59.19; H, 4.10; N, 5.56.

### N-(2-bromo-2,2-difluoro-1-(2-(4-fluorophenyl)-1H-indol-1-yl)ethylidene)-4-methoxyaniline

(1d)

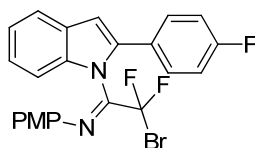

yellow solid; **mp**: 140-141 °C;  $^1\text{H NMR}$  (400 MHz,  $\text{CDCl}_3$ )  $\delta$  7.66 – 7.60 (m, 1H), 7.27 – 7.13 (m, 5H), 7.00 (t,  $J = 8.6$  Hz, 2H), 6.74 (s, 1H), 6.72-6.70 (m, 2H), 6.66-6.64 (m, 2H), 3.72 (s, 3H);  $^{19}\text{F NMR}$  (282 MHz,  $\text{CDCl}_3$ )  $\delta$  -49.23 (q,  $J = 158.3$  Hz, 2F), -101.15 – -125.05 (m, 1F);  $^{13}\text{C NMR}$  (100 MHz,  $\text{CDCl}_3$ )  $\delta$  164.07, 161.60, 160.35, 140.58 (t,  $J = 34.3$  Hz), 138.27, 136.03, 135.62, 129.33, 129.24, 129.00, 128.04, 126.74, 123.68, 122.14, 120.97, 115.89, 115.67, 114.41, 111.78, 55.42; **IR** (KBr,  $\text{cm}^{-1}$ ):  $\nu$  3000, 2825, 1588, 1503, 1135, 970, 800, 520; **MS (EI)**  $m/z$  (relative intensity) 472 (5,  $^{79}\text{Br}$ ) [ $\text{M}^+$ ], 474 (5,  $^{81}\text{Br}$ ) [ $\text{M}^+$ ], 160 (100); **Anal. Calcd.** For  $\text{C}_{23}\text{H}_{16}\text{BrF}_3\text{N}_2\text{O}$ : C, 58.37; H, 3.41; N, 5.92. Found: C, 58.55; H, 3.63; N, 5.80.

**N-(2-bromo-1-(2-(4-chlorophenyl)-1H-indol-1-yl)-2,2-difluoroethylidene)-4-methoxyaniline**

(1e)

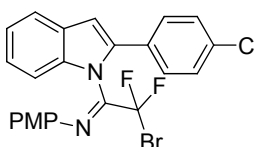

yellow solid; **mp**: 169-172 °C;  $^1\text{H NMR}$  (400 MHz,  $\text{CDCl}_3$ )  $\delta$  7.65-7.62 (m, 1H), 7.30-7.28 (m, 2H), 7.22 – 7.14 (m, 5H), 6.78 (s, 1H), 6.74-6.71 (m, 2H), 6.67-6.65 (m, 2H), 3.73 (s, 3H);  $^{19}\text{F NMR}$  (282 MHz,  $\text{CDCl}_3$ )  $\delta$  -49.40 (q,  $J = 158.1$  Hz, 2F);  $^{13}\text{C NMR}$  (100 MHz,  $\text{CDCl}_3$ )  $\delta$  159.50, 140.08 (t,  $J = 26.8$  Hz), 136.12, 134.45, 128.69, 125.27, 123.48, 121.71, 121.10, 114.49 (t,  $J = 309.6$  Hz), 114.20, 112.01, 106.79, 55.30; **IR** (KBr,  $\text{cm}^{-1}$ ):  $\nu$  2931, 2840, 1589, 1503, 1113, 1027, 866, 543; **MS (EI)**  $m/z$  (relative intensity) 490 (22) [ $\text{M}^+$ ], 262 (100); **Anal. Calcd.** For  $\text{C}_{23}\text{H}_{16}\text{BrClF}_2\text{N}_2\text{O}$ : C, 56.41; H, 3.29; N, 5.72. Found: C, 56.41; H, 3.42; N, 5.68.

**N-(2-bromo-1-(2-(4-bromophenyl)-1H-indol-1-yl)-2,2-difluoroethylidene)-4-methoxyaniline**

(1f)

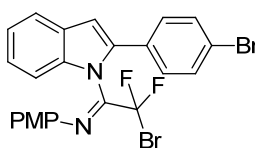

yellow solid; **mp**: 171 °C;  $^1\text{H NMR}$  (400 MHz,  $\text{CDCl}_3$ )  $\delta$  7.64-7.62 (m, 1H), 7.44 (d,  $J = 8.4$  Hz, 2H), 7.23 – 7.11 (m, 5H), 6.78 (s, 1H), 6.74-6.71 (m, 2H), 6.67-6.65 (m, 2H), 3.72 (s, 3H);  $^{19}\text{F NMR}$  (282 MHz,  $\text{CDCl}_3$ )  $\delta$  -49.36 (q,  $J = 158.0$  Hz, 2F);  $^{13}\text{C NMR}$  (100 MHz,  $\text{CDCl}_3$ )  $\delta$  160.39, 140.41 (t,  $J = 28.6$  Hz), 138.07, 136.17, 135.55, 131.92, 130.83, 128.94, 128.80, 126.77, 123.89, 122.62, 122.21, 121.07, 114.84 (t,  $J = 28.6$  Hz), 114.44, 111.83, 106.34, 55.43; **IR** (KBr,  $\text{cm}^{-1}$ ):  $\nu$  3005, 2840, 1589, 1503, 1338, 1135, 970, 800, 746, 520; **MS (ESI)**  $m/z$  535 [ $\text{M}+\text{H}^+$ ]; **Anal. Calcd.** For  $\text{C}_{23}\text{H}_{16}\text{Br}_2\text{F}_2\text{N}_2\text{O}$ : C, 51.71; H, 3.02; N, 5.24. Found: C, 51.97; H, 3.19; N, 5.19.

**N-(2-bromo-2,2-difluoro-1-(2-(4-nitrophenyl)-1H-indol-1-yl)ethylidene)-4-methoxyaniline**

(1g)

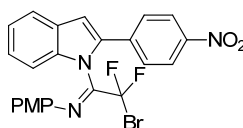



yellow solid; **mp**: 169-171 °C;  $^1\text{H NMR}$  (300 MHz,  $\text{CDCl}_3$ )  $\delta$  8.19 (d,  $J = 8.6$  Hz, 2H), 7.74 – 7.66 (m, 1H), 7.44 (d,  $J = 8.6$  Hz, 2H), 7.28-7.19 (m, 3H), 6.96 (s, 1H), 6.70 (dd,  $J = 18.5, 9.0$  Hz, 4H), 3.75 (s, 3H);  $^{19}\text{F NMR}$  (282 MHz,  $\text{CDCl}_3$ )  $\delta$  -49.34 (q,  $J = 159.5$  Hz, 2F);  $^{13}\text{C NMR}$  (100 MHz,  $\text{CDCl}_3$ )  $\delta$  160.62, 147.30, 138.11, 136.79, 136.68, 135.26, 128.65, 127.67, 126.81, 124.89, 124.07, 122.62, 121.54, 114.55, 112.03, 108.47, 55.47; **IR** (KBr,  $\text{cm}^{-1}$ ):  $\nu$  3085, 2926, 2835, 1598, 1351, 1125, 967, 750, 522; **MS (ESI)**  $m/z$  500  $[\text{M}+\text{H}^+]$ , 522  $[\text{M}+\text{Na}^+]$ ; **HRMS (ESI)**  $m/e$  calcd. for  $\text{C}_{23}\text{H}_{16}\text{F}_2\text{N}_3\text{NaO}_3^+ [\text{M}+\text{Na}^+]$  522.0235, Found: 522.02422.

**methyl 4-(1-(2-bromo-2,2-difluoro-1-((4-methoxyphenyl)imino)ethyl)-1H-indol-2-yl)benzoate (1h)**

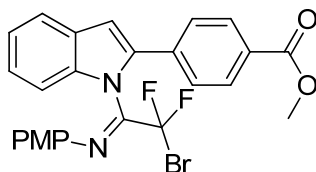

yellow solid; **mp**: 118-120°C;  $^1\text{H NMR}$  (400 MHz,  $\text{CDCl}_3$ )  $\delta$  7.99 (d,  $J = 8.3$  Hz, 2H), 7.80 – 7.59 (m, 1H), 7.37 (d,  $J = 8.3$  Hz, 2H), 7.23 – 7.13 (m, 3H), 6.88 (s, 1H), 6.75 (d,  $J = 9.0$  Hz, 2H), 6.64 (d,  $J = 9.0$  Hz, 2H), 3.90 (s, 3H), 3.69 (s, 3H);  $^{19}\text{F NMR}$  (282 MHz,  $\text{CDCl}_3$ )  $\delta$  -50.12 (q,  $J = 158.3$  Hz);  $^{13}\text{C NMR}$  (100 MHz,  $\text{CDCl}_3$ )  $\delta$  166.56, 160.35, 140.28 (t,  $J = 29.2$  Hz), 138.05, 136.34, 136.18, 135.46, 130.04, 129.63, 128.83, 126.95, 126.73, 124.21, 122.29, 121.26, 114.70 (t,  $J = 308.3$  Hz), 114.43, 111.87, 107.25, 55.39, 52.21; **IR** (KBr,  $\text{cm}^{-1}$ ):  $\nu$  2952, 1717, 1592, 1449, 1282, 1132, 964, 865, 510; **MS (EI)**  $m/z$  (relative intensity) 512 (12,  $^{79}\text{Br}$ )  $[\text{M}^+]$ , 514 (11,  $^{81}\text{Br}$ )  $[\text{M}^+]$ , 262 (100), 264 (99); **Anal. Calcd.** For  $\text{C}_{25}\text{H}_{19}\text{BrF}_2\text{N}_2\text{O}_3$ : C, 58.49; H, 3.73; N, 5.46. Found: C, 58.55; H, 3.86; N, 5.18.

**N-(2-bromo-2,2-difluoro-1-(2-(4-(methylsulfonyl)phenyl)-1H-indol-1-yl)ethylidene)-4-methoxyaniline (1i)**

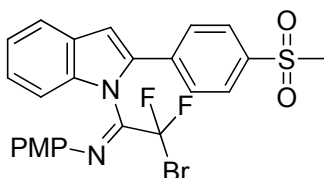

yellow solid; **mp**: 120-122°C;  $^1\text{H NMR}$  (300 MHz,  $\text{CDCl}_3$ )  $\delta$  7.89 (d,  $J = 8.4$  Hz, 2H), 7.74 – 7.63 (m, 1H), 7.47 (d,  $J = 8.4$  Hz, 2H), 7.34 – 7.12 (m, 3H), 6.93 (s, 1H), 6.65-6.74 (m, 4H), 3.74 (s, 3H), 3.06 (s, 3H);  $^{19}\text{F NMR}$  (282 MHz,  $\text{CDCl}_3$ )  $\delta$  -49.19 (q,  $J = 159.4$  Hz);  $^{13}\text{C NMR}$  (100 MHz,  $\text{CDCl}_3$ )  $\delta$  160.60, 139.87 (t,  $J = 29.1$  Hz), 137.19, 136.97, 136.63, 135.29, 128.70, 127.88, 127.81, 126.81, 124.72, 122.58, 121.53, 114.79 (t,  $J = 307.1$  Hz), 114.56, 112.00, 108.16, 55.49, 44.51; **IR** (KBr,  $\text{cm}^{-1}$ ):  $\nu$  2920, 1645, 1590, 1505, 1448, 1310, 1148, 967, 537; **MS (EI)**  $m/z$  (relative intensity) 532 (6,  $^{79}\text{Br}$ )  $[\text{M}^+]$ , 534 (6,  $^{81}\text{Br}$ )  $[\text{M}^+]$ , 262 (100), 264 (98); **Anal. Calcd.** For  $\text{C}_{24}\text{H}_{19}\text{BrF}_2\text{N}_2\text{O}_3\text{S}$ : C, 54.04; H, 3.59; N, 5.25. Found: C, 54.27; H, 3.67; N, 5.43.

**N-(2-bromo-2,2-difluoro-1-(2-(4-morpholinophenyl)-1H-indol-1-yl)ethylidene)-4-methoxyaniline (1j)**

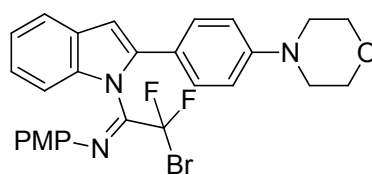

yellow solid;  $^1\text{H NMR}$  (300 MHz,  $\text{CDCl}_3$ )  $\delta$  7.61 (d,  $J = 6.5$  Hz, 1H), 7.26 (d,  $J = 8.6$  Hz, 2H), 7.19 – 7.07 (m, 3H), 6.85 (d,  $J = 8.9$  Hz, 4H), 6.74 (s, 1H), 6.67 (d,  $J = 9.0$  Hz, 2H), 3.92 – 3.75 (m, 4H), 3.71 (s, 3H), 3.31 – 3.07 (m, 4H);  $^{19}\text{F NMR}$  (282 MHz,  $\text{CDCl}_3$ )  $\delta$  -50.33 (dd,  $J = 560.5$ , 155.5 Hz);  $^{13}\text{C NMR}$  (100 MHz,  $\text{CDCl}_3$ )  $\delta$  160.28, 151.13, 141.06 (t,  $J = 29.0$  Hz), 139.50, 135.79, 135.71, 129.36, 128.22, 126.94, 123.18, 123.07, 121.91, 120.65, 115.29, 114.83 (t,  $J = 309.0$  Hz), 114.42, 111.60, 104.62, 66.78, 55.39, 48.69; **IR** (KBr,  $\text{cm}^{-1}$ ):  $\nu$  2963, 2850, 1609, 1505, 1452, 1260, 1094, 1024, 800; **MS (EI)**  $m/z$  (relative intensity) 539 (38,  $^{79}\text{Br}$ ) [ $\text{M}^+$ ], 541 (35,  $^{81}\text{Br}$ ) [ $\text{M}^+$ ], 277 (100); **HRMS (EI)** calcd. For  $\text{C}_{27}\text{H}_{24}\text{BrF}_2\text{N}_3\text{O}_2$ : 539.1020, Found: 539.1017.

**N-(2-bromo-2,2-difluoro-1-(2-(*o*-tolyl)-1H-indol-1-yl)ethylidene)-4-methoxyaniline (1k)**

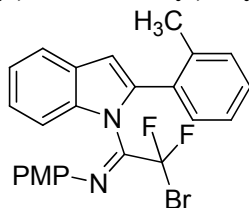

yellow solid; **mp**: 79-80°C;  $^1\text{H NMR}$  (300 MHz,  $\text{CDCl}_3$ )  $\delta$  7.70-7.61 (m, 1H), 7.35 – 7.12 (m, 5H), 7.08 (s, 1H), 6.96-6.89 (m, 1H), 6.69 (s, 5H), 3.74 (s, 3H), 2.23 (s, 3H);  $^{19}\text{F NMR}$  (282 MHz,  $\text{CDCl}_3$ )  $\delta$  -49.76 (s, 2F);  $^{13}\text{C NMR}$  (100 MHz,  $\text{CDCl}_3$ )  $\delta$  160.32, 140.63 (t,  $J = 29.3$  Hz), 137.67, 137.23, 135.80, 135.37, 130.89, 130.79, 129.14, 128.94, 128.73, 126.91, 125.65, 123.48, 121.97, 120.98, 114.90 (t,  $J = 310.3$  Hz), 114.45, 111.75, 107.56, 55.45, 20.43; **IR** (KBr,  $\text{cm}^{-1}$ ):  $\nu$  3053, 2824, 1645, 1589, 1504, 1453, 1338, 969, 762, 529; **MS (EI)**  $m/z$  (relative intensity) 468 (22,  $^{79}\text{Br}$ ) [ $\text{M}^+$ ], 470 (26,  $^{81}\text{Br}$ ) [ $\text{M}^+$ ], 262 (97), 264 (100); **Anal. Calcd.** For  $\text{C}_{24}\text{H}_{19}\text{BrF}_2\text{N}_2\text{O}$ : C, 61.42; H, 4.08; N, 5.97. Found: C, 61.37; H, 4.15; N, 5.89.

**N-(2-bromo-2,2-difluoro-1-(2-(3-methoxyphenyl)-1H-indol-1-yl)ethylidene)-4-methoxyaniline (1l)**

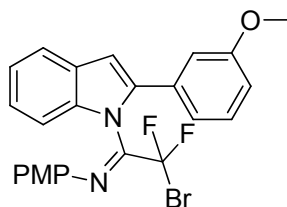

yellow solid; **mp**: 78-79°C;  $^1\text{H NMR}$  (300 MHz,  $\text{CDCl}_3$ )  $\delta$  7.68 – 7.61 (m, 1H), 7.26-7.13 (m, 4H), 6.96 – 6.72 (m, 6H), 6.66 (d,  $J = 8.9$  Hz, 2H), 3.72 (s, 3H), 3.72 (s, 3H);  $^{19}\text{F NMR}$  (282 MHz,  $\text{CDCl}_3$ )  $\delta$  -49.51 (dd,  $J = 514.3$ , 157.0 Hz, 2F);  $^{13}\text{C NMR}$  (100 MHz,  $\text{CDCl}_3$ )  $\delta$  160.36, 140.80 (t,  $J = 27.1$  Hz), 159.89, 139.30, 136.00, 135.74, 133.24, 129.93, 129.10, 126.91, 123.69, 122.15, 121.08, 119.70, 114.64, 114.92 (t,  $J = 312.6$  Hz), 114.47, 112.42, 111.82, 106.00, 55.40, 55.22; **IR** (KBr,  $\text{cm}^{-1}$ ):  $\nu$  2963, 2840, 1500, 1340, 1178, 743, 538; **MS (EI)**  $m/z$  (relative intensity) 484 (31,  $^{79}\text{Br}$ ) [ $\text{M}^+$ ], 486 (34,  $^{81}\text{Br}$ ) [ $\text{M}^+$ ], 262 (100), 264 (96); **Anal. Calcd.** For  $\text{C}_{24}\text{H}_{19}\text{BrF}_2\text{N}_2\text{O}_2$ : C, 59.40; H, 3.95; N, 5.77. Found: C, 59.52; H, 4.02; N, 5.66.

**N-(2-bromo-1-(2-(3-chlorophenyl)-1H-indol-1-yl)-2,2-difluoroethylidene)-4-methoxyaniline (1m)**

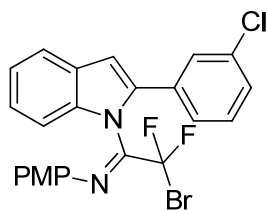

yellow solid; **mp**: 88-92 °C;  $^1\text{H NMR}$  (300 MHz,  $\text{CDCl}_3$ )  $\delta$  7.66-7.64 (m, 1H), 7.28 – 7.19 (m, 6H), 7.14-7.12 (m, 1H), 6.79 (s, 1H), 6.64 (s, 4H), 3.74 (s, 3H);  $^{19}\text{F NMR}$  (282 MHz,  $\text{CDCl}_3$ )  $\delta$  -42.12 – -51.39 (m, 2F);  $^{13}\text{C NMR}$  (100 MHz,  $\text{CDCl}_3$ )  $\delta$  160.26, 140.74 ( $t$ ,  $J = 29.4$  Hz), 137.85, 136.39, 135.68, 134.63, 133.53, 129.87, 128.85, 128.39, 127.70, 126.32, 125.29, 124.06, 122.28, 121.19, 115.00 ( $t$ ,  $J = 308.9$  Hz), 114.41, 111.89, 55.43; **IR** (KBr,  $\text{cm}^{-1}$ ):  $\nu$  3078, 2846, 1648, 1590, 1500, 970, 800, 531; **MS (ESI)**  $m/z$  491 [ $\text{M}+\text{H}^+$ ]; **Anal. Calcd.** For  $\text{C}_{23}\text{H}_{16}\text{BrClF}_2\text{N}_2\text{O}$ : C, 56.41; H, 3.29; N, 5.72. Found: C, 56.70; H, 3.28; N, 5.63.

**1-(1-(2-bromo-2,2-difluoro-1-((4-methoxyphenyl)imino)ethyl)-2-phenyl-1H-indol-3-yl)ethanone(1n)**

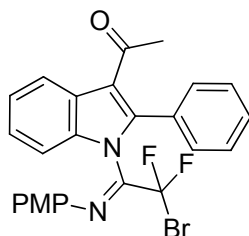

$^1\text{H NMR}$  (300 MHz,  $\text{CDCl}_3$ )  $\delta$  8.49 (d,  $J = 7.0$  Hz, 1H), 7.45-7.37 (m, 2H), 7.35-7.30 (m, 4H), 7.05 (d,  $J = 7.4$  Hz, 2H), 6.72 (d,  $J = 9.2$  Hz, 2H), 6.64 (d,  $J = 9.2$  Hz, 2H), 3.77 (s, 3H), 1.98 (s, 3H);  $^{19}\text{F NMR}$  (282 MHz,  $\text{CDCl}_3$ )  $\delta$  -50.56 (q,  $J = 161.4$  Hz, 2F);  $^{13}\text{C NMR}$  (100 MHz,  $\text{CDCl}_3$ )  $\delta$  195.36, 160.83, 143.70, 138.76( $t$ ,  $J = 30.9$  Hz), 135.16, 135.07, 130.28, 130.11, 130.07, 128.40, 127.18, 126.90, 125.04, 124.05, 123.31, 122.34, 118.84, 114.60( $t$ ,  $J = 308.5$  Hz), 114.43, 111.13, 67.10, 55.49, 30.41; **IR** (KBr,  $\text{cm}^{-1}$ ):  $\nu$  2840, 1720, 1654, 1591, 1505, 1387, 1256, 1166, 1029, 747; **MS (EI)**  $m/z$  (relative intensity) 496 (3,  $^{79}\text{Br}$ ) [ $\text{M}^+$ ], 498 (3,  $^{81}\text{Br}$ ) [ $\text{M}^+$ ], 122 (100); **HRMS (EI)** calcd. For  $\text{C}_{25}\text{H}_{19}\text{BrF}_2\text{N}_2\text{O}_2$ : 496.0598, Found: 496.0596.

**N-(2-bromo-2,2-difluoro-1-(5-methyl-2-phenyl-1H-indol-1-yl)ethylidene)-4-methoxyaniline (1o)**

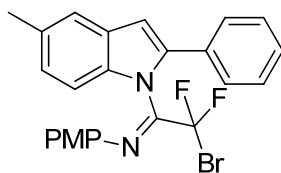

yellow solid; **mp**: 114-115°C;  $^1\text{H NMR}$  (300 MHz,  $\text{CDCl}_3$ )  $\delta$  7.42 (s, 1H), 7.30 (s, 5H), 7.01 (s, 2H), 6.81 – 6.63 (m, 5H), 3.73 (s, 3H), 2.43 (s, 3H);  $^{19}\text{F NMR}$  (282 MHz,  $\text{CDCl}_3$ )  $\delta$  -49.49 (dd,  $J = 409.7, 156.8$  Hz, 2F);  $^{13}\text{C NMR}$  (100 MHz,  $\text{CDCl}_3$ )  $\delta$  160.23, 141.05 ( $t$ ,  $J = 27.2$  Hz), 139.41, 135.85, 134.39, 132.12, 131.47, 129.42, 128.78, 128.3, 127.26, 126.83, 125.15, 120.78, 114.90 ( $t$ ,  $J = 309.6$  Hz), 114.42, 111.48, 55.41, 21.44; **IR** (KBr,  $\text{cm}^{-1}$ ):  $\nu$  3053, 2904, 2835, 1595, 1500, 1462, 1256, 1027, 800, 520; **MS (EI)**  $m/z$  (relative intensity) 468 (42,  $^{79}\text{Br}$ ) [ $\text{M}^+$ ], 470 (42,  $^{81}\text{Br}$ ) [ $\text{M}^+$ ], 262 (100), 264 (98); **Anal. Calcd.** For  $\text{C}_{24}\text{H}_{19}\text{BrF}_2\text{N}_2\text{O}$ : C, 61.42; H, 4.08; N, 5.97. Found: C, 61.66; H, 4.28; N, 5.85.

**N-(2-bromo-2,2-difluoro-1-(5-fluoro-2-phenyl-1H-indol-1-yl)ethylidene)-4-methoxyaniline (1p)**

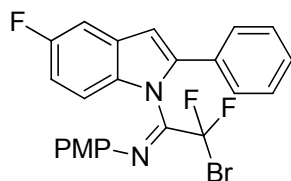

yellow solid; **mp**: 121-122 °C;  $^1\text{H NMR}$  (300 MHz,  $\text{CDCl}_3$ )  $\delta$  7.33-7.30 (m, 6H), 7.04-7.00(m,1H), 6.93-6.87 (m, 1H), 6.77-6.66 (m, 5H), 3.74 (s, 3H);  $^{19}\text{F NMR}$  (282 MHz,  $\text{CDCl}_3$ )  $\delta$  -49.76 (dd,  $J = 441.5, 156.6$  Hz, 2F), -81.25 – -133.35 (m, 1F);  $^{13}\text{C NMR}$  (100 MHz,  $\text{CDCl}_3$ )  $\delta$  160.45, 158.95 (d,  $J = 237.8$  Hz), 140.98, 140.27 (t,  $J = 26.8$  Hz), 135.52, 132.23, 131.68, 129.69 (d,  $J = 10.4$  Hz), 128.87, 128.68, 127.27, 126.84, 114.64 (t,  $J = 305.7$  Hz), 114.49, 112.58 (d,  $J = 9.6$  Hz), 111.93, 111.67, 106.21, 105.97, 105.71 (d,  $J = 4.3$  Hz), 55.43; **IR** (KBr,  $\text{cm}^{-1}$ ):  $\nu$  3021, 2960, 2830, 1590, 1504, 1467, 967, 521; **MS (EI)**  $m/z$  (relative intensity) 472 (3) [ $\text{M}^+$ ], 160 (100); **Anal. Calcd.** For  $\text{C}_{23}\text{H}_{16}\text{BrF}_3\text{N}_2\text{O}$ : C, 58.37; H, 3.41; N, 5.92. Found: C, 58.60; H, 3.61; N, 5.89.

**N-(2-bromo-1-(5-bromo-2-phenyl-1H-indol-1-yl)-2,2-difluoroethylidene)-4-methoxyaniline (1q)**

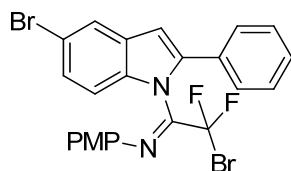

yellow solid; **mp**: 145-146 °C;  $^1\text{H NMR}$  (300 MHz,  $\text{CDCl}_3$ )  $\delta$  7.77 (s, 1H), 7.39-7.25 (m, 6H), 6.98-6.95 (m, 1H), 6.79-6.67 (m, 5H), 3.75 (s, 3H);  $^{19}\text{F NMR}$  (282 MHz,  $\text{CDCl}_3$ )  $\delta$  -49.84 (dd,  $J = 451.3, 156.8$  Hz, 2F);  $^{13}\text{C NMR}$  (100 MHz,  $\text{CDCl}_3$ )  $\delta$  160.54, 140.60, 139.83 (t,  $J = 27.5$  Hz), 135.40, 134.53, 131.48, 130.77, 128.93, 128.80, 127.31, 126.89, 126.41, 123.55, 115.28, 114.55 (t,  $J = 310.3$  Hz), 114.58, 113.20, 105.07, 55.45; **IR** (KBr,  $\text{cm}^{-1}$ ):  $\nu$  3074, 2835, 1650, 1591, 1353, 840, 518; **MS (EI)**  $m/z$  (relative intensity) 534 (6) [ $\text{M}^+$ ], 218 (100); **Anal. Calcd.** For  $\text{C}_{23}\text{H}_{16}\text{Br}_2\text{F}_2\text{N}_2\text{O}$ : C, 51.71; H, 3.02; N, 5.24. Found: C, 51.90; H, 3.21; N, 5.26.

**N-(2-bromo-1-(4,6-dimethyl-2-phenyl-1H-indol-1-yl)-2,2-difluoroethylidene)-4-methoxyaniline (1r)**

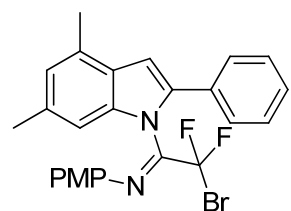

yellow solid; **mp**: 132-133 °C;  $^1\text{H NMR}$  (300 MHz,  $\text{CDCl}_3$ )  $\delta$  7.33-7.21 (m, 5H), 6.83-6.76 (m, 5H), 6.69-6.66 (m, 2H), 3.74 (s, 3H), 2.54 (s, 3H), 2.35 (s, 3H);  $^{19}\text{F NMR}$  (282 MHz,  $\text{CDCl}_3$ )  $\delta$  -49.09 (q,  $J = 157.6$  Hz, 2F);  $^{13}\text{C NMR}$  (100 MHz,  $\text{CDCl}_3$ )  $\delta$  160.18, 141.17 (t,  $J = 27.2$  Hz), 138.14, 136.35, 135.88, 133.66, 132.20, 130.08, 128.66, 128.06, 127.23, 126.86, 126.75, 124.18, 115.02 (t,  $J = 308.1$  Hz), 114.37, 109.28, 104.40, 55.40, 21.87, 18.58; **IR** (KBr,  $\text{cm}^{-1}$ ):  $\nu$  3021, 2915, 2840, 1587, 1503, 1255, 1026, 831, 532; **MS (EI)**  $m/z$  (relative intensity) 482 (41,  $^{79}\text{Br}$ ) [ $\text{M}^+$ ], 484 (39,  $^{81}\text{Br}$ ) [ $\text{M}^+$ ], 262 (100), 264 (93); **Anal. Calcd.** For  $\text{C}_{25}\text{H}_{21}\text{BrF}_2\text{N}_2\text{O}$ : C, 62.12; H, 4.38; N, 5.80. Found: 61.94; H, 4.48; N, 5.66.

**N-(2-bromo-2,2-difluoro-1-(7-methyl-2-phenyl-1H-indol-1-yl)ethylidene)-4-methoxyaniline (1s)**

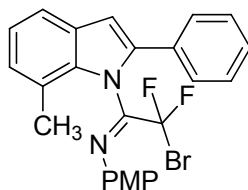

yellow solid; **mp**: 85-86 °C;  $^1\text{H NMR}$  (300 MHz,  $\text{CDCl}_3$ )  $\delta$  7.51 (d,  $J = 8.0$  Hz, 1H), 7.25-7.30 (m, 5H), 7.02 (d,  $J = 8.0$  Hz, 1H), 6.94 (s, 1H), 6.77-6.65 (m, 5H), 3.74 (s, 3H), 2.39 (s, 3H);  $^{19}\text{F NMR}$  (282 MHz,  $\text{CDCl}_3$ )  $\delta$  -49.10 (q,  $J = 157.9$  Hz, 2F);  $^{13}\text{C NMR}$  (100 MHz,  $\text{CDCl}_3$ )  $\delta$  160.23, 141.09 (t,  $J = 28.6$  Hz), 138.78, 136.56, 135.86, 133.65, 132.09, 128.72, 128.20, 127.29, 126.95, 126.81, 123.82, 120.60, 115.01 (t,  $J = 310.8$  Hz), 114.39, 111.72, 105.85, 55.41, 21.98; **IR** (KBr,  $\text{cm}^{-1}$ ):  $\nu$  3050, 2910, 2835, 1590, 1503, 1259, 1027, 837, 522; **MS (EI)**  $m/z$  (relative intensity) 468 (36,  $^{79}\text{Br}$ ) [ $\text{M}^+$ ], 470 (36,  $^{81}\text{Br}$ ) [ $\text{M}^+$ ], 262 (100), 264 (95); **Anal. Calcd.** For  $\text{C}_{24}\text{H}_{19}\text{BrF}_2\text{N}_2\text{O}$ : C, 61.42; H, 4.08; N, 5.97. Found: C, 61.70; H, 4.21; N, 5.92.

**N-(2-bromo-2,2-difluoro-1-(2-phenyl-1H-pyrrol-1-yl)ethylidene)-4-methoxyaniline (3a)**

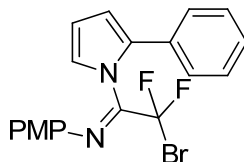

$^1\text{H NMR}$  (300 MHz,  $\text{CDCl}_3$ )  $\delta$  7.14-7.16 (m, 3H), 6.97-7.00 (m, 3H), 6.57 (d,  $J = 7.0$  Hz, 2H), 6.43 (m, 1H), 6.32 (m, 1H), 6.20 (d,  $J = 7.0$  Hz, 2H), 3.74 (s, 3H);  $^{19}\text{F NMR}$  (282 MHz,  $\text{CDCl}_3$ )  $\delta$  -50.13 (dd,  $J = 516.8, 162.3$  Hz);  $^{13}\text{C NMR}$  (100 MHz,  $\text{CDCl}_3$ )  $\delta$  159.23, 140.98 (t,  $J = 27.3$  Hz), 136.19, 134.93, 131.59, 128.23, 127.15, 126.75, 124.94, 120.75, 114.92 (t,  $J = 306.2$  Hz), 113.92, 112.06, 111.64, 55.44; **IR** (KBr,  $\text{cm}^{-1}$ ):  $\nu$  2920, 1663, 1605, 1509, 1446, 1134, 750, 537; **MS (EI)**  $m/z$  (relative intensity) 404 (24,  $^{79}\text{Br}$ ) [ $\text{M}^+$ ], 406 (24,  $^{81}\text{Br}$ ) [ $\text{M}^+$ ], 133 (100); **HRMS (EI)** calcd. For  $\text{C}_{19}\text{H}_{15}\text{BrF}_2\text{N}_2\text{O}$ : 404.0336, Found: 404.0335.

**N-(2-bromo-2,2-difluoro-1-(2-phenyl-1H-imidazol-1-yl)ethylidene)-4-methoxyaniline (3b)**

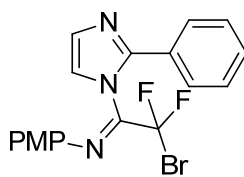

$^1\text{H NMR}$  (300 MHz,  $\text{CDCl}_3$ )  $\delta$  7.47 - 7.06 (m, 7H), 6.62 (d,  $J = 7.0$  Hz, 2H), 6.35 (d,  $J = 7.0$  Hz, 2H), 3.74 (s, 3H);  $^{19}\text{F NMR}$  (282 MHz,  $\text{CDCl}_3$ )  $\delta$  -51.31 (dd,  $J = 653.9, 163.2$  Hz);  $^{13}\text{C NMR}$  (100 MHz,  $\text{CDCl}_3$ )  $\delta$  159.85, 147.40, 138.66 (t,  $J = 28.3$  Hz), 135.27, 130.84, 129.27, 128.41, 127.03, 124.94, 119.38, 114.39 (t,  $J = 306.8$  Hz), 114.03, 55.36; **IR** (KBr,  $\text{cm}^{-1}$ ):  $\nu$  3061, 2840, 1592, 1504, 1388, 1254, 971, 816; **MS (EI)**  $m/z$  (relative intensity) 405 (22,  $^{79}\text{Br}$ ) [ $\text{M}^+$ ], 407 (21,  $^{81}\text{Br}$ ) [ $\text{M}^+$ ], 264 (100), 262(97); **HRMS (EI)** calcd. For  $\text{C}_{18}\text{H}_{14}\text{BrF}_2\text{N}_3\text{O}$ : 405.0288, Found: 405.0292.

**N-(2-bromo-1-(2,4-diphenyl-1H-pyrrol-1-yl)-2,2-difluoroethylidene)-4-methoxyaniline(3c)**

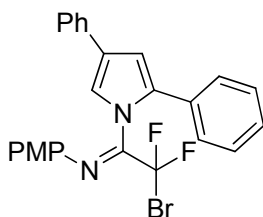

**<sup>1</sup>H NMR** (300 MHz, CDCl<sub>3</sub>) δ 7.63 (d, *J* = 7.6 Hz, 2H), 7.43 (m, 2H), 7.31 (m, 2H), 7.19 (m, 3H), 7.06 (m, 2H), 6.68 (s, 1H), 6.61 (d, *J* = 8.8 Hz, 2H), 6.33 (d, *J* = 8.8 Hz, 2H), 3.75 (s, 3H); **<sup>19</sup>F NMR** (282 MHz, CDCl<sub>3</sub>) δ -50.69 (dd, *J* = 549.3, 162.8 Hz); **<sup>13</sup>C NMR** (100 MHz, CDCl<sub>3</sub>) δ 159.34, 140.49 (t, *J* = 27.5 Hz), 136.14, 135.99, 133.98, 131.41, 128.91, 128.33, 128.08, 127.45, 126.84, 126.79, 125.53, 125.01, 116.69, 114.93 (t, *J* = 308.2 Hz), 114.06, 109.87, 55.47; **IR** (KBr, cm<sup>-1</sup>): ν 2963, 2830, 1654, 1479, 1504, 1249, 964, 758; **MS (ESI)** *m/z* 481 [M+H<sup>+</sup>], 503 [M+Na<sup>+</sup>]; **HRMS (ESI)** *m/e* calcd. for C<sub>25</sub>H<sub>20</sub>BrF<sub>2</sub>N<sub>2</sub>O<sup>+</sup> [M+Na<sup>+</sup>] 481.07216, Found: 481.07036.

**N-(2-bromo-1-(2-(4-chlorophenyl)-4-phenyl-1H-pyrrol-1-yl)-2,2-difluoroethylidene)-4-methoxyaniline(3d)**

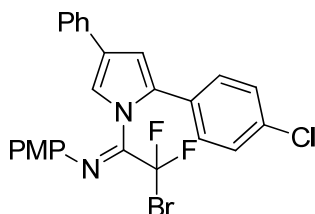

**<sup>1</sup>H NMR** (300 MHz, CDCl<sub>3</sub>) δ 7.59 (d, *J* = 7.1 Hz, 2H), 7.41 (m, 2H), 7.30 (d, *J* = 14.0 Hz, 2H), 7.13 (d, *J* = 8.5 Hz, 2H), 6.93 (d, *J* = 8.6 Hz, 2H), 6.66 – 6.52 (m, 3H), 6.29 (d, *J* = 9.0 Hz, 2H), 3.75 (s, 3H); **<sup>19</sup>F NMR** (282 MHz, CDCl<sub>3</sub>) δ -49.89 (dd, *J* = 505.1, 163.8 Hz); **<sup>13</sup>C NMR** (100 MHz, CDCl<sub>3</sub>) δ 159.46, 140.03 (t, *J* = 27.4 Hz), 135.95, 134.71, 133.72, 133.44, 129.85, 128.91, 128.47, 128.18, 128.01, 126.95, 125.51, 125.00, 116.91, 114.87 (t, *J* = 307.8 Hz), 114.09, 110.25, 67.12, 55.46; **IR** (KBr, cm<sup>-1</sup>): ν 2958, 2835, 1652, 1598, 1504, 1468, 1357, 1249, 965, 815; **MS (EI)** *m/z* (relative intensity) 514 (3) [M<sup>+</sup>], 88 (100); **HRMS (EI)** calcd. For C<sub>25</sub>H<sub>18</sub>BrClF<sub>2</sub>N<sub>2</sub>O: 514.0259, Found: 514.0255.

**N-(2-bromo-1-(4-(tert-butyl)-2-(4-methoxyphenyl)-1H-pyrrol-1-yl)-2,2-difluoroethylidene)-4-methoxyaniline(3e)**

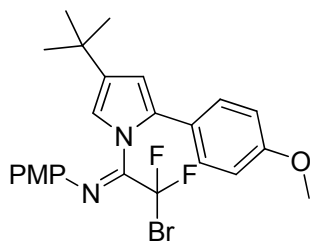

**<sup>1</sup>H NMR** (400 MHz, CDCl<sub>3</sub>) δ 6.85 (d, *J* = 8.7 Hz, 2H), 6.69 (s, 1H), 6.64 (d, *J* = 8.8 Hz, 2H), 6.60 – 6.49 (m, 2H), 6.16 (m, 3H), 3.73 (s, 3H), 3.72 (s, 3H), 1.29 (s, 9H); **<sup>19</sup>F NMR** (282 MHz, CDCl<sub>3</sub>) δ -49.30 (dd, *J* = 527.1, 164.3 Hz); **<sup>13</sup>C NMR** (100 MHz, CDCl<sub>3</sub>) δ 159.04, 158.84, 141.75 (t, *J* = 27.3 Hz), 139.15, 136.52, 134.81, 127.96, 124.98, 124.64, 115.16, 114.86 (t, *J* = 306.0 Hz), 113.72, 113.59, 110.01, 55.43, 55.25, 31.37, 30.74; **IR** (KBr, cm<sup>-1</sup>): ν 2960, 2835, 1650, 1613, 1525, 1505, 1250, 963, 815; **MS (EI)** *m/z* (relative intensity) 490 (26, <sup>79</sup>Br) [M<sup>+</sup>], 492 (25, <sup>81</sup>Br) [M<sup>+</sup>], 262 (99), 264 (100); **HRMS (EI)** calcd. For C<sub>24</sub>H<sub>25</sub>F<sub>2</sub>N<sub>2</sub>O<sub>2</sub>Br: 490.1067, Found:

490.1069.

**N-(5,5-difluoroindolo[2,1-a]isoquinolin-6(5H)-ylidene)-4-methoxyaniline (2a)**

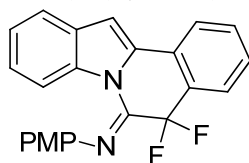

yellow solid; **mp**: 193-195°C;  $^1\text{H NMR}$  (400 MHz,  $\text{CDCl}_3$ )  $\delta$  8.55 (s, 1H), 7.63 (d,  $J = 7.6$  Hz, 1H), 7.58 (d,  $J = 7.6$  Hz, 1H), 7.63 (d,  $J = 7.6$  Hz, 1H), 7.53 (t,  $J = 7.6$  Hz, 1H), 7.37 (t,  $J = 7.6$  Hz, 1H), 7.30-7.24 (m, 2H), 7.05 (s, 1H), 7.02-7.00 (m, 2H), 6.94-6.92 (m, 2H), 3.83 (s, 3H);  $^{19}\text{F NMR}$  (282 MHz,  $\text{CDCl}_3$ )  $\delta$  -79.61 (s, 2F);  $^{13}\text{C NMR}$  (100 MHz,  $\text{CDCl}_3$ )  $\delta$  156.18, 141.41 (t,  $J = 28.6$  Hz), 140.36, 136.65, 132.88, 131.90, 130.40, 128.73, 127.21 (t,  $J = 28.5$  Hz), 125.94, 125.73, 123.92, 123.63, 121.15, 120.79, 116.82, 113.87, 104.00, 55.52; **IR** (KBr,  $\text{cm}^{-1}$ ):  $\nu$  3101, 2835, 1668, 1504, 1449, 1240, 1028, 749, 488; **MS (EI)**  $m/z$  (relative intensity) 374 (100) [ $\text{M}^+$ ]; **Anal. Calcd.** For  $\text{C}_{23}\text{H}_{16}\text{F}_2\text{N}_2\text{O}$ : C, 73.79; H, 4.31; N, 7.48. Found: C, 73.77; H, 4.54; N, 7.30.

**N-(5,5-difluoro-3-methylindolo[2,1-a]isoquinolin-6(5H)-ylidene)-4-methoxyaniline (2b)**

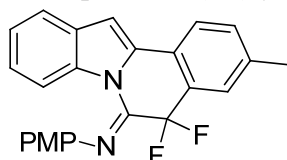

yellow solid; **mp**: 223-224 °C;  $^1\text{H NMR}$  (400 MHz,  $\text{CDCl}_3$ )  $\delta$  8.54 (s, 1H), 7.69 (d,  $J = 8.1$  Hz, 1H), 7.56 (d,  $J = 7.7$  Hz, 1H), 7.43 (s, 1H), 7.34-7.21 (m, 3H), 7.07 – 6.88 (m, 5H), 3.83 (s, 3H), 2.37 (s, 3H);  $^{19}\text{F NMR}$  (282 MHz,  $\text{CDCl}_3$ )  $\delta$  -79.65 (s, 2F);  $^{13}\text{C NMR}$  (100 MHz,  $\text{CDCl}_3$ )  $\delta$  156.13, 140.45, 139.11, 136.53, 133.13, 132.92, 130.52, 127.07 (t,  $J = 29.1$  Hz), 126.07, 125.46, 123.85, 123.65, 116.74, 113.84, 103.24, 55.53, 21.41; **IR** (KBr,  $\text{cm}^{-1}$ ):  $\nu$  3058, 2835, 1669, 1504, 1450, 1242, 1013, 806, 747, 488; **MS (EI)**  $m/z$  (relative intensity) 388 (100) [ $\text{M}^+$ ]; **HRMS (EI)** calcd. For  $\text{C}_{24}\text{H}_{18}\text{F}_2\text{N}_2\text{O}$ : 388.1387, Found: 388.1391.

**N-(5,5-difluoro-3-methoxyindolo[2,1-a]isoquinolin-6(5H)-ylidene)-4-methoxyaniline (2c)**

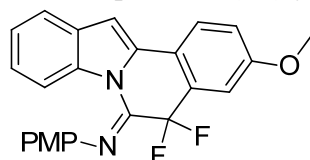

yellow solid; **mp**: 206-207 °C;  $^1\text{H NMR}$  (400 MHz,  $\text{CDCl}_3$ )  $\delta$  8.53 (s, 1H), 7.69 (d,  $J = 8.9$  Hz, 1H), 7.54 (d,  $J = 7.8$  Hz, 1H), 7.27-7.20 (m, 2H), 7.08 (d,  $J = 7.8$  Hz, 2H), 7.01 (d,  $J = 8.2$  Hz, 2H), 6.97 – 6.86 (m, 3H), 3.83 (s, 3H), 3.80 (s, 3H);  $^{19}\text{F NMR}$  (282 MHz,  $\text{CDCl}_3$ )  $\delta$  -79.65 (s, 2F);  $^{13}\text{C NMR}$  (100 MHz,  $\text{CDCl}_3$ )  $\delta$  160.06, 156.13, 140.46, 136.40, 133.06, 130.67, 128.40 (t,  $J = 23.5$  Hz), 125.41, 125.23, 123.85, 120.82, 119.85, 119.65, 116.67, 113.84, 109.04, 102.46, 55.57, 55.52; **IR** (KBr,  $\text{cm}^{-1}$ ):  $\nu$  3064, 2830, 1662, 1503, 1450, 1348, 1233, 1040, 805, 542; **MS (EI)**  $m/z$  (relative intensity) 404 (100) [ $\text{M}^+$ ]; **Anal. Calcd.** For  $\text{C}_{24}\text{H}_{18}\text{F}_2\text{N}_2\text{O}_2$ : C, 71.28; H, 4.49; N, 6.93. Found: C, 71.25; H, 4.56; N, 6.86.

**4-methoxy-N-(3,5,5-trifluoroindolo[2,1-a]isoquinolin-6(5H)-ylidene)aniline (2d)**

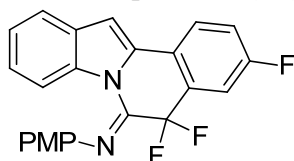

yellow solid; **mp**: 199-200 °C;  $^1\text{H NMR}$  (400 MHz,  $\text{CDCl}_3$ )  $\delta$  8.54 (s, 1H), 7.80-7.87 (m, 1H), 7.58 (d,  $J = 7.8$  Hz, 1H), 7.36 – 7.18 (m, 4H), 7.07 – 6.90 (m, 5H), 3.84 (s, 3H);  $^{19}\text{F NMR}$  (282 MHz,  $\text{CDCl}_3$ )  $\delta$  -79.93 (s, 2F), -109.63 (s, 1F);  $^{13}\text{C NMR}$  (100 MHz,  $\text{CDCl}_3$ )  $\delta$  163.70, 161.21, 156.28, 140.11, 136.54, 132.07, 130.31, 126.00 (d,  $J = 8.1$  Hz), 125.80, 124.03, 123.27, 121.14, 120.77, 119.98 (d,  $J = 22.6$  Hz), 116.78, 113.90, 112.77 (d,  $J = 24.2$  Hz), 103.82, 100.00, 55.52; **IR** (KBr,  $\text{cm}^{-1}$ ):  $\nu$  3069, 2835, 1658, 1498, 1449, 1241, 1036, 858, 750, 530; **MS (EI)**  $m/z$  (relative intensity) 392 (100) [ $\text{M}^+$ ]; **HRMS (EI)** calcd. For  $\text{C}_{23}\text{H}_{15}\text{F}_3\text{N}_2\text{O}$ : 392.1136, Found: 392.1135.

**N-(3-chloro-5,5-difluoroindolo[2,1-a]isoquinolin-6(5H)-ylidene)-4-methoxyaniline (2e)**

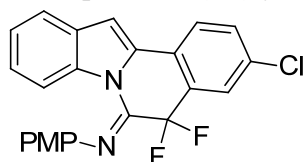

yellow solid; **mp**: 220-222 °C;  $^1\text{H NMR}$  (400 MHz,  $\text{CDCl}_3$ )  $\delta$  8.54 (d,  $J = 6.8$  Hz, 1H), 7.72 (d,  $J = 8.5$  Hz, 1H), 7.58-7.57 (m, 2H), 7.48 (d,  $J = 8.4$  Hz, 1H), 7.36 – 7.20 (m, 2H), 7.02-6.92 (m, 5H), 3.84 (s, 3H);  $^{19}\text{F NMR}$  (282 MHz,  $\text{CDCl}_3$ )  $\delta$  -80.20 (s, 2F);  $^{13}\text{C NMR}$  (100 MHz,  $\text{CDCl}_3$ )  $\delta$  156.33, 140.72 (t,  $J = 26.0$  Hz), 140.07, 136.65, 134.53, 132.34, 131.91, 130.23, 128.50 (t,  $J = 24.7$  Hz), 126.09, 126.05, 125.10, 124.07, 121.26, 120.78, 116.81, 113.91, 110.29 (t,  $J = 246.2$  Hz), 104.47, 55.54; **IR** (KBr,  $\text{cm}^{-1}$ ):  $\nu$  3080, 2835, 1668, 1505, 1398, 1242, 1034, 748, 490; **MS (EI)**  $m/z$  (relative intensity) 408 (100) [ $\text{M}^+$ ]; **Anal. Calcd.** For  $\text{C}_{23}\text{H}_{15}\text{ClF}_2\text{N}_2\text{O}$ : C, 67.57; H, 3.70; N, 6.85. Found: C, 67.54; H, 3.86; N, 6.83.

**N-(3-bromo-5,5-difluoroindolo[2,1-a]isoquinolin-6(5H)-ylidene)-4-methoxyaniline (2f)**

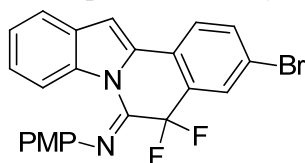

yellow solid; **mp**: 222-224 °C;  $^1\text{H NMR}$  (400 MHz,  $\text{CDCl}_3$ )  $\delta$  8.55 (s, 1H), 7.76 (s, 1H), 7.65 (s, 2H), 7.59 (d,  $J = 7.7$  Hz, 1H), 7.44 – 7.19 (m, 2H), 7.05 (s, 1H), 6.96 (dd,  $J = 29.4, 8.1$  Hz, 4H), 3.84 (s, 3H);  $^{19}\text{F NMR}$  (282 MHz,  $\text{CDCl}_3$ )  $\delta$  -80.16 (s, 2F);  $^{13}\text{C NMR}$  (100 MHz,  $\text{CDCl}_3$ )  $\delta$  156.34, 140.42 (t,  $J = 27.8$  Hz), 140.05, 136.69, 135.18, 131.96, 130.22, 129.08, 128.66, 126.06, (t,  $J = 25.4$  Hz), 125.69, 125.19, 124.08, 122.24, 121.27, 120.77, 116.80, 113.90, 110.19 (t,  $J = 246.9$  Hz), 104.54, 55.54; **IR** (KBr,  $\text{cm}^{-1}$ ):  $\nu$  3075, 2830, 1669, 1504, 1448, 1242, 1033, 748, 485; **MS (EI)**  $m/z$  (relative intensity) 454 (100,  $^{79}\text{Br}$ ) [ $\text{M}^+$ ], 542 (92,  $^{81}\text{Br}$ ) [ $\text{M}^+$ ]; **Anal. Calcd.** For  $\text{C}_{23}\text{H}_{15}\text{BrF}_2\text{N}_2\text{O}$ : C, 60.94; H, 3.34; N, 6.18. Found: C, 61.15; H, 3.57; N, 6.13.

**N-(5,5-difluoro-3-nitroindolo[2,1-a]isoquinolin-6(5H)-ylidene)-4-methoxyaniline (2g)**

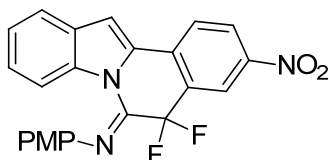

yellow solid; **mp**: 259-260 °C;  $^1\text{H NMR}$  (300 MHz,  $\text{CDCl}_3$ )  $\delta$  8.63 – 8.50 (m, 2H), 8.38 (d,  $J = 8.7$  Hz, 1H), 7.96 (d,  $J = 8.8$  Hz, 1H), 7.66 (d,  $J = 7.6$  Hz, 1H), 7.48 – 7.20 (m, 3H), 6.99 (dd,  $J = 23.4, 8.3$  Hz, 4H), 3.86 (s, 3H);  $^{19}\text{F NMR}$  (282 MHz,  $\text{CDCl}_3$ )  $\delta$  -80.47 (s, 2F);  $^{13}\text{C NMR}$  (100 MHz,  $\text{CDCl}_3$ )  $\delta$  156.60, 147.17, 140.02, 139.63, 137.20, 132.18, 130.75, 129.94, 128.01 (t,  $J = 26.3$  Hz), 127.29, 126.71, (t,  $J = 28.2$  Hz), 124.68, 124.46, 122.36, 121.88, 120.79, 117.01, 113.98, 109.82 (t,  $J = 247.5$  Hz), 107.67, 55.54; **IR** (KBr,  $\text{cm}^{-1}$ ):  $\nu$  3069, 2920, 2835, 1656, 1603, 1341,



1038, 826, 742, 538; **MS (ESI)**  $m/z$  420  $[M+H]^+$ ; **HRMS (ESI)**  $m/e$  calcd for  $C_{23}H_{16}F_2N_3O_3^+$   $[M+H]^+$  420.1154, Found: 420.11551.

**methyl-5,5-difluoro-6-((4-methoxyphenyl)imino)-5,6-dihydroindolo[2,1-a]isoquinoline-3-carboxylate (2h)**

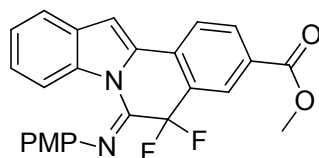

yellow solid; **mp**: 217-219°C;  **$^1H$  NMR** (300 MHz,  $CDCl_3$ )  $\delta$  8.58-8.55 (m, 1H), 8.32 (s, 1H), 8.16 (d,  $J = 8.0$  Hz, 1H), 7.84 (d,  $J = 8.0$  Hz, 1H), 7.61 (d,  $J = 7.2$  Hz, 2H), 7.43 – 7.20 (m, 2H), 7.15 (s, 1H), 7.03 (d,  $J = 7.3$  Hz, 2H), 6.94 (d,  $J = 7.1$  Hz, 2H), 3.91 (s, 3H), 3.85 (s, 3H);  **$^{19}F$  NMR** (282 MHz,  $CDCl_3$ )  $\delta$  -80.65;  **$^{13}C$  NMR** (100 MHz,  $CDCl_3$ )  $\delta$  165.48, 156.35, 140.08, 136.92, 132.65, 131.87, 130.15, 127.87, 127.19 (t,  $J = 24.7$  Hz), 126.51, 124.15, 123.68, 121.54, 120.78, 116.93, 113.89, 106.04, 55.54, 52.43; **IR** (KBr,  $cm^{-1}$ ):  $\nu$  2954, 1716, 1668, 1505, 1450, 1239, 1042, 751; **MS (EI)**  $m/z$  (relative intensity) 432 (100)  $[M^+]$ ; **Anal. Calcd.** For  $C_{25}H_{18}F_2N_2O_3$ : C, 69.44; H, 4.20; N, 6.48. Found: C, 69.29; H, 4.22; N, 6.40.

**N-(5,5-difluoro-3-(methylsulfonyl)indolo[2,1-a]isoquinolin-6(5H)-ylidene)-4-methoxyaniline (2i)**

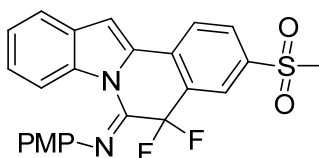

yellow solid; **mp**: 259-261°C;  **$^1H$  NMR** (400 MHz,  $CDCl_3$ )  $\delta$  8.57 (s, 1H), 8.23 (s, 1H), 8.08 (d,  $J = 8.1$  Hz, 1H), 7.98 (d,  $J = 8.4$  Hz, 1H), 7.64 (d,  $J = 7.7$  Hz, 1H), 7.47 – 7.20 (m, 3H), 7.01 (d,  $J = 7.9$  Hz, 2H), 6.94 (d,  $J = 7.6$  Hz, 2H), 3.85 (s, 3H), 3.07 (s, 3H);  **$^{19}F$  NMR** (282 MHz,  $CDCl_3$ )  $\delta$  -79.56;  **$^{13}C$  NMR** (100 MHz,  $CDCl_3$ )  $\delta$  156.56, 140.38, 139.74, 137.08, 131.51, 130.97, 130.45, 129.95, 127.04, 126.13, 124.72, 124.38, 121.80, 120.77, 116.96, 113.96, 107.09, 55.55, 44.44; **IR** (KBr,  $cm^{-1}$ ):  $\nu$  2926, 1666, 1605, 1505, 1446, 1305, 1134, 750, 540; **MS (EI)**  $m/z$  (relative intensity) 452 (100)  $[M^+]$ ; **Anal. Calcd.** For  $C_{25}H_{19}F_2NO_3S$ : C, 63.71; H, 4.01; N, 6.19. Found: C, 63.43; H, 3.98; N, 6.13.

**N-(5,5-difluoro-3-morpholinoindolo[2,1-a]isoquinolin-6(5H)-ylidene)-4-methoxyaniline (2j)**

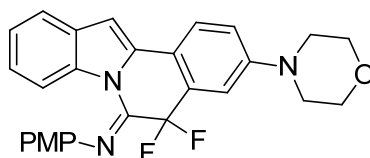

yellow solid; **mp**: 245-247°C;  **$^1H$  NMR** (300 MHz,  $CDCl_3$ )  $\delta$  8.53 (s, 1H), 7.67 (d,  $J = 8.5$  Hz, 1H), 7.53 (m, 1H), 7.24 (m, 2H), 6.96 (m, 7H), 3.83 (m, 7H), 3.18 (m, 4H);  **$^{19}F$  NMR** (282 MHz,  $CDCl_3$ )  $\delta$  -80.35 (s, 2F);  **$^{13}C$  NMR** (100 MHz,  $CDCl_3$ )  $\delta$  156.07, 151.31, 140.58, 136.34, 133.37, 130.82, 128.16 (t,  $J = 22.4$  Hz), 125.03, 123.81, 120.72, 120.66, 119.12, 117.88 (t,  $J = 5.3$  Hz), 116.61, 113.81, 110.59 (t,  $J = 4.3$  Hz), 101.83, 66.58, 55.52, 48.35; **IR** (KBr,  $cm^{-1}$ ):  $\nu$  2830, 1659, 1504, 1449, 1239, 917, 749; **MS (EI)**  $m/z$  (relative intensity) 459 (100); **HRMS (EI)** calcd. For  $C_{27}H_{23}F_2N_3O_2$ : 459.1758, Found: 459.1760.

**N-(5,5-difluoro-1-methylindolo[2,1-a]isoquinolin-6(5H)-ylidene)-4-methoxyaniline (2k)**

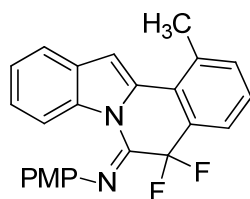

yellow solid; **mp**: 209-212 °C;  $^1\text{H NMR}$  (300 MHz,  $\text{CDCl}_3$ )  $\delta$  8.53 (d,  $J = 8.0$  Hz, 1H), 7.64 (d,  $J = 7.5$  Hz, 1H), 7.57 (d,  $J = 7.6$  Hz, 1H), 7.44 (d,  $J = 7.3$  Hz, 1H), 7.38 – 7.26 (m, 3H), 7.13 (s, 1H), 6.98 (dd,  $J = 25.5, 8.2$  Hz, 4H), 3.84 (s, 3H), 2.72 (s, 3H);  $^{19}\text{F NMR}$  (282 MHz,  $\text{CDCl}_3$ )  $\delta$  -81.77 (s, 2F);  $^{13}\text{C NMR}$  (100 MHz,  $\text{CDCl}_3$ )  $\delta$  156.21, 140.40, 136.00, 135.35, 135.14, 132.34, 130.33, 128.03, 125.92, 123.90, 123.71, 121.25, 120.74, 116.15, 113.92, 109.64, 55.51, 23.80; **IR** (KBr,  $\text{cm}^{-1}$ ):  $\nu$  2915, 2840, 1662, 1504, 1458, 1245, 1016, 748, 552; **MS (EI)**  $m/z$  (relative intensity) 389 (100) [ $\text{M}^+$ ]; **HRMS (EI)** calcd. For  $\text{C}_{24}\text{H}_{18}\text{F}_2\text{N}_2\text{O}$ : 388.1387, Found: 388.1386.

**mixture**

**of**

**N-(5,5-difluoro-2-methoxyindolo[2,1-a]isoquinolin-6(5H)-ylidene)-4-methoxyaniline (2l) and N-(5,5-difluoro-4-methoxyindolo[2,1-a]isoquinolin-6(5H)-ylidene)-4-methoxyaniline (2l')**

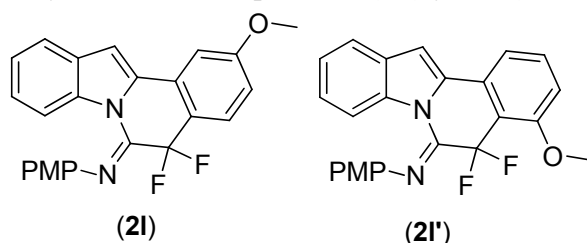

yellow solids;  $^1\text{H NMR}$  (300 MHz,  $\text{CDCl}_3$ )  $\delta$  8.60 (m, 1.1H), 7.60 (m, 1.2H), 7.50-7.46 (m, 2.2H), 7.37 – 7.19 (m, 3.5H), 7.08 (s, 1.2H), 7.05 – 6.84 (m, 4.4H), 3.85 (s, 3H), 3.84 (s, 3H);  $^{19}\text{F NMR}$  (282 MHz,  $\text{CDCl}_3$ )  $\delta$  -77.92, -81.70; **IR** (KBr,  $\text{cm}^{-1}$ ):  $\nu$  3042, 2963, 2835, 1587, 1454, 1340, 1258, 1130, 810, 538; **MS (EI)**  $m/z$  (relative intensity) 404 (100) [ $\text{M}^+$ ]; **Anal. Calcd.** For  $\text{C}_{24}\text{H}_{18}\text{F}_2\text{N}_2\text{O}_2$ : C, 71.28; H, 4.49; N, 6.93. Found: C, 71.30; H, 4.55; N, 6.89.

**Mixture of N-(2-chloro-5,5-difluoroindolo[2,1-a]isoquinolin-6(5H)-ylidene)-4-methoxyaniline (2m) and N-(4-chloro-5,5-difluoroindolo[2,1-a]isoquinolin-6(5H)-ylidene)-4-methoxyaniline (2m')**

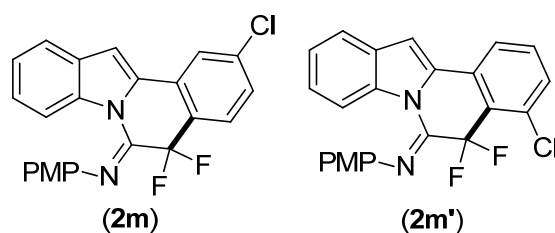

yellow solids;  $^1\text{H NMR}$  (300 MHz,  $\text{CDCl}_3$ )  $\delta$  8.60 (s, 1H), 7.78 (d,  $J = 8.5$  Hz, 1H), 7.63-7.59 (m, 1H), 7.52 – 7.20 (m, 4H), 7.11-6.92 (m, 5H), 3.85 (s, 3H);  $^{19}\text{F NMR}$  (282 MHz,  $\text{CDCl}_3$ )  $\delta$  -79.75 (s), -81.29 (s); **IR** (KBr,  $\text{cm}^{-1}$ ):  $\nu$  3080, 2915, 2835, 1664, 1505, 1454, 1239, 1047, 826, 544; **MS (EI)**  $m/z$  (relative intensity) 408 (100) [ $\text{M}^+$ ]; **HRMS (EI)** calcd. For  $\text{C}_{23}\text{H}_{15}\text{ClF}_2\text{N}_2\text{O}$ : 408.0841, Found: 408.0845.

**1-(5,5-difluoro-6-((4-methoxyphenyl)imino)-5,6-dihydroindolo[2,1-a]isoquinolin-12-yl)ethanone(2n)**

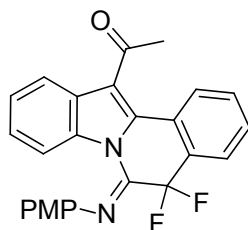

yellow solid; **mp**: 198-200°C;  $^1\text{H NMR}$  (400 MHz,  $\text{CDCl}_3$ )  $\delta$  8.51 (s, 1H), 7.88 (s, 1H), 7.78 (d,  $J = 8.8$  Hz, 1H), 7.70 (s, 1H), 7.57 (t,  $J = 7.2$  Hz, 1H), 7.48 (d,  $J = 6.4$  Hz, 1H), 7.34 (m, 2H), 7.02- 6.94 (m, 4H), 3.83 (s, 3H), 2.71 (s, 3H);  $^{19}\text{F NMR}$  (282 MHz,  $\text{CDCl}_3$ )  $\delta$  -85.46 (s, 2F);  $^{13}\text{C NMR}$  (100 MHz,  $\text{CDCl}_3$ )  $\delta$  198.96, 156.71, 140.67, 139.75, 135.69, 132.18, 131.94, 129.89, 128.33, 127.81, 126.15, 125.67, 124.68, 120.73, 119.96, 116.17, 114.01, 55.51, 31.95; **IR** (KBr,  $\text{cm}^{-1}$ ):  $\nu$  2915, 1659, 1504, 1449, 1241, 1139, 1035, 747; **MS (EI)**  $m/z$  (relative intensity) 416 (100) [ $\text{M}^+$ ]; **Anal. Calcd.** For  $\text{C}_{25}\text{H}_{18}\text{F}_2\text{N}_2\text{O}_2$ : C, 72.11; H, 4.36; N, 6.73. Found: C, 72.38; H, 4.46; N, 6.78.

**N-(5,5-difluoro-10-methylindolo[2,1-a]isoquinolin-6(5H)-ylidene)-4-methoxyaniline (2o)**

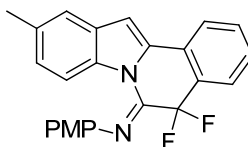

yellow solid; **mp**: 187-189 °C;  $^1\text{H NMR}$  (300 MHz,  $\text{CDCl}_3$ )  $\delta$  8.42 (s, 1H), 7.81 (d,  $J = 7.0$  Hz, 1H), 7.62 (s, 1H), 7.58 – 7.49 (m, 1H), 7.38 (s, 2H), 7.12 (s, 1H), 7.00-6.93 (m, 5H), 3.84 (s, 3H), 2.44 (s, 3H);  $^{19}\text{F NMR}$  (282 MHz,  $\text{CDCl}_3$ )  $\delta$  -79.63 (s, 2F);  $^{13}\text{C NMR}$  (100 MHz,  $\text{CDCl}_3$ )  $\delta$  156.11, 141.35 (t,  $J = 28.9$  Hz), 140.51, 134.90, 133.52, 132.85, 131.84, 130.65, 128.58, 127.11, 126.78, 110.95, 125.92, 123.55, 121.07, 120.83, 116.52, 113.86, 103.82, 55.53, 21.40; **IR** (KBr,  $\text{cm}^{-1}$ ):  $\nu$  3000, 2839, 1656, 1505, 1463, 1399, 1238, 1017, 761, 490; **MS (EI)**  $m/z$  (relative intensity) 389 (100) [ $\text{M}^+$ ]; **Anal. Calcd.** For  $\text{C}_{24}\text{H}_{18}\text{F}_2\text{N}_2\text{O}$ : C, 74.21; H, 4.67; N, 7.21. Found: C, 74.21; H, 4.76; N, 7.01.

**4-methoxy-N-(5,5,10-trifluoroindolo[2,1-a]isoquinolin-6(5H)-ylidene)aniline (2p)**

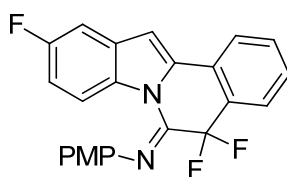

yellow solid; **mp**: 192-193 °C;  $^1\text{H NMR}$  (300 MHz,  $\text{CDCl}_3$ )  $\delta$  8.54 (s, 1H), 7.81 (d,  $J = 7.9$  Hz, 1H), 7.65 (d,  $J = 7.8$  Hz, 1H), 7.57 (t,  $J = 7.6$  Hz, 1H), 7.41 (t,  $J = 7.6$  Hz, 1H), 7.25 (d,  $J = 6.3$  Hz, 1H), 7.03-6.92 (m, 6H), 3.85 (s, 3H);  $^{19}\text{F NMR}$  (282 MHz,  $\text{CDCl}_3$ )  $\delta$  -79.70 (s, 2F), -118.72 - -118.63(m, 1F);  $^{13}\text{C NMR}$  (100 MHz,  $\text{CDCl}_3$ )  $\delta$  161.04, 158.65, 156.29, 141.23 (t,  $J = 27.2$  Hz), 140.10, 134.32, 133.00, 131.99, 131.37 (d,  $J = 9.3$  Hz), 129.08, 127.35 (t,  $J = 24.9$  Hz), 126.31, 126.01, 123.72, 120.82, 118.03, 113.88, 113.30 (d,  $J = 24.0$  Hz), 106.52 (d,  $J = 24.0$  Hz), 103.41 (d,  $J = 4.0$  Hz), 55.52; **IR** (KBr,  $\text{cm}^{-1}$ ):  $\nu$  3048, 2835, 1659, 1505, 1461, 1146, 1034, 770, 515; **MS (EI)**  $m/z$  (relative intensity) 393 (100) [ $\text{M}^+$ ]; **Anal. Calcd.** For  $\text{C}_{23}\text{H}_{15}\text{F}_3\text{N}_2\text{O}$ : C, 70.40; H, 3.85; N, 7.14. Found: C, 70.41; H, 4.06; N, 7.03.

**N-(10-bromo-5,5-difluoroindolo[2,1-a]isoquinolin-6(5H)-ylidene)-4-methoxyaniline (2q)**

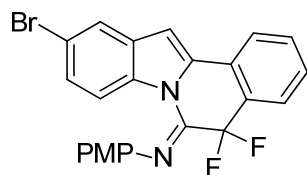

yellow solid; **mp**: 205-206 °C; **<sup>1</sup>H NMR** (300 MHz, CDCl<sub>3</sub>) δ 8.44 (d, *J* = 7.9 Hz, 1H), 7.82 (d, *J* = 7.9 Hz, 1H), 7.73 (s, 1H), 7.65 (d, *J* = 8.0 Hz, 1H), 7.57 (t, *J* = 7.5 Hz, 1H), 7.45-7.37 (m, 2H), 7.03-9.92 (m, 5H), 3.85 (s, 3H); **<sup>19</sup>F NMR** (282 MHz, CDCl<sub>3</sub>) δ -79.98 (s, 2F); **<sup>13</sup>C NMR** (100 MHz, CDCl<sub>3</sub>) δ 156.38, 139.96, 135.25, 133.98, 132.11, 132.02, 129.18, 128.38, 127.38 (t, *J* = 24.9 Hz), 126.01, 123.80, 123.65, 120.80, 118.25, 117.14, 113.89, 102.81, 55.52; **IR** (KBr, cm<sup>-1</sup>): ν 3021, 2825, 1654, 1505, 1448, 1248, 1031, 902, 768, 546; **MS (ESI)** *m/z* 453 [M+H<sup>+</sup>]; **HRMS (ESI)** *m/e* calcd for C<sub>23</sub>H<sub>16</sub>F<sub>2</sub>N<sub>2</sub>O<sup>+</sup> [M+H<sup>+</sup>] 453.0409, Found: 453.04105.

**N-(5,5-difluoro-9,11-dimethylindolo[2,1-a]isoquinolin-6(5H)-ylidene)-4-methoxyaniline (2r)**

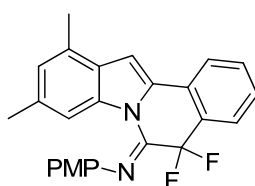

yellow solid; **mp**: 254-255 °C; **<sup>1</sup>H NMR** (300 MHz, CDCl<sub>3</sub>) δ 8.21 (s, 1H), 7.82 (d, *J* = 7.7 Hz, 1H), 7.62 (d, *J* = 7.5 Hz, 1H), 7.53 (t, *J* = 7.6 Hz, 1H), 7.36 (t, *J* = 7.5 Hz, 1H), 7.14 – 6.83 (m, 6H), 3.85 (s, 3H), 2.53 (s, 3H), 2.42 (s, 3H); **<sup>19</sup>F NMR** (282 MHz, CDCl<sub>3</sub>) δ -79.61 (s, 2F); **<sup>13</sup>C NMR** (100 MHz, CDCl<sub>3</sub>) δ 156.05, 140.60, 136.24, 131.80, 130.14, 128.27, 127.92, 126.02, 125.89, 123.38, 120.75, 114.37, 113.82, 102.60, 55.53, 22.01, 18.44; **IR** (KBr, cm<sup>-1</sup>): ν 3005, 2830, 1666, 1506, 1412, 1242, 1039, 763, 556; **MS (EI)** *m/z* (relative intensity) 403 (100) [M<sup>+</sup>]; **Anal. Calcd.** For C<sub>25</sub>H<sub>20</sub>F<sub>2</sub>N<sub>2</sub>O: C, 74.61; H, 5.01; N, 6.96. Found: C, 74.73; H, 5.12; N, 6.72.

**N-(5,5-difluoro-8-methylindolo[2,1-a]isoquinolin-6(5H)-ylidene)-4-methoxyaniline (2s)**

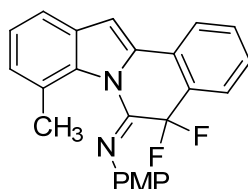

yellow solid; **mp**: 230-321 °C; **<sup>1</sup>H NMR** (300 MHz, CDCl<sub>3</sub>) δ 8.39 (s, 1H), 7.80 (d, *J* = 7.9 Hz, 1H), 7.63 (d, *J* = 7.8 Hz, 1H), 7.60 – 7.43 (m, 2H), 7.37 (t, *J* = 7.6 Hz, 1H), 7.15 – 6.89 (m, 6H), 3.85 (s, 3H), 2.46 (s, 3H); **<sup>19</sup>F NMR** (282 MHz, CDCl<sub>3</sub>) δ -78.59 (s, 2F); **<sup>13</sup>C NMR** (100 MHz, CDCl<sub>3</sub>) δ 156.11, 141.57 (t, *J* = 20.2 Hz), 140.55, 137.07, 136.12, 132.31, 131.84, 128.44, 128.15, 126.95 (t, *J* = 24.7 Hz), 125.89, 125.44, 123.45, 120.76, 116.86, 113.85, 104.07, 55.54, 22.10; **IR** (KBr, cm<sup>-1</sup>): ν 3003, 2830, 1660, 1506, 1400, 1242, 1023, 764, 482; **MS (EI)** *m/z* (relative intensity) 389 (100) [M<sup>+</sup>]; **HRMS (EI)** calcd. For C<sub>24</sub>H<sub>18</sub>F<sub>2</sub>N<sub>2</sub>O: 388.1387, Found: 388.1384.

**N-(6,6-difluoropyrrolo[2,1-a]isoquinolin-5(6H)-ylidene)-4-methoxyaniline(4a)**

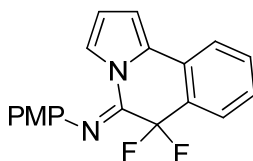

**<sup>1</sup>H NMR** (300 MHz, CDCl<sub>3</sub>) δ 7.67 – 7.40 (m, 4H), 7.40 – 7.16 (m, 1H), 6.99-6.89 (m, 4H), 6.68

(s, 1H), 6.36 (s, 1H), 3.81 (s, 3H);  $^{19}\text{F}$  NMR (282 MHz,  $\text{CDCl}_3$ )  $\delta$  -81.29 (s);  $^{13}\text{C}$  NMR (100 MHz,  $\text{CDCl}_3$ )  $\delta$  156.47, 140.65 (t,  $J = 26.1$  Hz), 139.88, 131.95, 128.26, 127.21, 126.12, 126.01, 122.31, 120.92, 119.85, 115.06, 113.81, 108.98, 55.46; IR (KBr,  $\text{cm}^{-1}$ ):  $\nu$  3140, 2835, 1661, 1609, 1505, 1452, 1421, 1275, 1040, 839, 757; MS (ESI)  $m/z$  347 [ $\text{M}+\text{Na}^+$ ]; HRMS (ESI)  $m/e$  calcd for  $\text{C}_{23}\text{H}_{16}\text{F}_2\text{N}_2\text{O}^+$  [ $\text{M}+\text{Na}^+$ ] 347.09664, Found: 347.09556.

**N-(6,6-difluoroimidazo[2,1-a]isoquinolin-5(6H)-ylidene)-4-methoxyaniline(4b)**

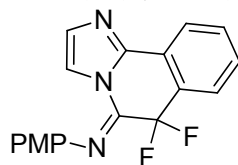

yellow solid; mp: 157-160°C;  $^1\text{H}$  NMR (300 MHz,  $\text{CDCl}_3$ )  $\delta$  8.17 (d,  $J = 7.7$  Hz, 1H), 7.75 (s, 1H), 7.62 (m, 2H), 7.49 (d,  $J = 6.5$  Hz, 1H), 7.00 (s, 1H), 6.93 (d,  $J = 7.3$  Hz, 2H), 3.84 (s, 3H);  $^{19}\text{F}$  NMR (282 MHz,  $\text{CDCl}_3$ )  $\delta$  -81.76 (s, 2F);  $^{13}\text{C}$  NMR (100 MHz,  $\text{CDCl}_3$ )  $\delta$  171.08, 157.13, 142.70, 138.66, 132.41, 131.85, 130.08, 128.65, 126.00, 124.12, 121.05, 116.26, 113.90, 55.45; IR (KBr,  $\text{cm}^{-1}$ ):  $\nu$  3144, 2907, 1687, 1505, 1414, 1266, 834, 778, 575; MS (EI)  $m/z$  (relative intensity) 325 (100) [ $\text{M}^+$ ]; Anal. Calcd. For  $\text{C}_{18}\text{H}_{13}\text{F}_2\text{N}_3\text{O}$ : C, 66.46; H, 4.03; N, 12.92. Found: C, 66.71; H, 4.11; N, 13.03.

**N-(6,6-difluoro-2-phenylpyrrolo[2,1-a]isoquinolin-5(6H)-ylidene)-4-methoxyaniline(4c)**

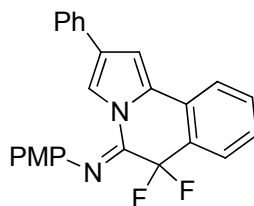

yellow solid; mp: 179-181°C;  $^1\text{H}$  NMR (400 MHz,  $\text{CDCl}_3$ )  $\delta$  7.98 (s, 1H), 7.79 – 7.58 (m, 3H), 7.54 (s, 1H), 7.49 – 7.29 (m, 5H), 7.16 – 6.79 (m, 5H), 3.88 (s, 3H);  $^{19}\text{F}$  NMR (282 MHz,  $\text{CDCl}_3$ )  $\delta$  -81.03 (s, 2F);  $^{13}\text{C}$  NMR (100 MHz,  $\text{CDCl}_3$ )  $\delta$  156.54, 139.81, 133.58, 132.00, 129.53, 129.11, 128.84, 127.50, 127.13, 126.83, 126.67, 126.43, 126.19, 126.10, 125.54, 122.38, 121.00, 115.60, 113.85, 107.09, 55.48; IR (KBr,  $\text{cm}^{-1}$ ):  $\nu$  2825, 1665, 1504, 1418, 1410, 1275, 1241, 1034, 764, 750; MS (EI)  $m/z$  (relative intensity) 400 (100); Anal. Calcd. For  $\text{C}_{25}\text{H}_{18}\text{F}_2\text{N}_2\text{O}$ : C, 74.99; H, 4.53; N, 7.00. Found: C, 75.28; H, 4.76; N, 7.08.

**N-(8-chloro-6,6-difluoro-2-phenylpyrrolo[2,1-a]isoquinolin-5(6H)-ylidene)-4-methoxyaniline (4d)**

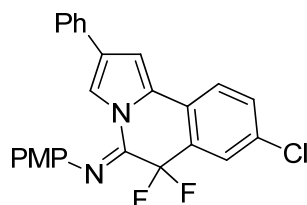

yellow solid; mp: 195-197°C;  $^1\text{H}$  NMR (300 MHz,  $\text{CDCl}_3$ )  $\delta$  7.91 (s, 1H), 7.56 (m, 3H), 7.49 – 7.35 (m, 3H), 7.35 – 7.19 (m, 2H), 6.96 (m, 5H), 3.83 (s, 3H);  $^{19}\text{F}$  NMR (282 MHz,  $\text{CDCl}_3$ )  $\delta$  -81.39 (s, 2F);  $^{13}\text{C}$  NMR (100 MHz,  $\text{CDCl}_3$ )  $\delta$  156.73, 139.51, 133.36, 133.10, 132.36, 129.69, 128.86, 127.76, 127.52, 127.24, 126.23, 125.52, 123.81, 120.99, 115.90, 113.89, 107.51, 55.49; IR (KBr,  $\text{cm}^{-1}$ ):  $\nu$  2920, 2846, 1734, 1665, 1504, 1407, 1240, 885, 833, 543; MS (EI)  $m/z$  (relative

intensity) 434 (100) [ $M^+$ ]; **Anal. Calcd.** For  $C_{25}H_{17}ClF_2N_2O$ : C, 69.05; H, 3.94; N, 6.44. Found: C, 69.20; H, 4.12; N, 6.43.

**N-(2-(tert-butyl)-6,6-difluoro-8-methoxyppyrrolo[2,1-a]isoquinolin-5(6H)-ylidene)-4-methoxyaniline(4e)**

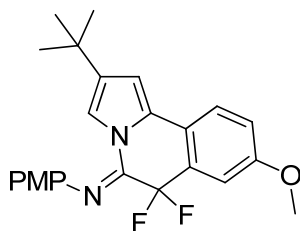

yellow solid; **mp**: 140-141°C;  $^1H$  NMR (300 MHz,  $CDCl_3$ )  $\delta$  7.49 (d,  $J = 9.0$  Hz, 1H), 7.33 (s, 1H), 7.01 (m, 2H), 6.93 (m, 4H), 6.52 (s, 1H), 3.82 (s, 3H), 3.78 (s, 3H), 1.29 (s, 9H);  $^{19}F$  NMR (282 MHz,  $CDCl_3$ )  $\delta$  -81.75 (s, 2F);  $^{13}C$  NMR (100 MHz,  $CDCl_3$ )  $\delta$  158.80, 156.26, 140.89 (t,  $J = 27.9$  Hz), 140.80, 140.22, 128.42, 127.41 (t,  $J = 24.1$  Hz), 123.89, 120.88, 120.34, 119.45, 114.98, 113.78, 113.62, 110.94, 109.48, 106.40, 55.44, 30.96, 30.87; **IR** (KBr,  $cm^{-1}$ ):  $\nu$  2975, 1671, 1506, 1045, 841, 586; **MS (EI)**  $m/z$  (relative intensity) 410 (27) [ $M^+$ ], 218 (100); **Anal. Calcd.** For  $C_{24}H_{24}F_2N_2O_2$ : C, 70.23; H, 5.89; N, 6.82. Found: C, 70.24; H, 6.07; N, 6.77.

**5,5-difluoroindolo[2,1-a]isoquinolin-6(5H)-one (2aa)**

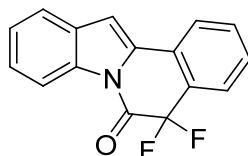

white solid; **mp**: 157-158°C;  $^1H$  NMR (300 MHz,  $CDCl_3$ )  $\delta$  8.38 (d,  $J = 8.0$  Hz, 1H), 7.84 – 7.69 (m, 2H), 7.57-7.50 (m, 2H), 7.47 – 7.22 (m, 3H), 7.01 (s, 1H);  $^{19}F$  NMR (282 MHz,  $CDCl_3$ )  $\delta$  -91.91 (2F);  $^{13}C$  NMR (100 MHz,  $CDCl_3$ )  $\delta$  158.53 (t,  $J = 31.6$  Hz), 135.82, 132.89, 132.14, 130.48, 129.34, 126.93, 126.67 (t,  $J = 3.1$  Hz), 125.73, 123.74, 121.50, 116.58, 107.91 (t,  $J = 240.5$  Hz), 107.50; **IR** (KBr,  $cm^{-1}$ ):  $\nu$  3117, 1717, 1610, 1455, 1402, 1155, 1024, 750, 491; **MS (EI)**  $m/z$  (relative intensity) 269 (100) [ $M^+$ ]; **Anal. Calcd.** For  $C_{16}H_9F_2NO$ : C, 71.37; H, 3.37; N, 5.20. Found: C, 71.34; H, 3.37; N, 5.28.

**2-(tert-butyl)-6,6-difluoro-8-methoxyppyrrolo[2,1-a]isoquinolin-5(6H)-one(4ea)**

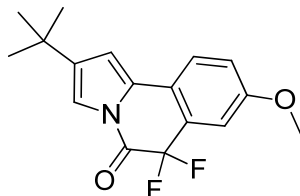

white solid; **mp**: 132-133°C;  $^1H$  NMR (300 MHz,  $CDCl_3$ )  $\delta$  7.52 (d,  $J = 8.7$  Hz, 1H), 7.18 (s, 1H), 7.16 (s, 1H), 7.06 (d,  $J = 8.9$  Hz, 1H), 6.54 (s, 1H), 3.87 (s, 3H), 1.26 (s, 3H);  $^{19}F$  NMR (282 MHz,  $CDCl_3$ )  $\delta$  -95.04 (s);  $^{13}C$  NMR (100 MHz,  $CDCl_3$ )  $\delta$  159.43, 158.14 (t,  $J = 31.4$  Hz), 143.29, 129.97, 127.32 (t,  $J = 23.3$  Hz), 124.36, 119.61, 119.33 (t,  $J = 6.1$  Hz), 112.73, 110.12, 109.15, 107.92 (t,  $J = 241.7$  Hz), 55.60, 30.83, 30.38; **IR** (KBr,  $cm^{-1}$ ):  $\nu$  3108, 2966, 1728, 1620, 1604, 1538, 1491, 1343, 1023, 754, 630; **MS (EI)**  $m/z$  (relative intensity) 305 (61) [ $M^+$ ], 290 (100); **Anal. Calcd.** For  $C_{17}H_{17}F_2NO_2$ : C, 66.87; H, 5.61; N, 4.59. Found: C, 66.90; H, 5.62; N, 4.58.

**N-(2-chloro-2,2-difluoro-1-(2-phenyl-1H-indol-1-yl)ethylidene)-4-methoxyaniline (5a)**

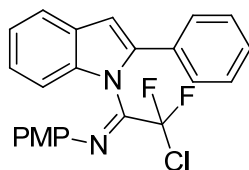

yellow solid; **mp**: 78-79 °C; **<sup>1</sup>H NMR** (300 MHz, CDCl<sub>3</sub>) δ 7.65 (d, *J* = 3.7 Hz, 1H), 7.37 – 7.24 (m, 5H), 7.21- (m, 3H), 6.79 (s, 1H), 6.67 (q, *J* = 9.0 Hz, 4H), 3.73 (s, 3H); **<sup>19</sup>F NMR** (282 MHz, CDCl<sub>3</sub>) δ -48.07 – -60.67 (m, 2F); **<sup>13</sup>C NMR** (100 MHz, CDCl<sub>3</sub>) δ 160.19, 140.27 (t, *J* = 27.3 Hz), 139.51, 136.14, 135.78, 131.79, 129.08, 128.69, 128.35, 127.38, 126.60, 123.63, 122.37 (t, *J* = 296.6 Hz), 122.04, 121.01, 114.32, 111.50, 105.90, 55.40; **IR** (KBr, cm<sup>-1</sup>): ν 3059, 2835, 1650, 1588, 1504, 1453, 1338, 979, 748, 523; **MS (ESI)** *m/z* 411 [M+H<sup>+</sup>]; **Anal. Calcd.** For C<sub>23</sub>H<sub>17</sub>ClF<sub>2</sub>N<sub>2</sub>O: C, 67.24; H, 4.17; N, 6.82. Found: C, 67.34; H, 4.22; N, 6.77.

**N-(2-bromo-2,2-difluoro-1-(1H-indol-1-yl)ethylidene)-4-methoxyaniline (6a)**

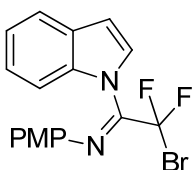

white solid; **mp**: 57-59 °C; **<sup>1</sup>H NMR** (400 MHz, CDCl<sub>3</sub>) δ 7.57 (d, *J* = 7.8 Hz, 1H), 7.23 (s, 1H), 7.09 (t, *J* = 7.4 Hz, 1H), 7.03 (t, *J* = 7.5 Hz, 1H), 6.82 (d, *J* = 7.7 Hz, 1H), 6.72 (d, *J* = 3.4 Hz, 1H), 6.63-6.57 (m, 4H), 3.65 (s, 3H).; **<sup>19</sup>F NMR** (282 MHz, CDCl<sub>3</sub>) δ -53.04 (s, 2F); **<sup>13</sup>C NMR** (100 MHz, CDCl<sub>3</sub>) δ 159.50, 140.08 (t, *J* = 26.8 Hz), 136.12, 134.45, 128.69, 125.27, 123.48, 121.71, 121.10, 114.20, 112.01, 106.79, 55.30; **IR** (KBr, cm<sup>-1</sup>): ν 3016, 2846, 1650, 1591, 1503, 1452, 1325, 959, 812, 532; **MS (EI)** *m/z* (relative intensity) 378 (50, <sup>79</sup>Br) [M<sup>+</sup>], 380 (47, <sup>81</sup>Br) [M<sup>+</sup>], 262 (100), 264 (98); **Anal. Calcd.** For C<sub>17</sub>H<sub>13</sub>BrF<sub>2</sub>N<sub>2</sub>O: C, 53.85; H, 3.46; N, 7.39. Found: C, 54.09; H, 3.58; N, 7.39.

## NMR Spectra for the Substrates and Products

1a

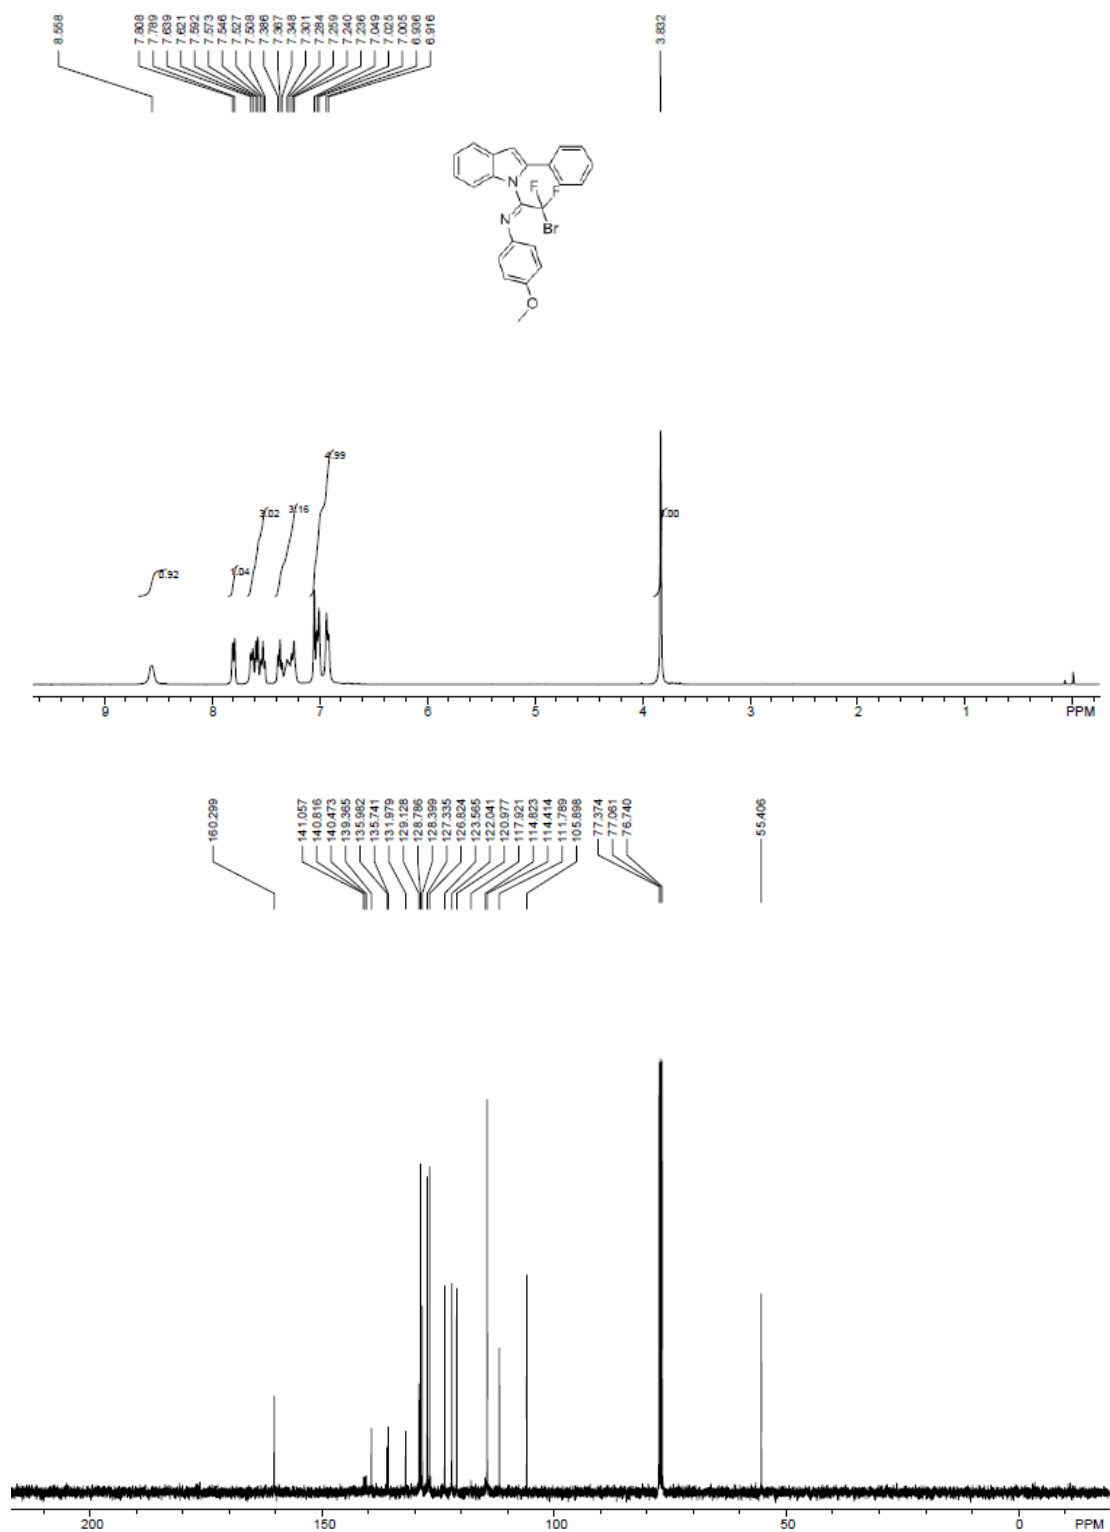



1b

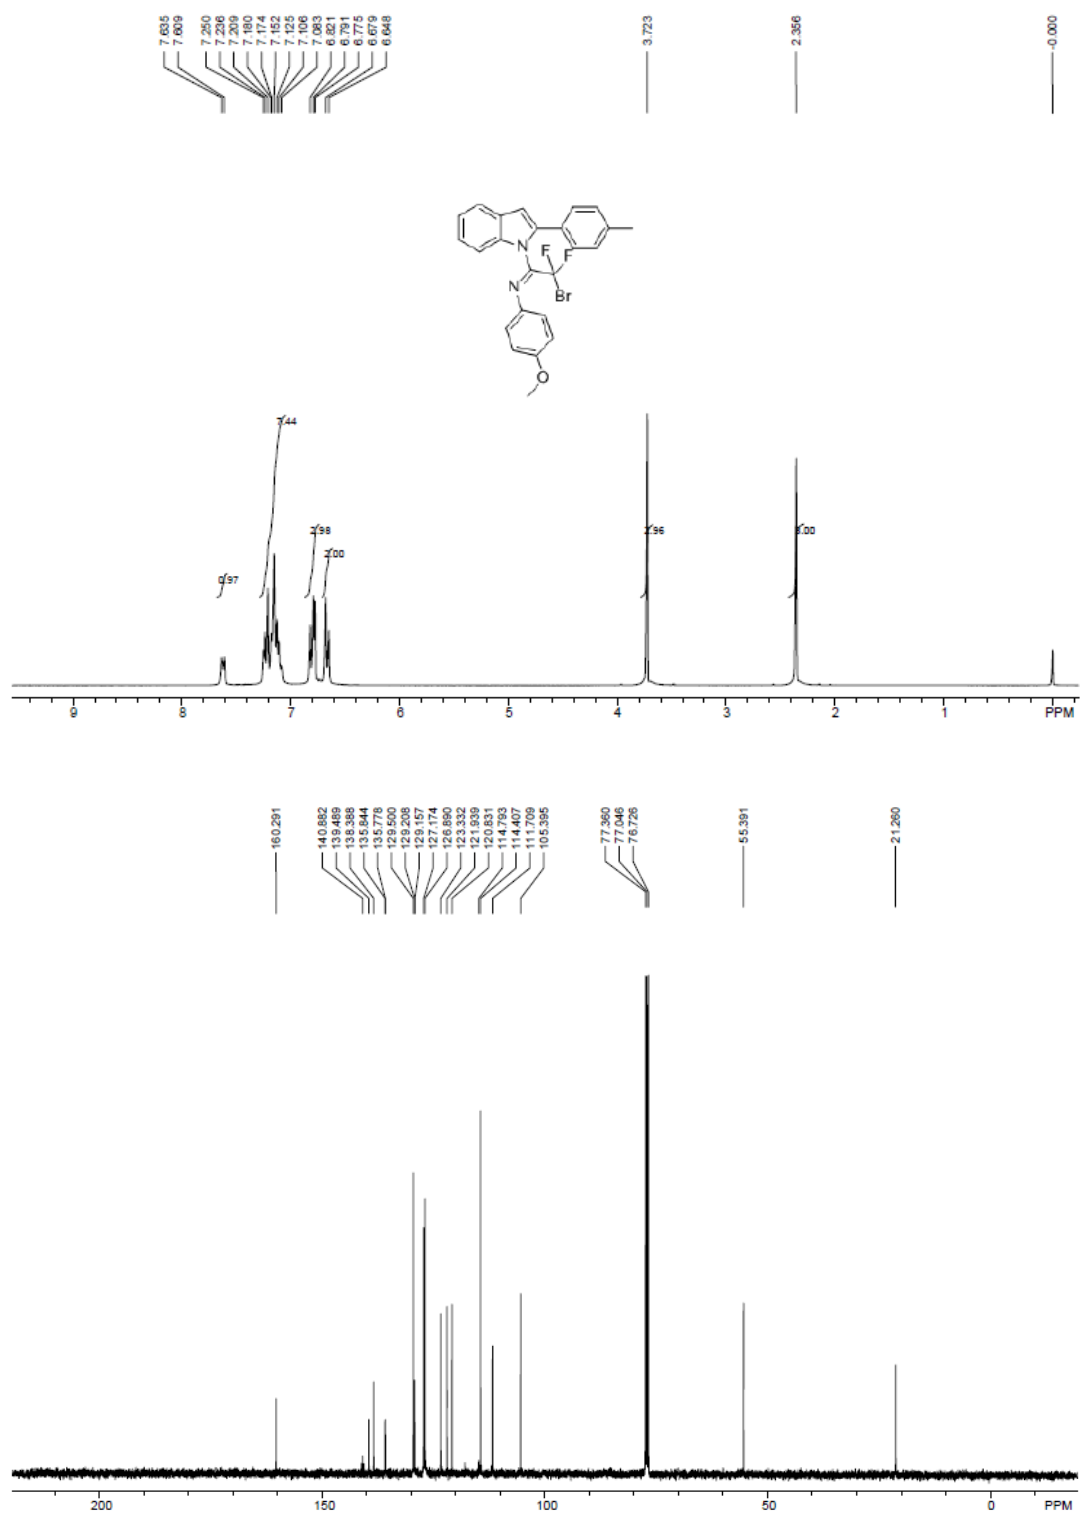

1c

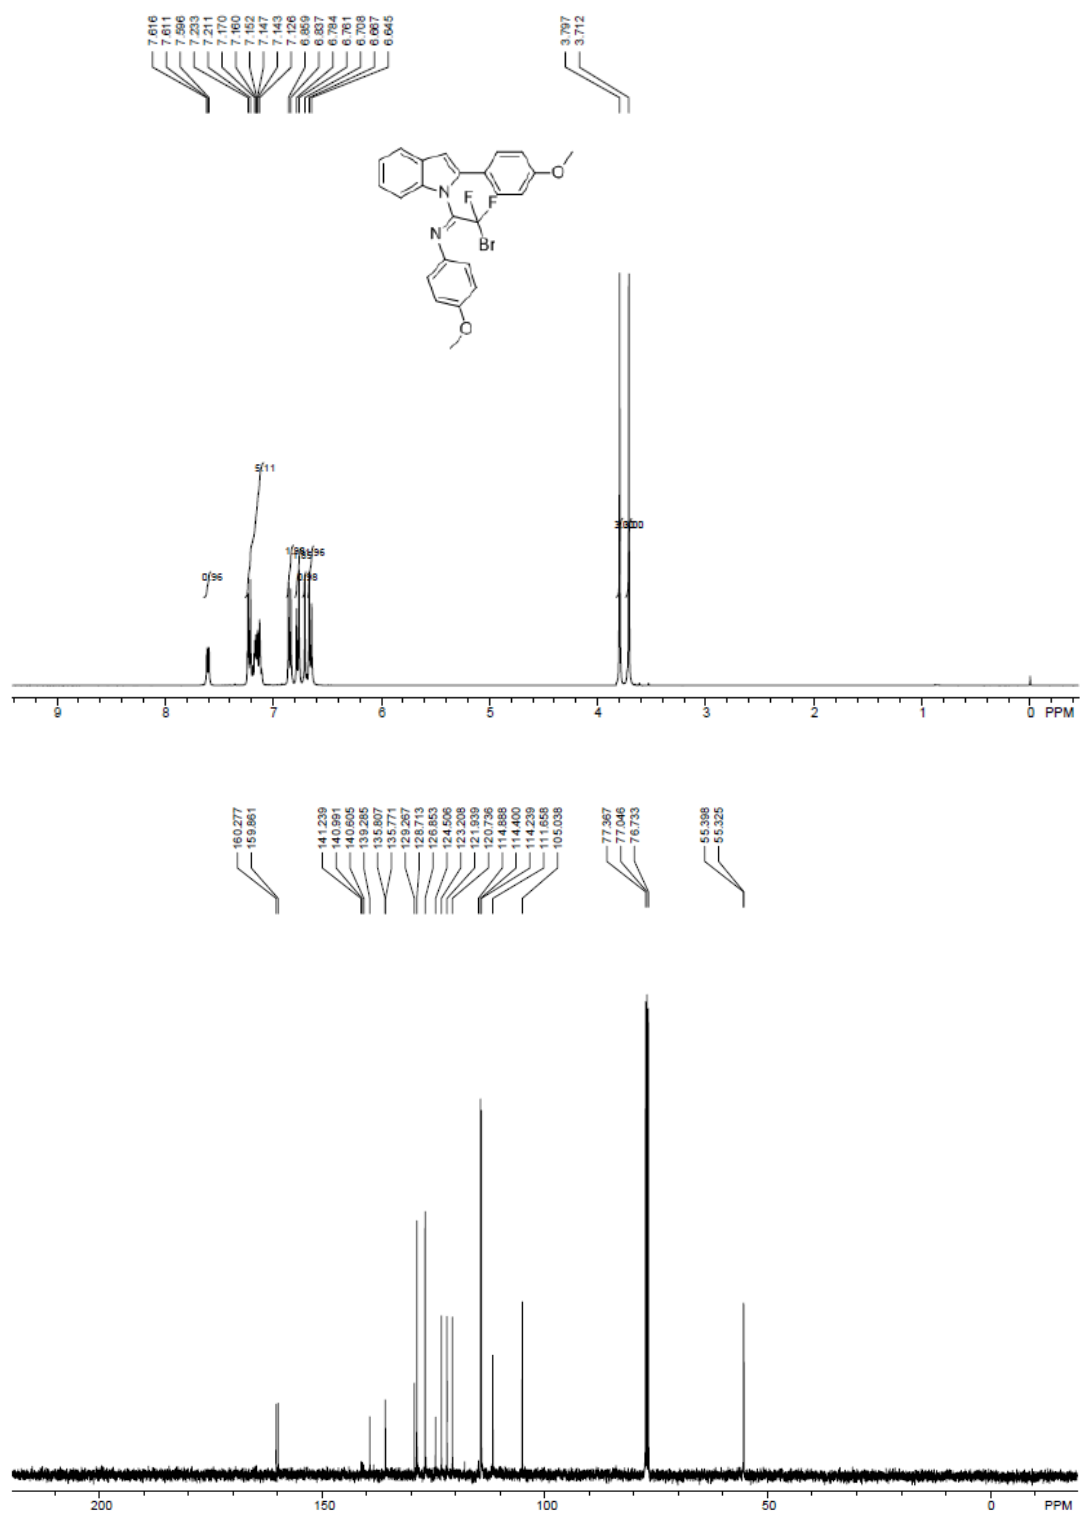

1d

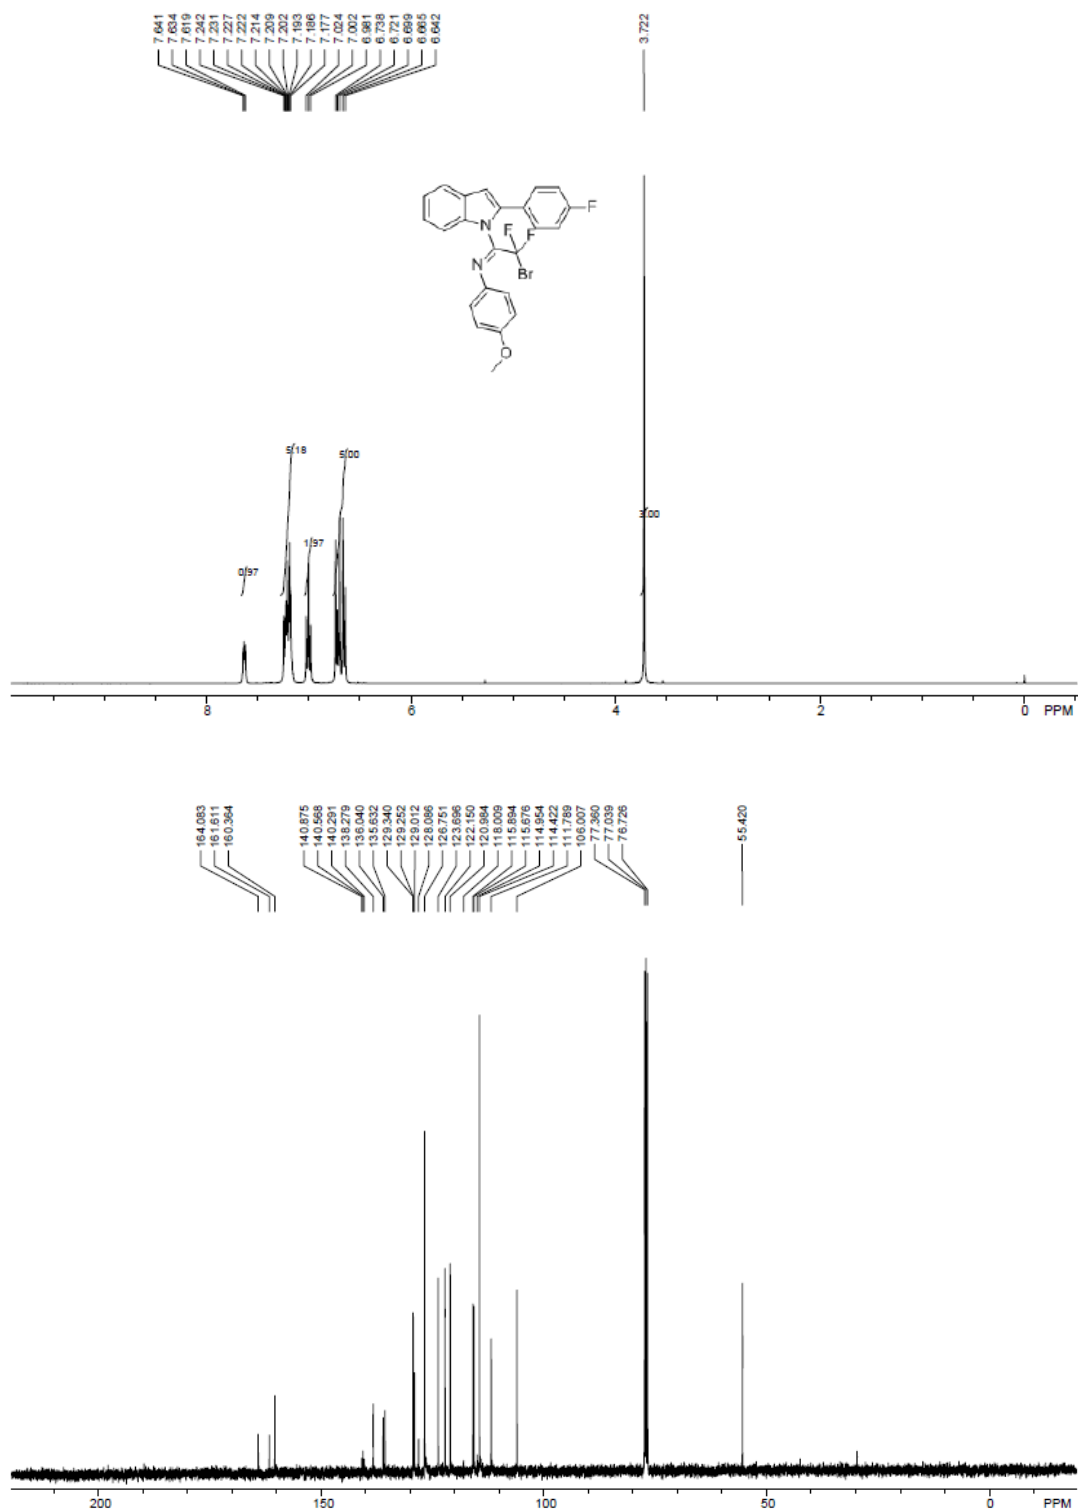

1e

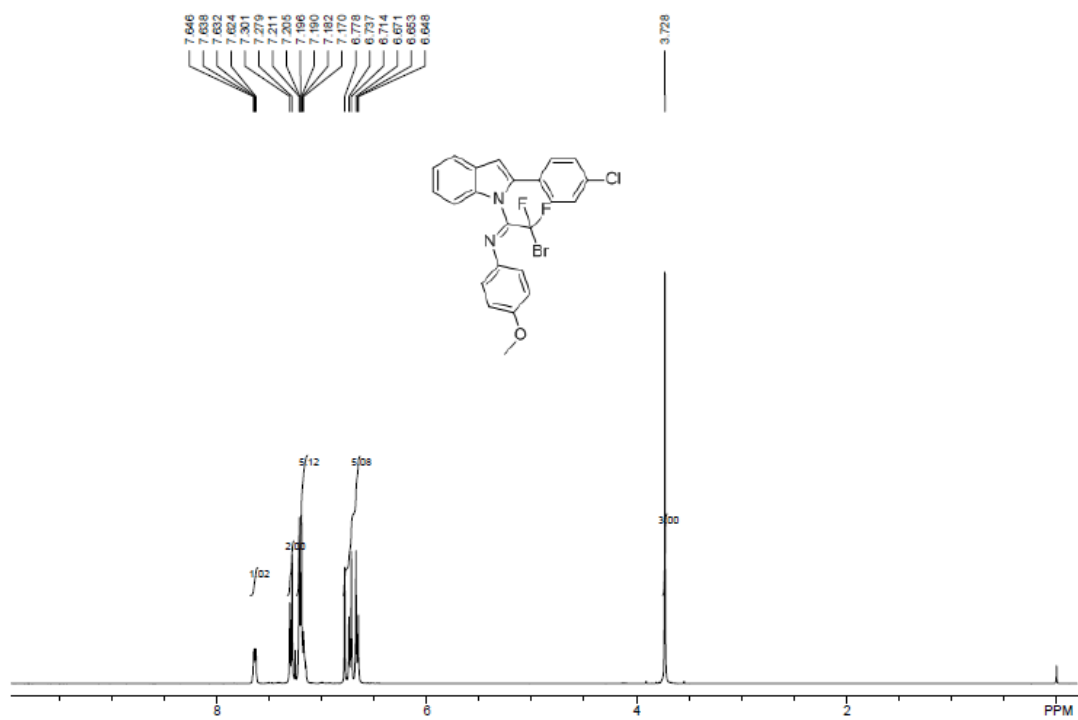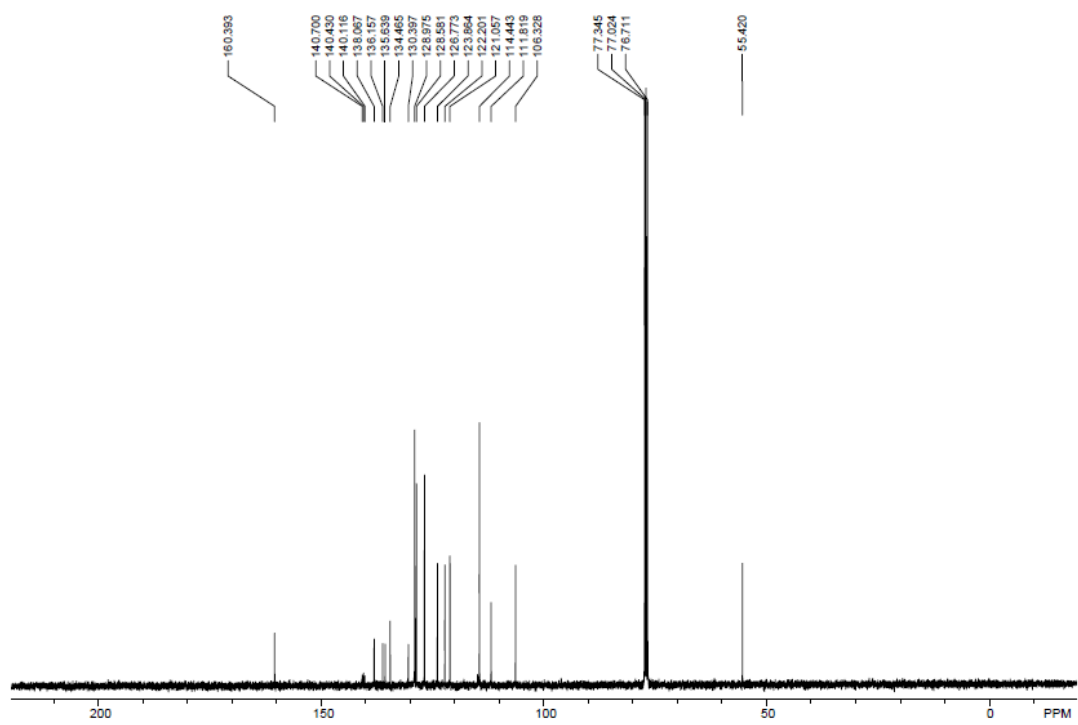

1f

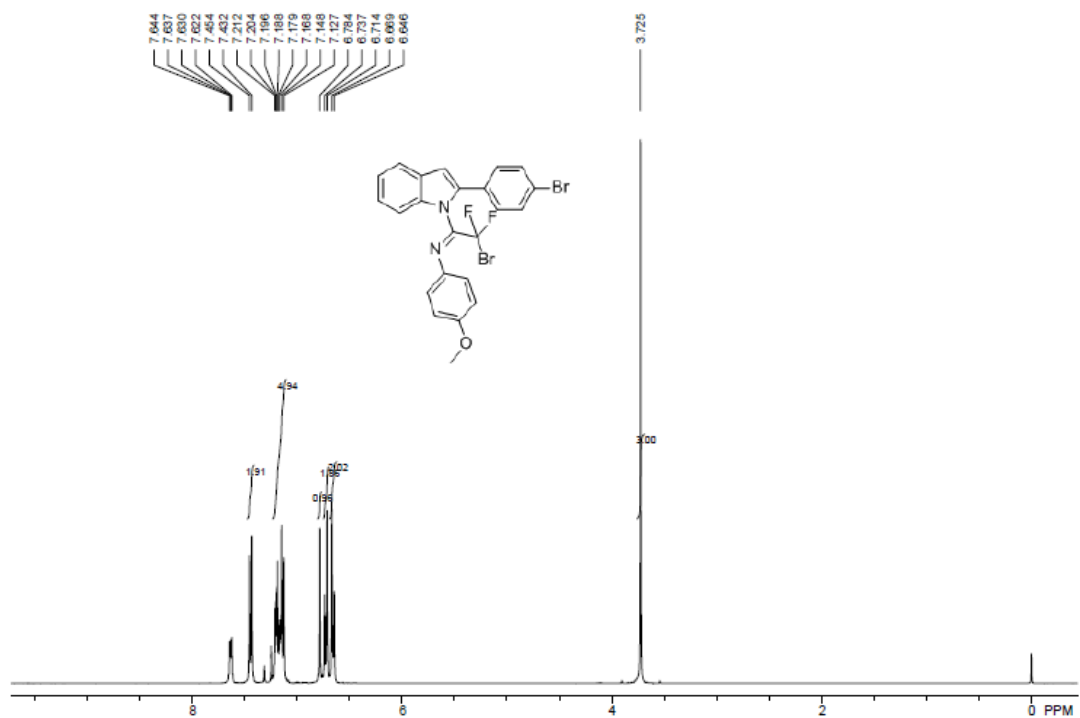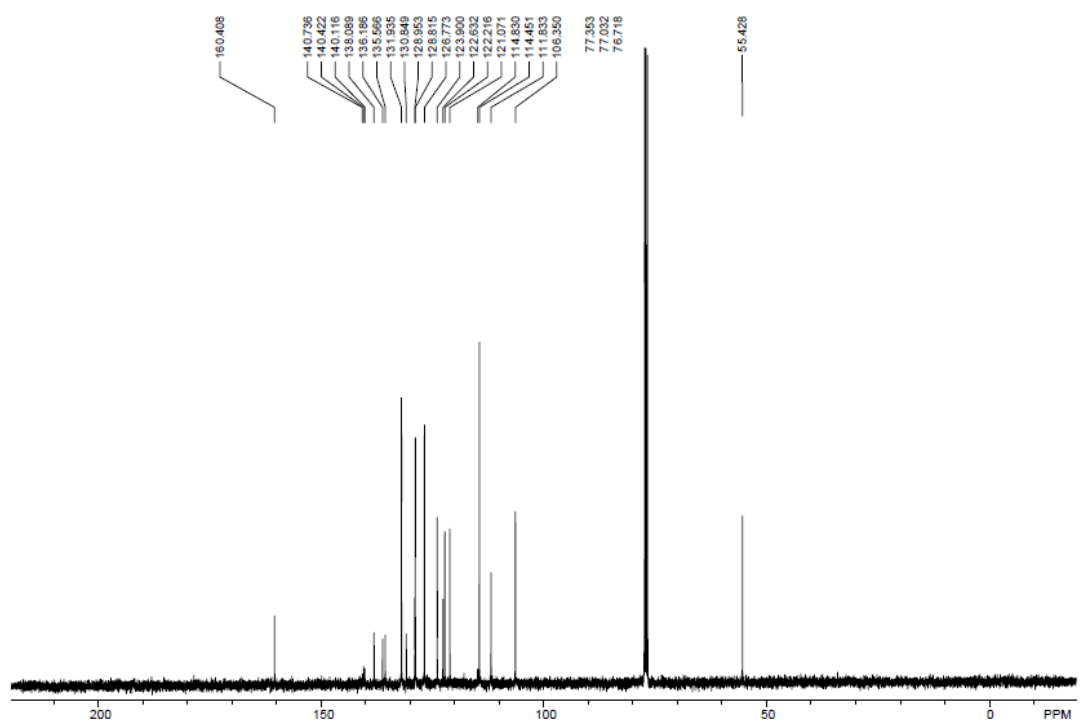

1g

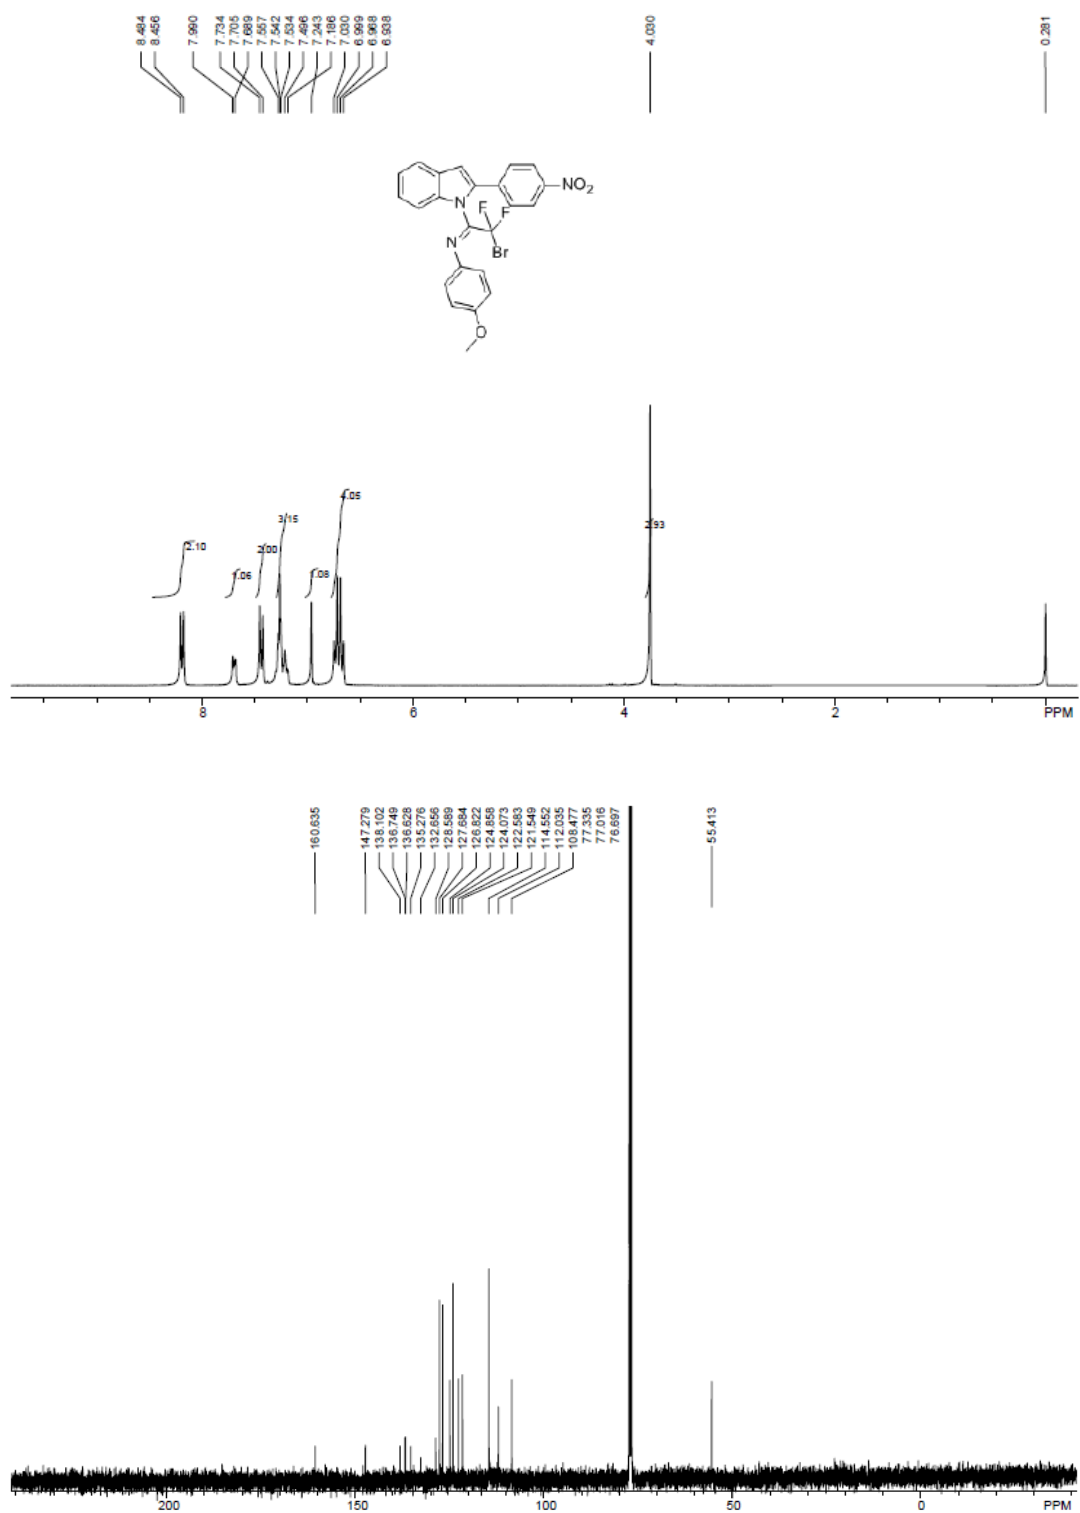

1h

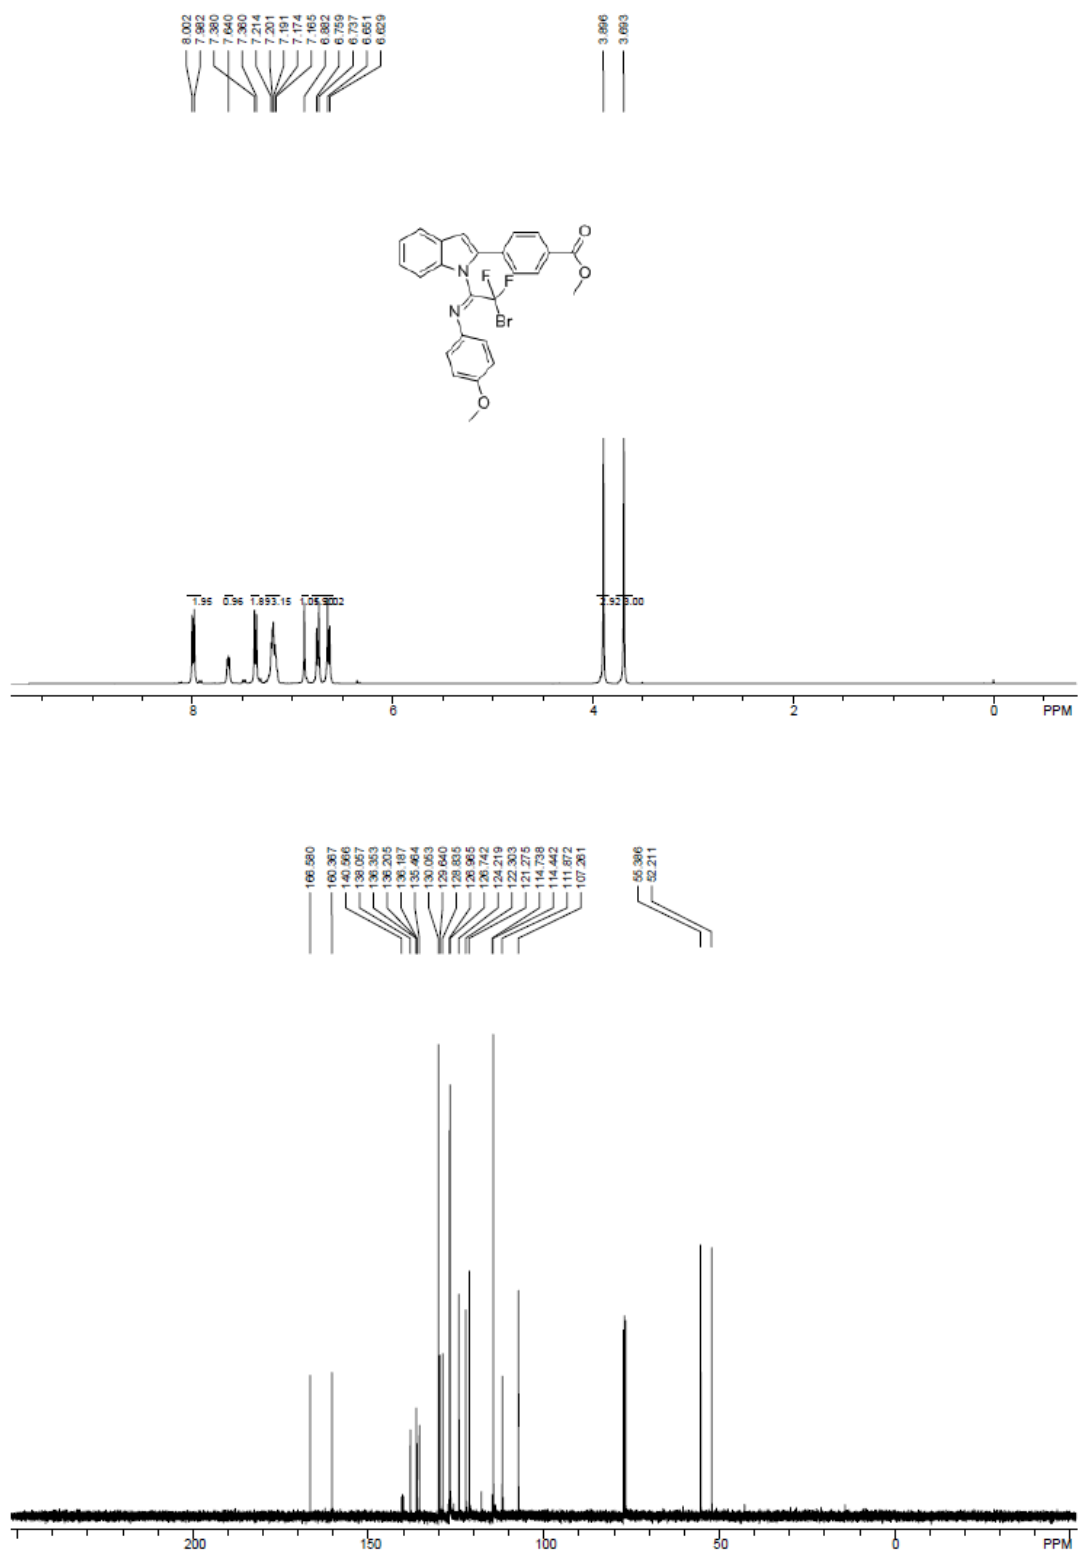

1i

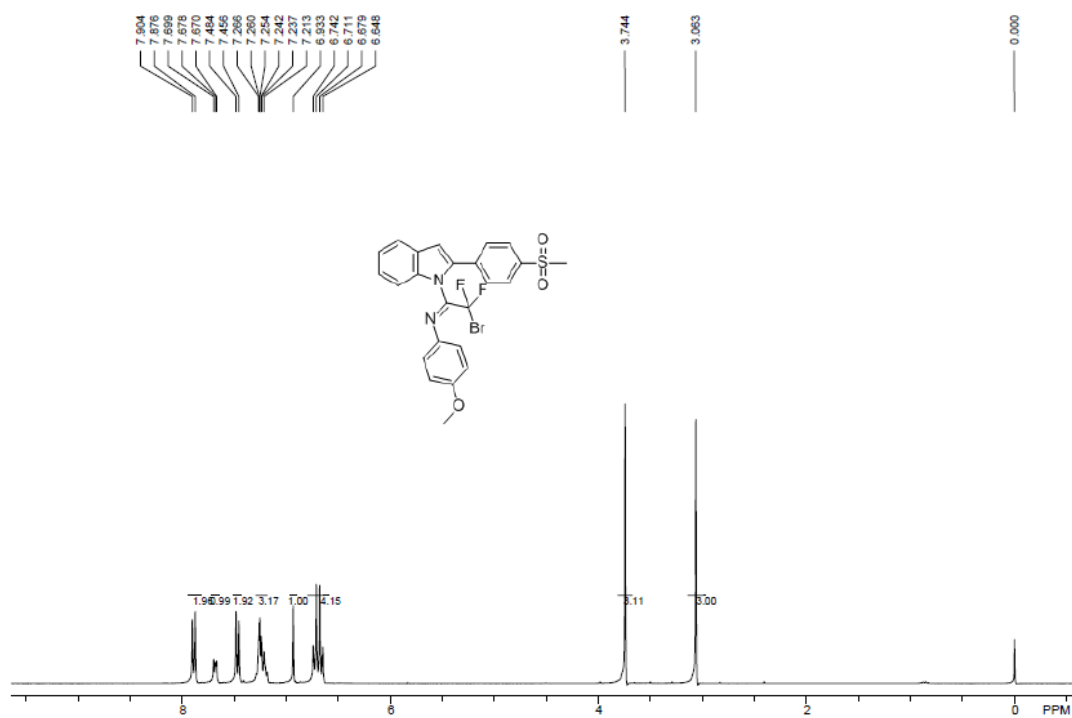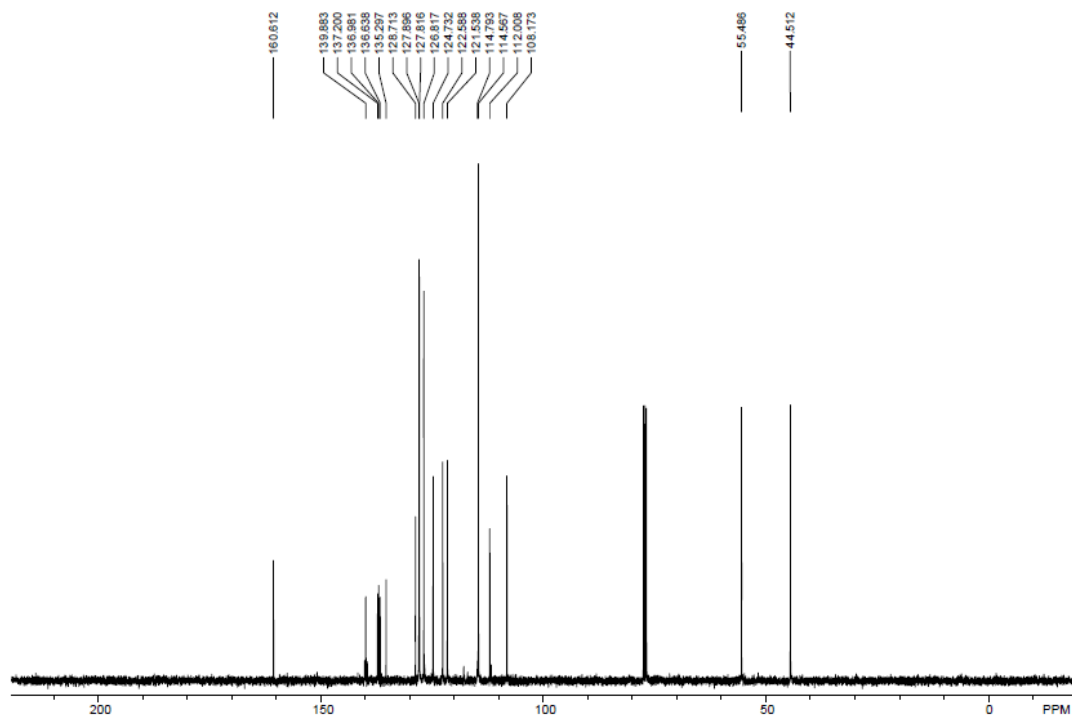



1j

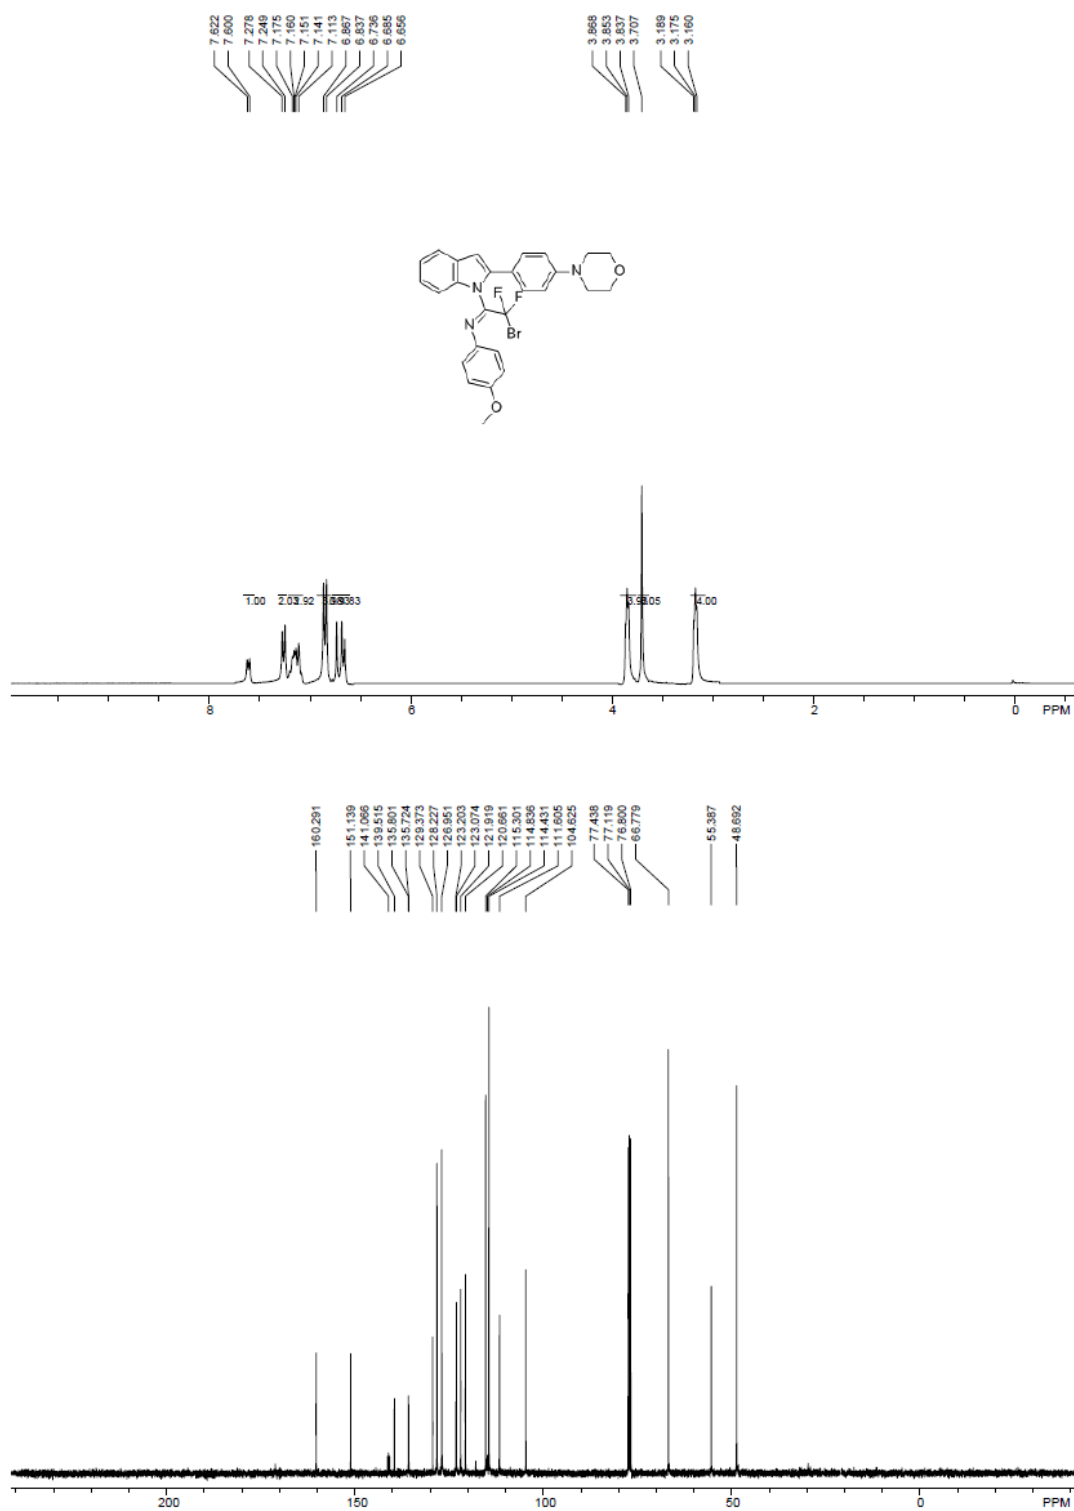

1k

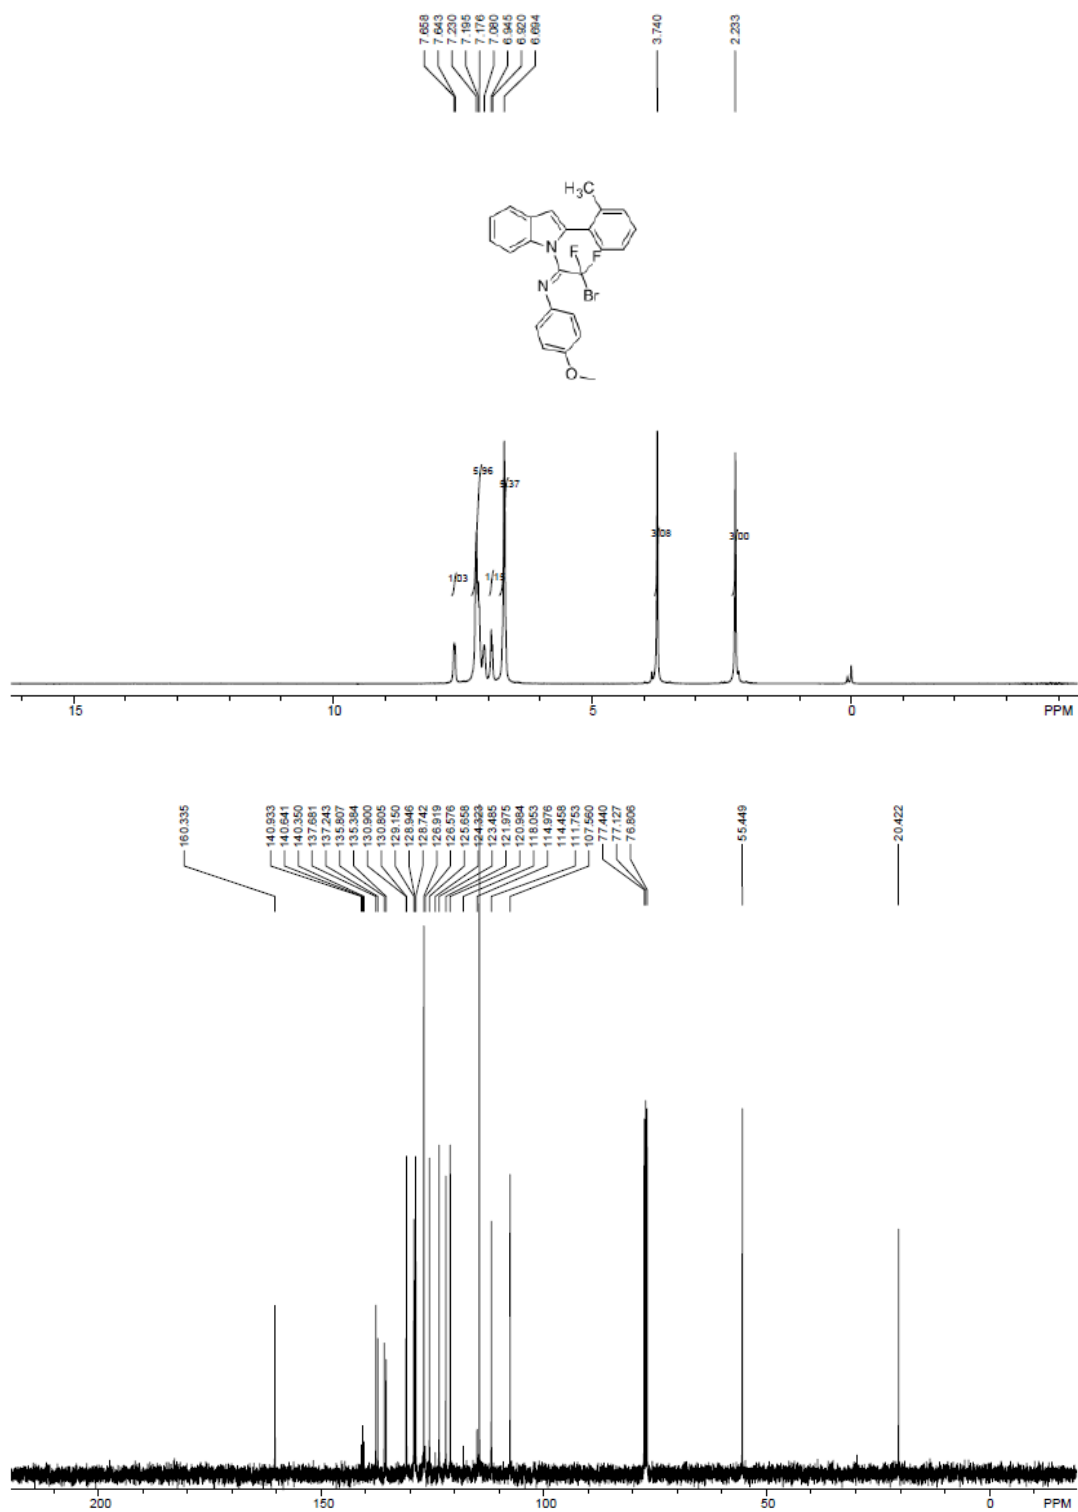

11

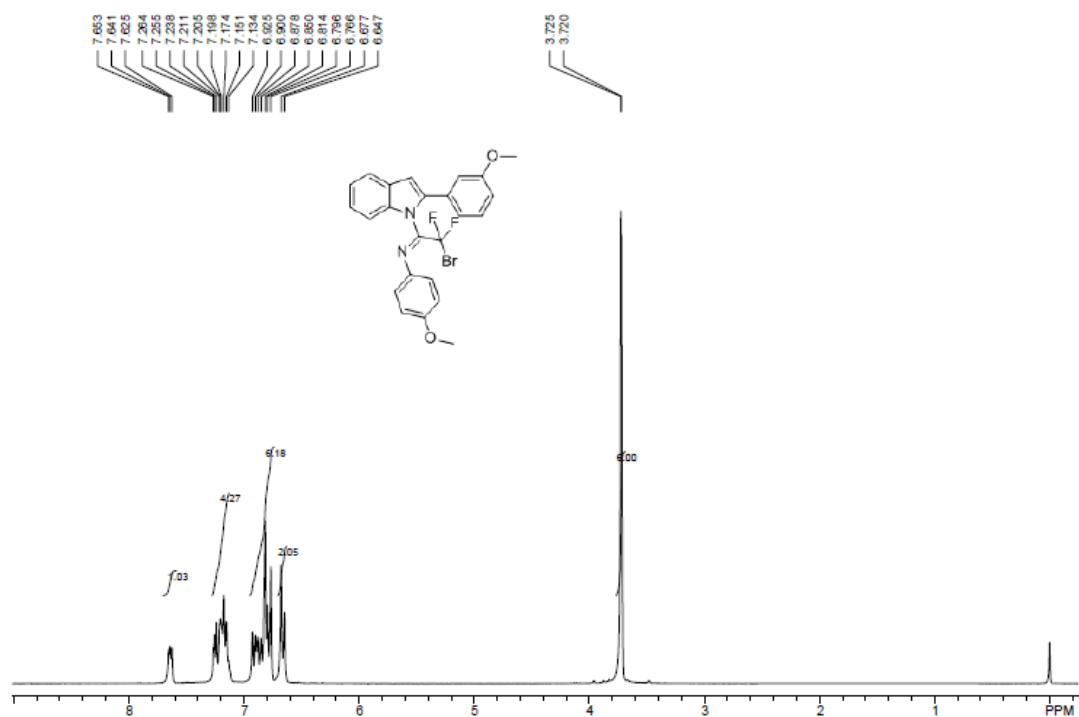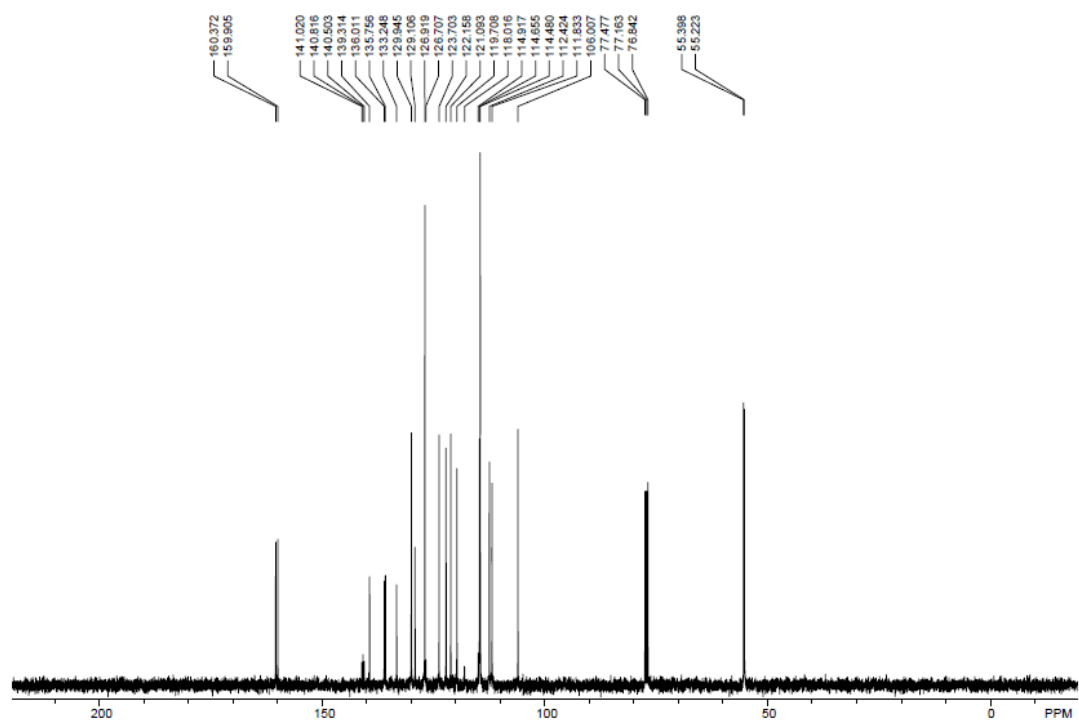

1m

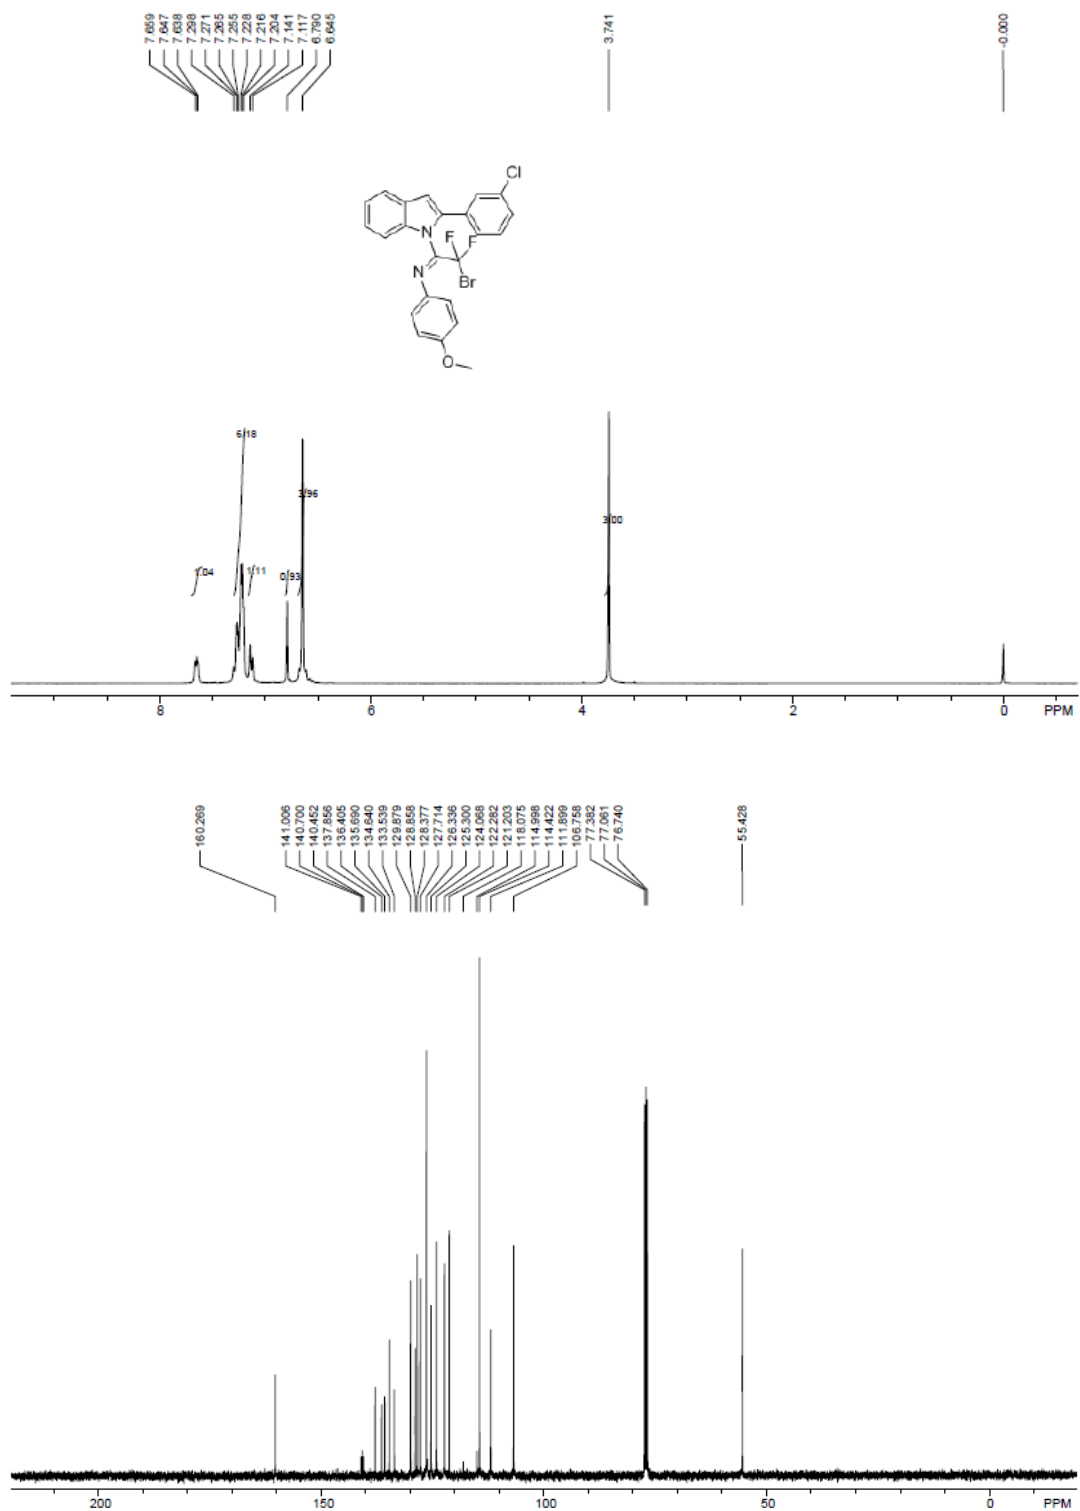

1n

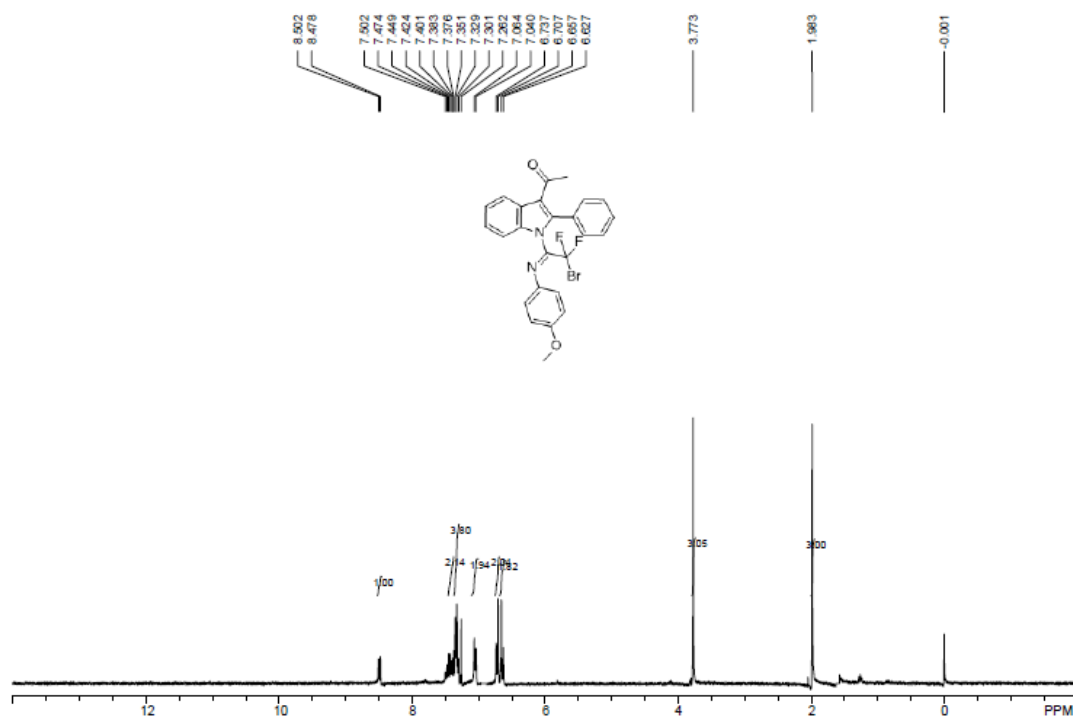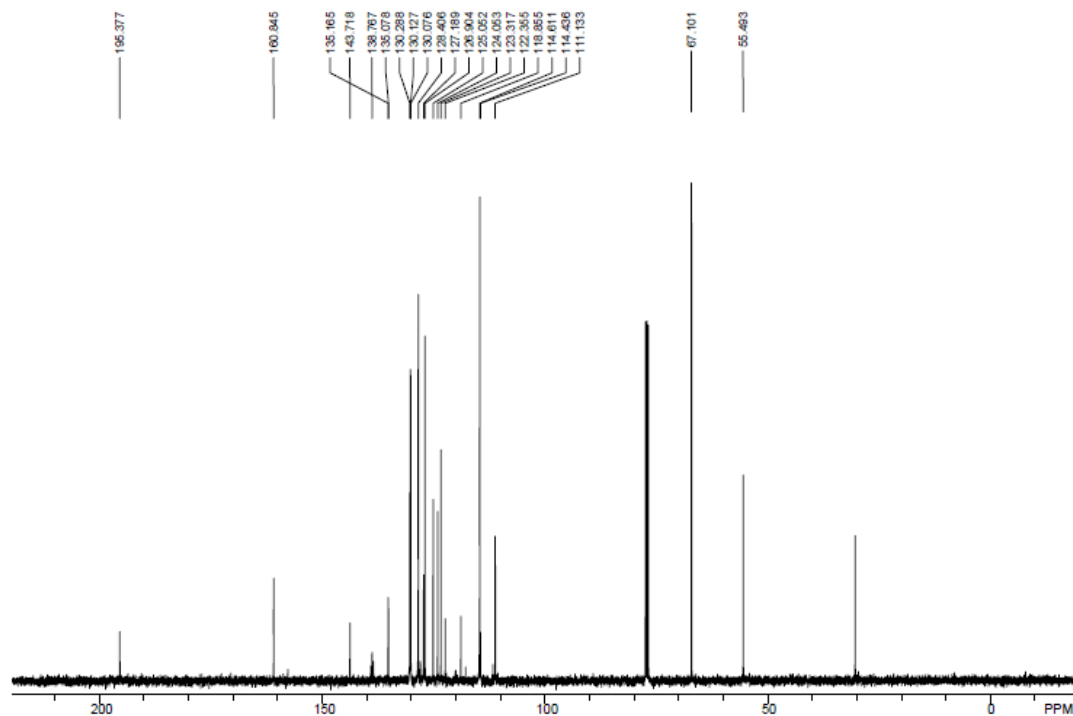

10

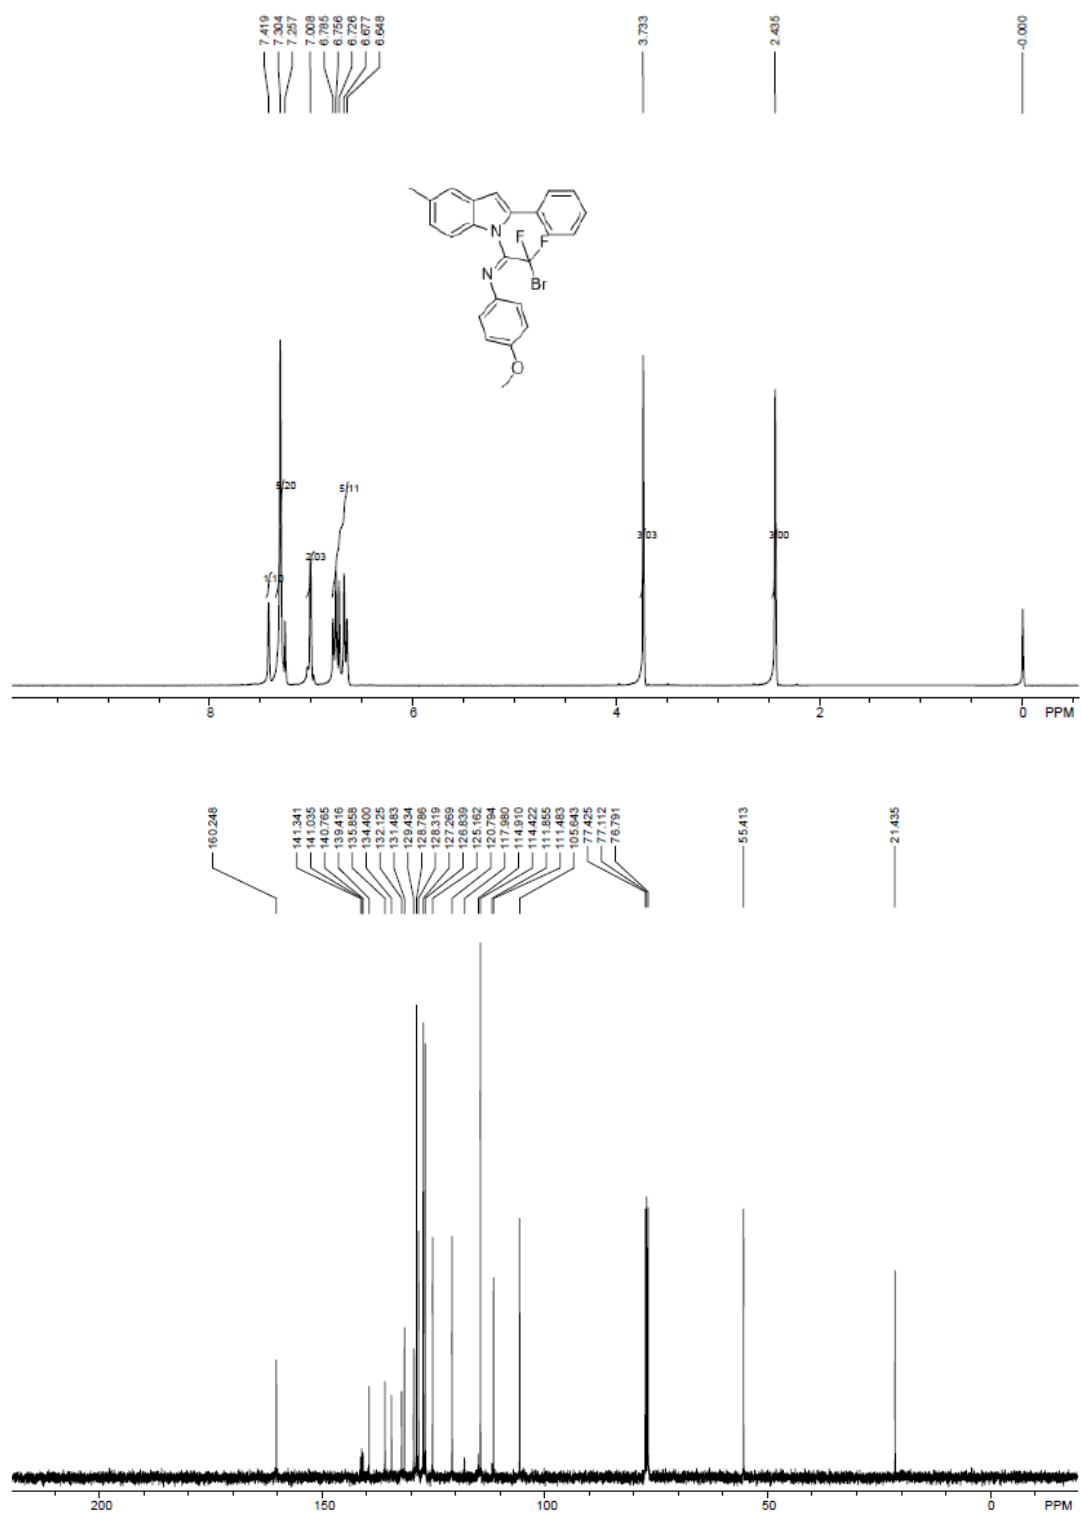

1p

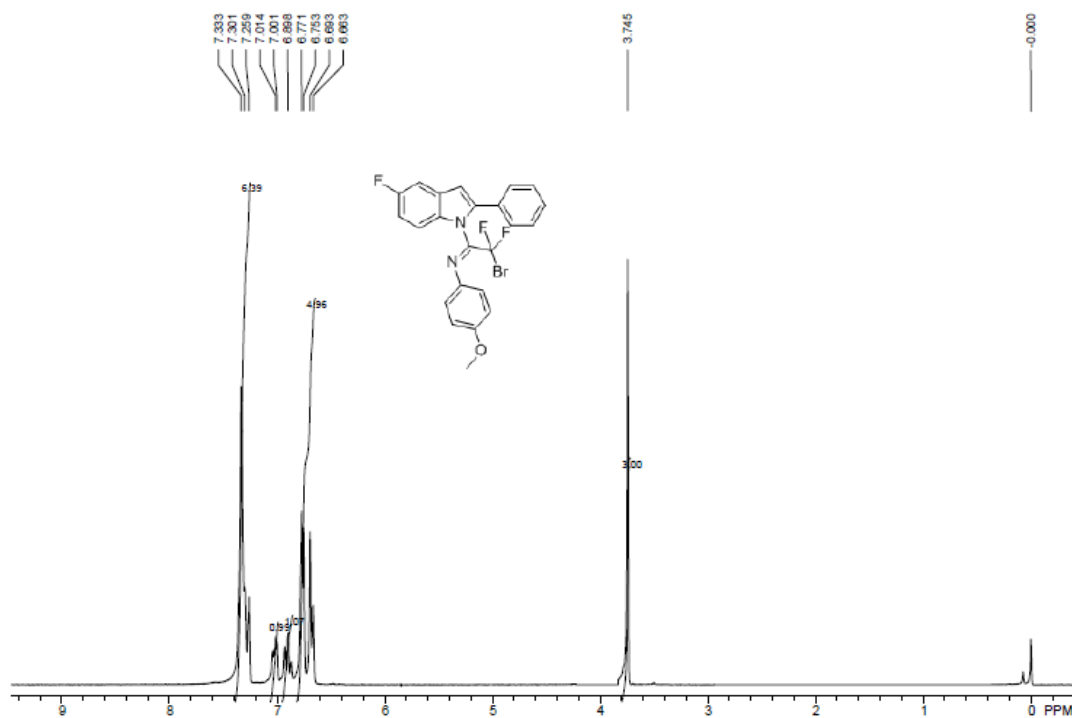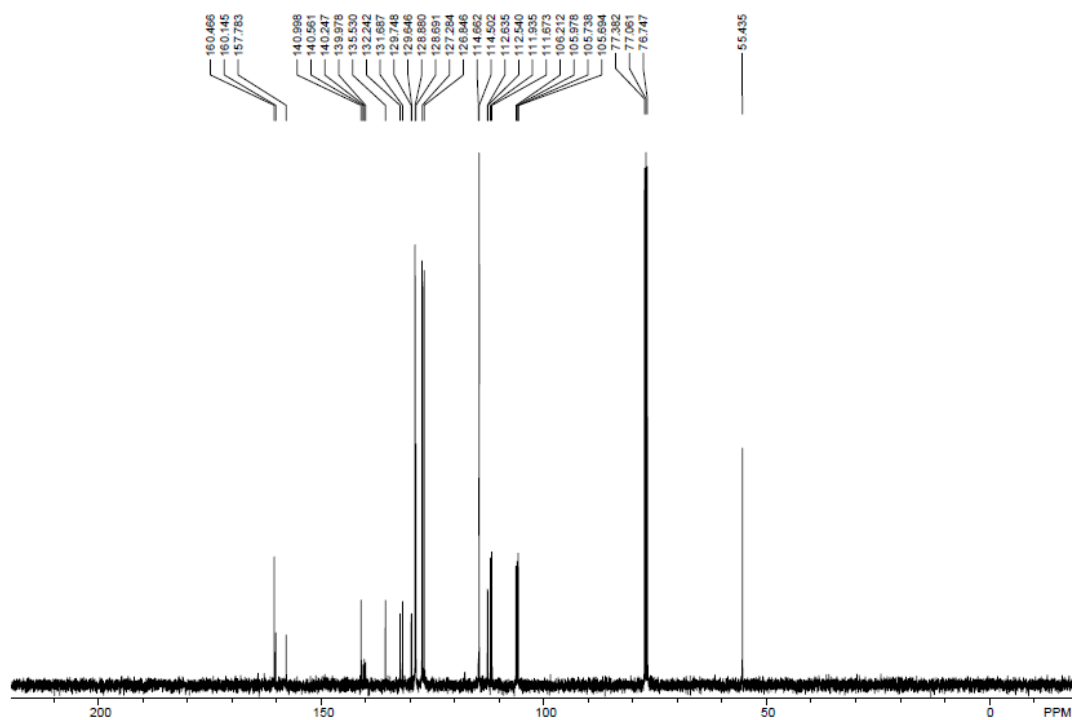

1q

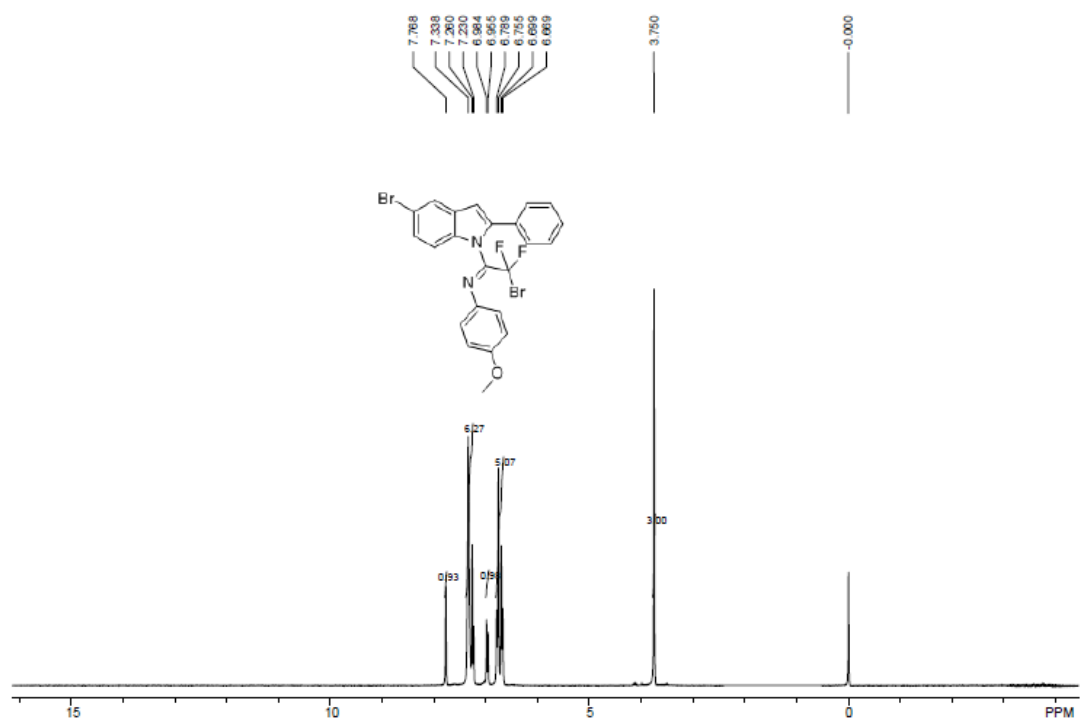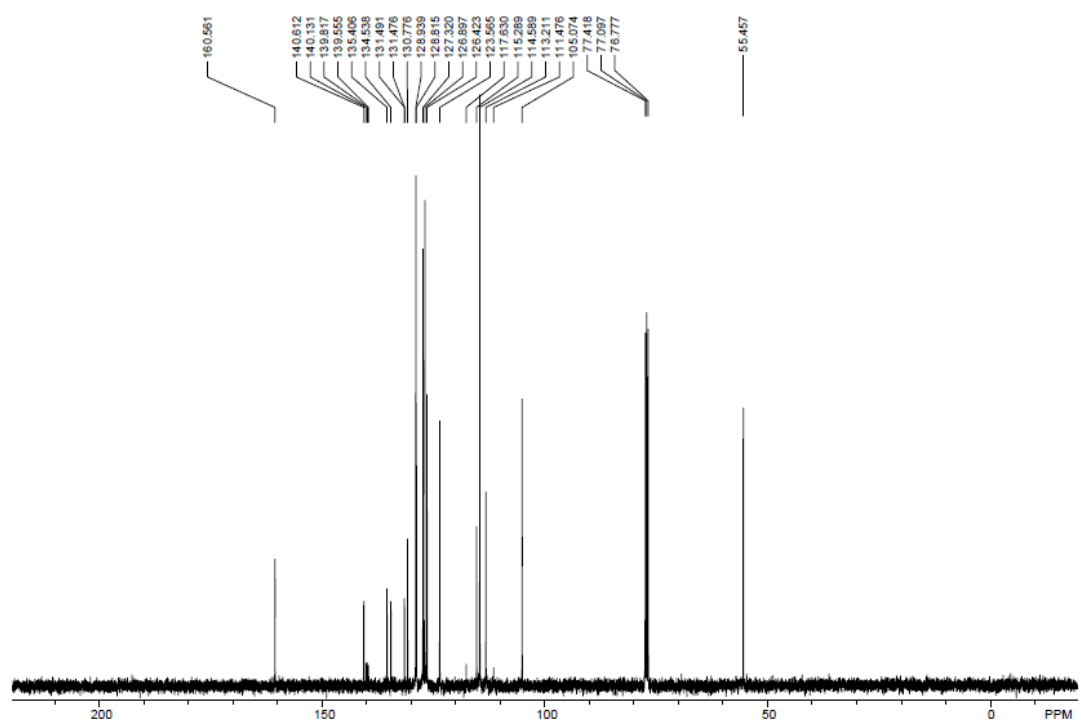



1r

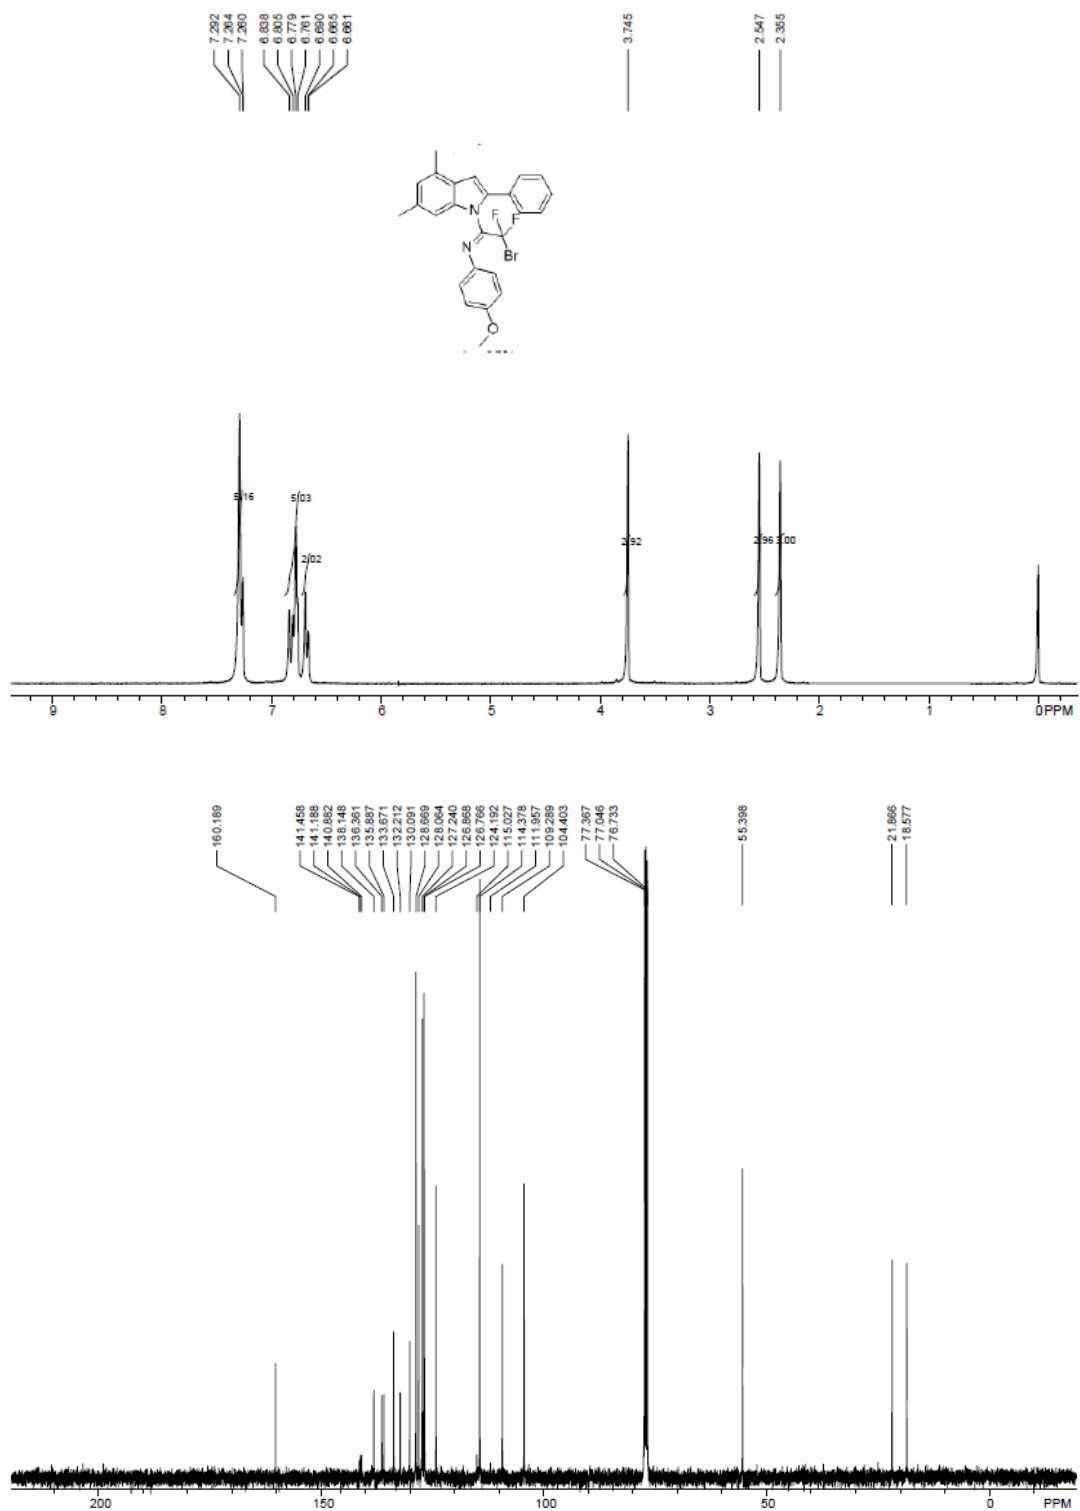

1s

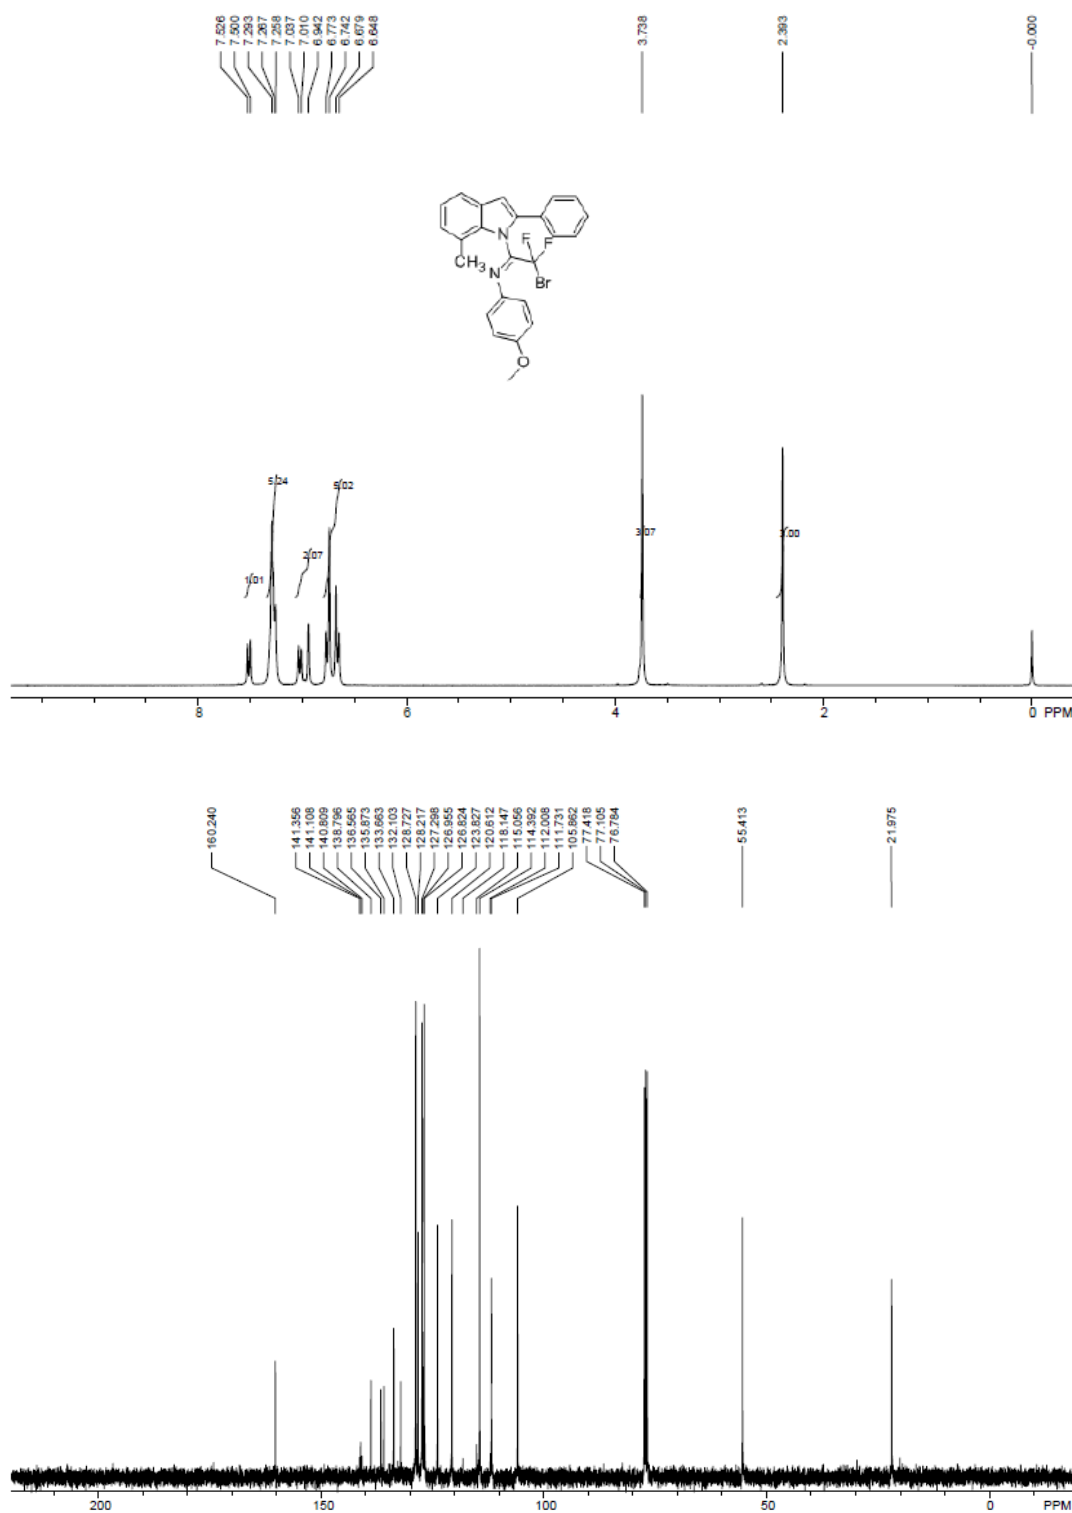

3a

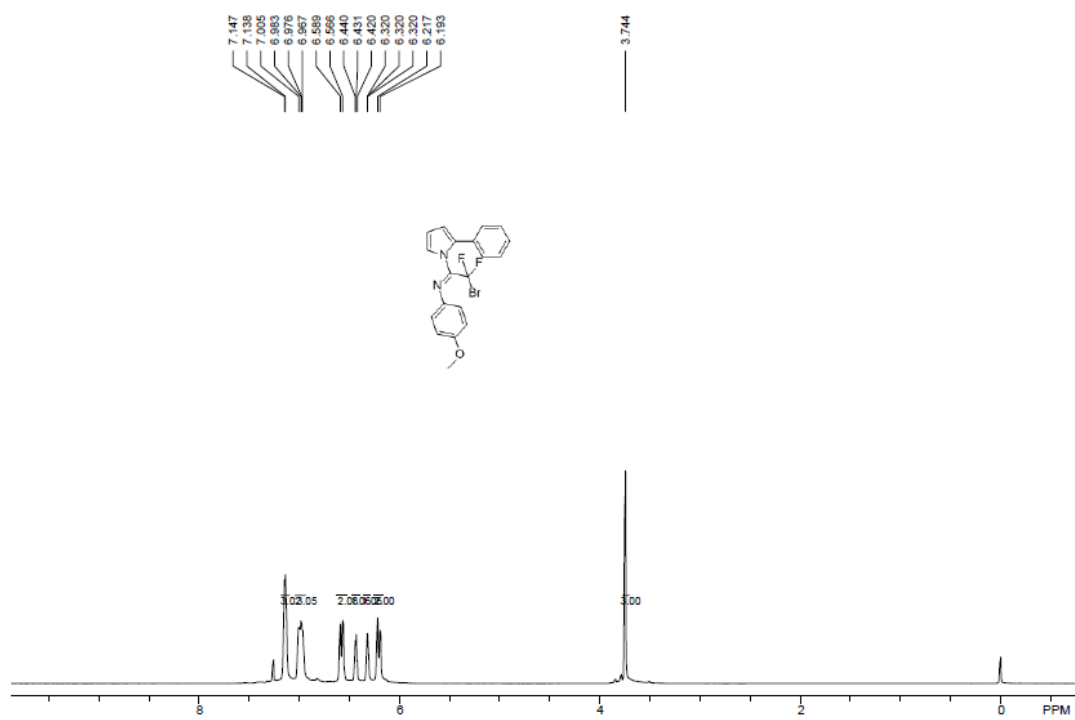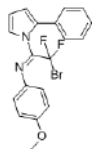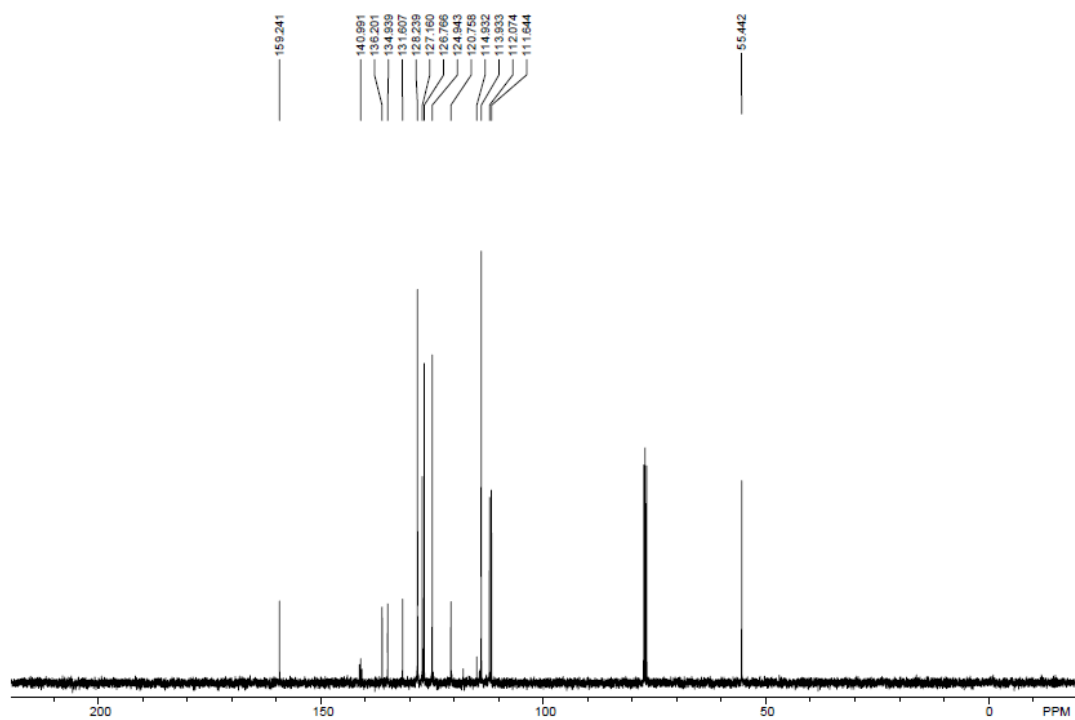

3b

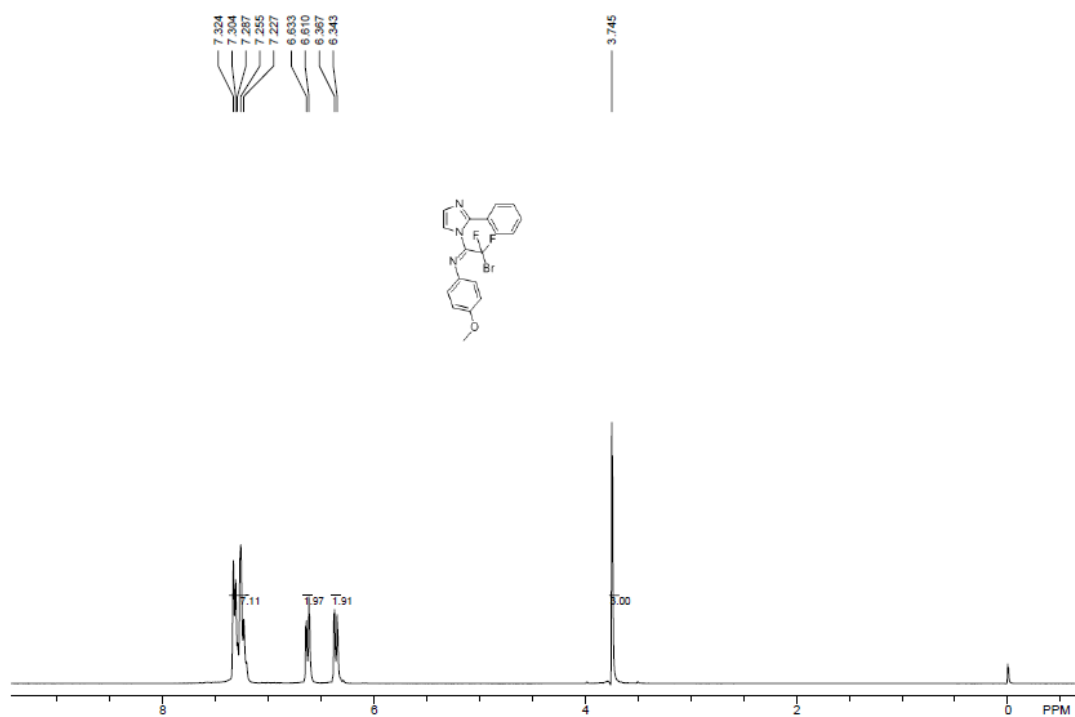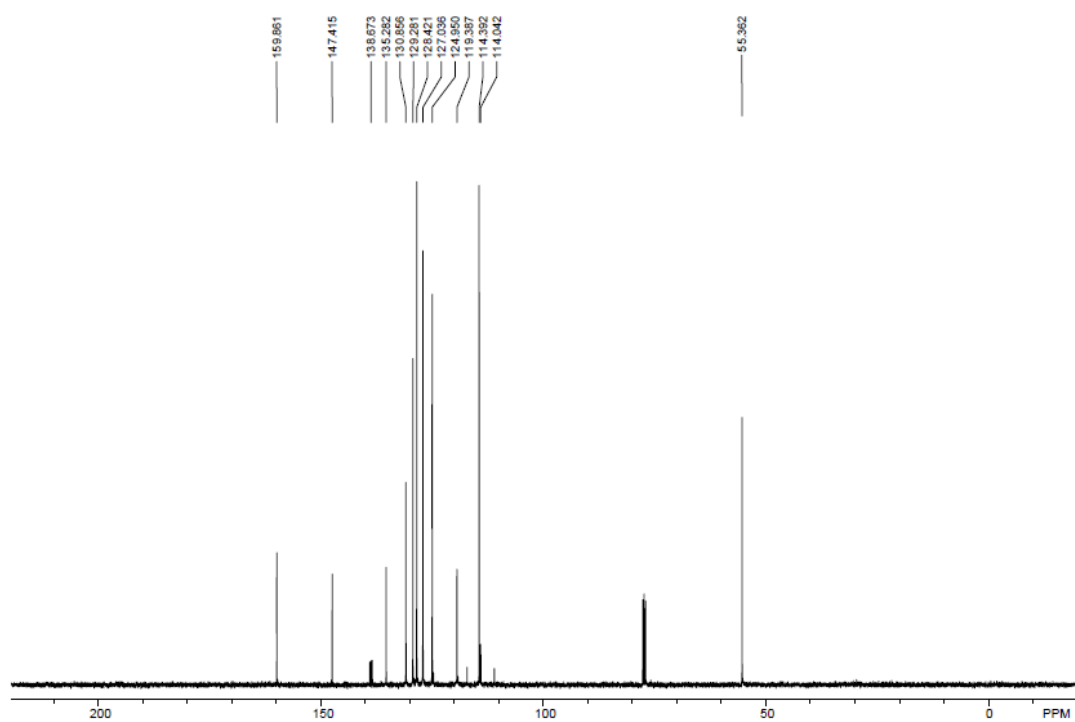

3c

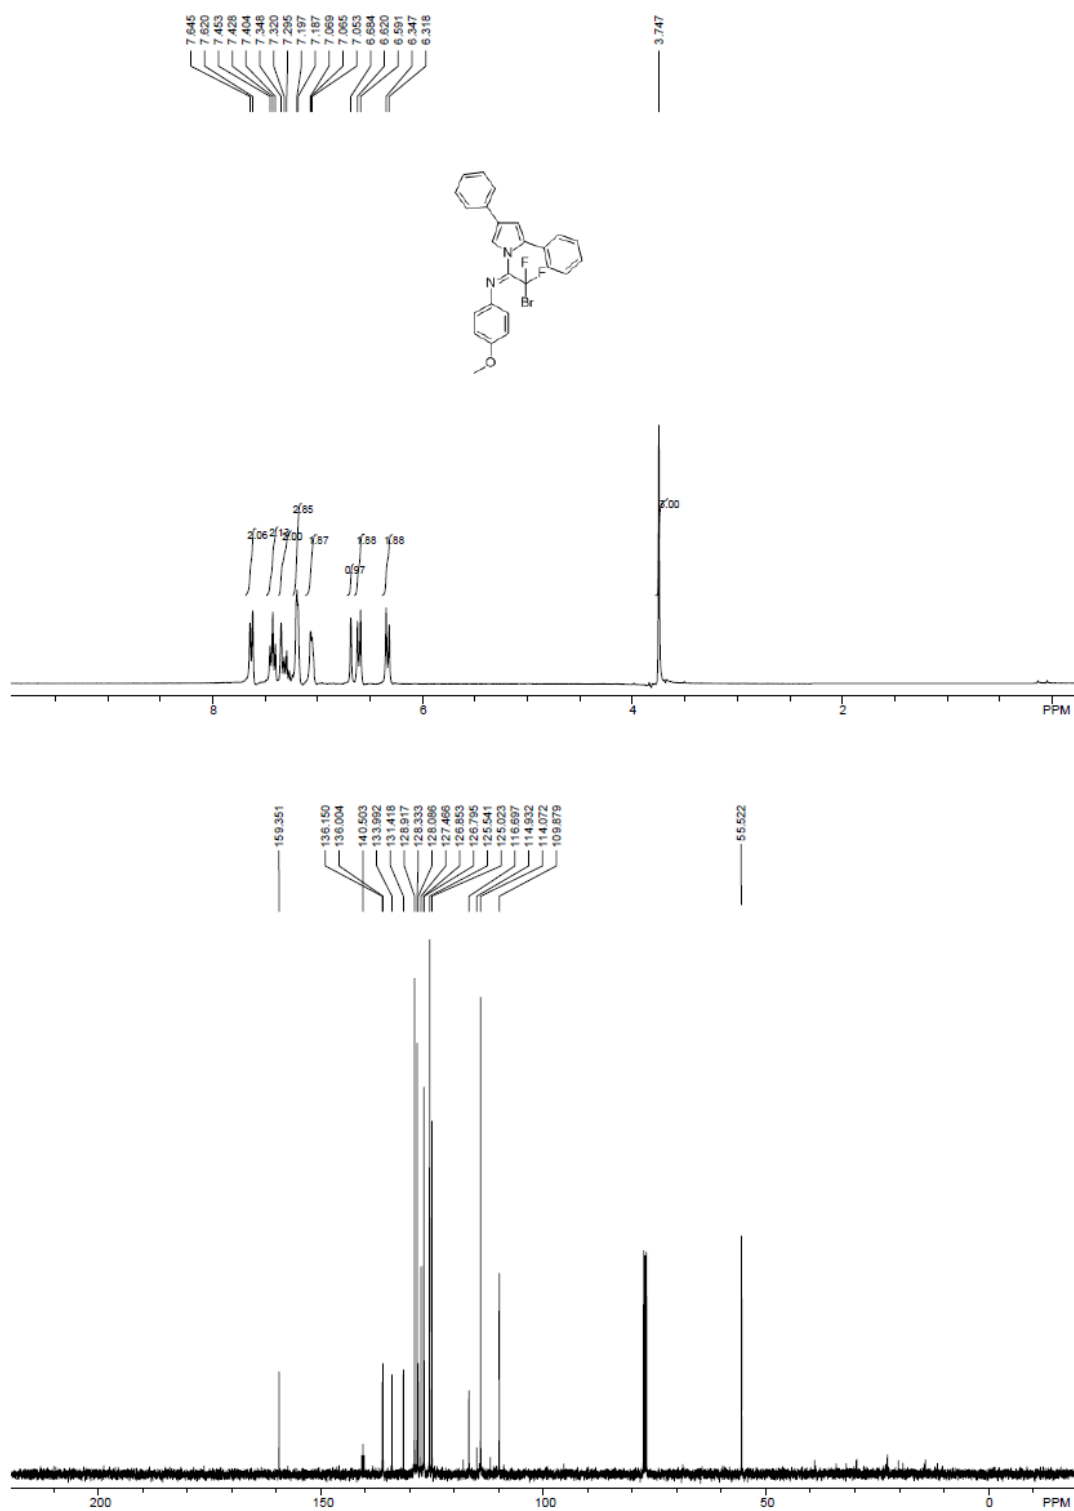

3d

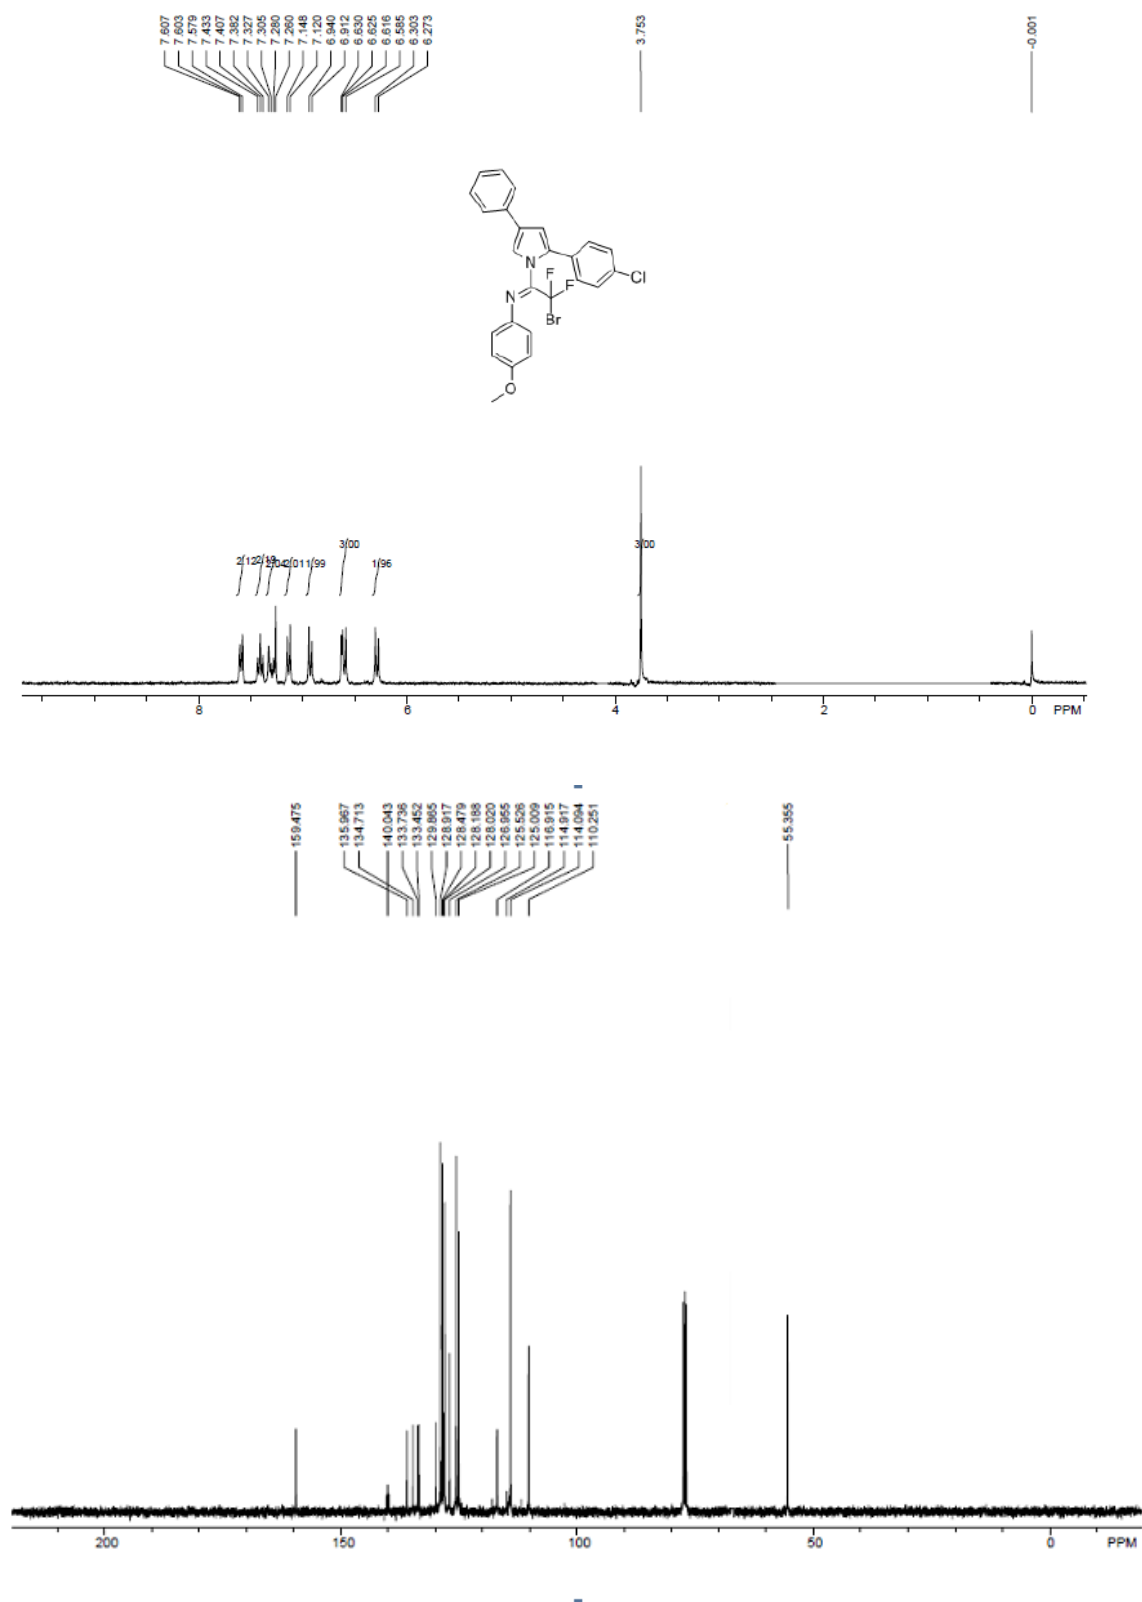

3e

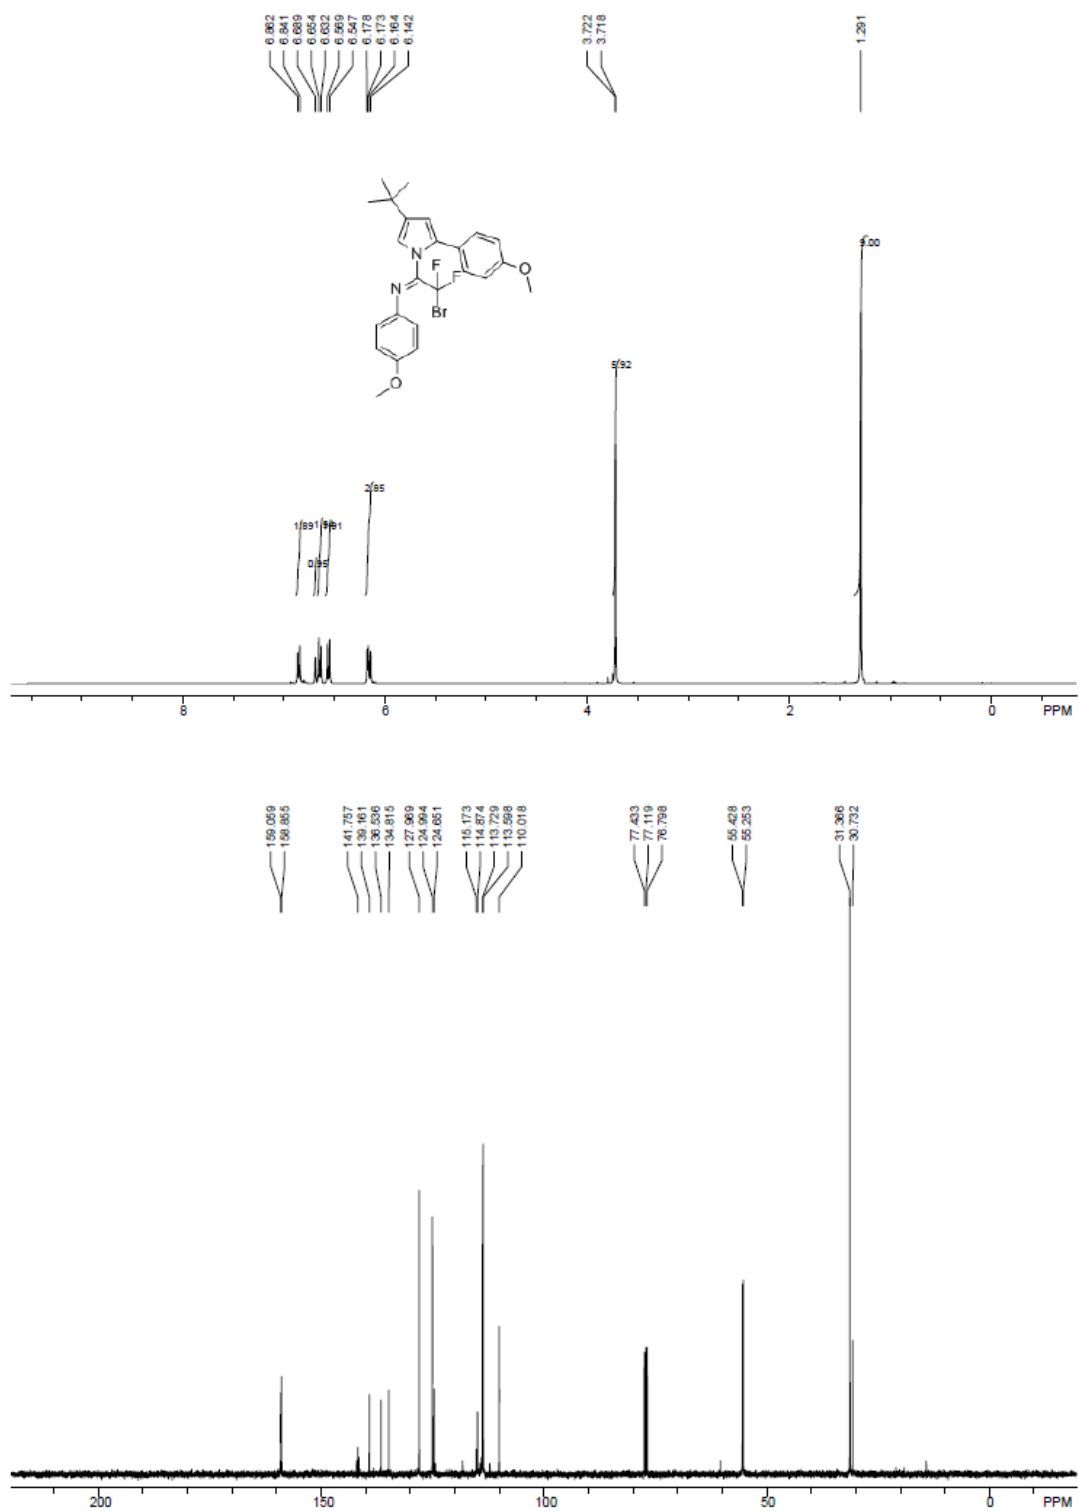

2a

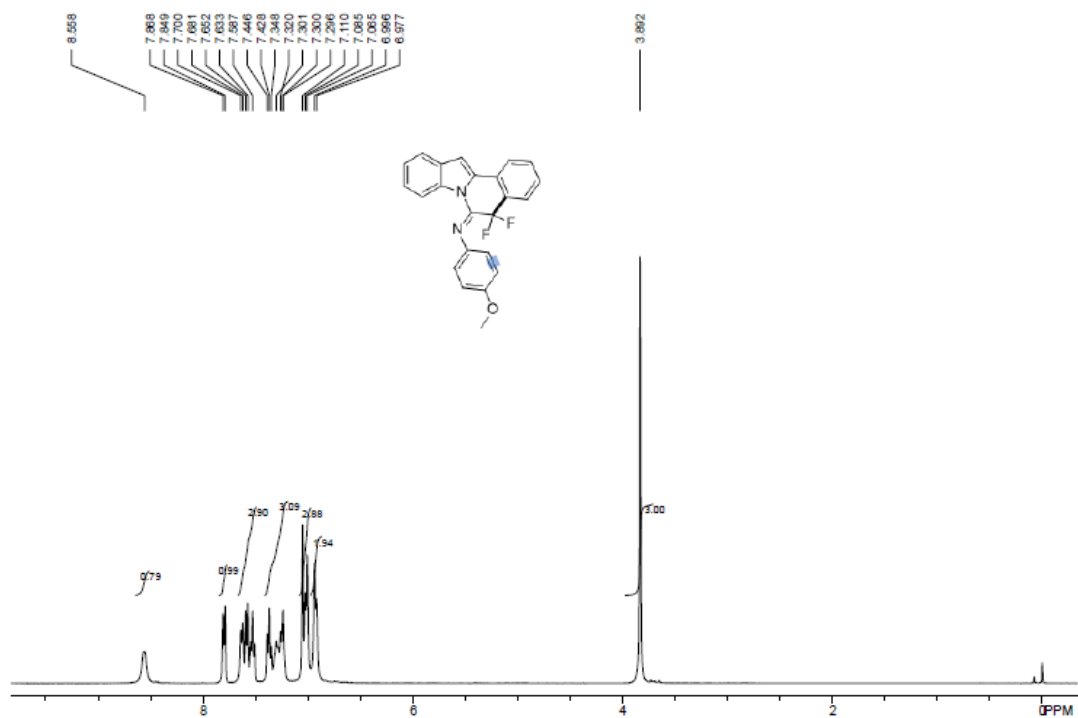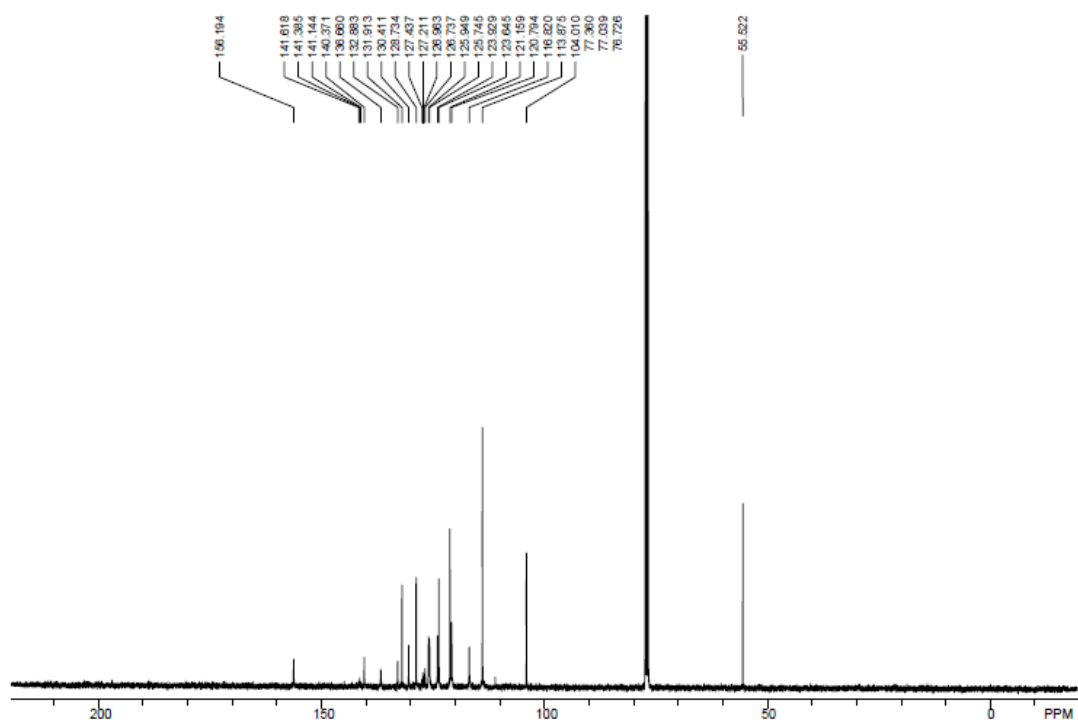



2b

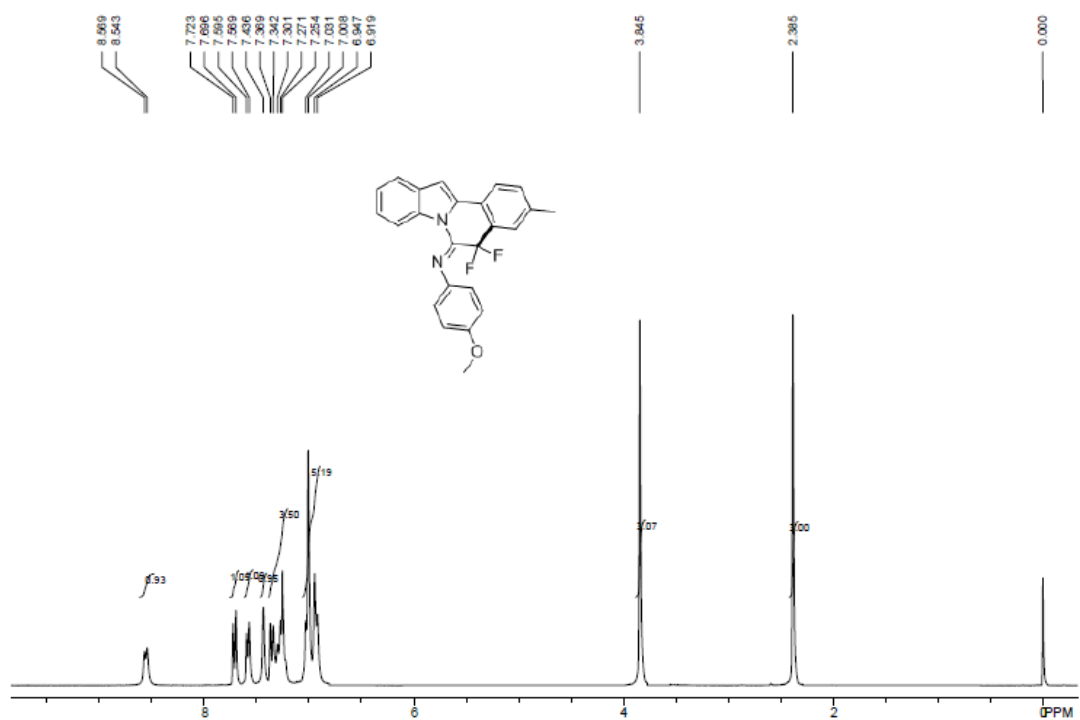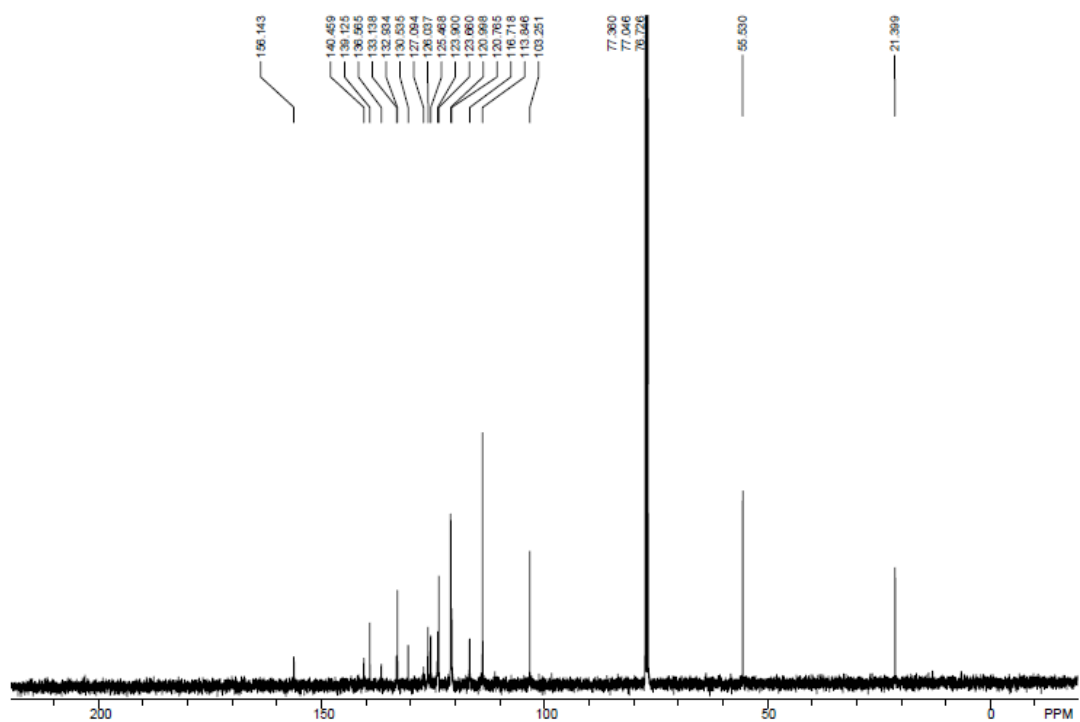

2c

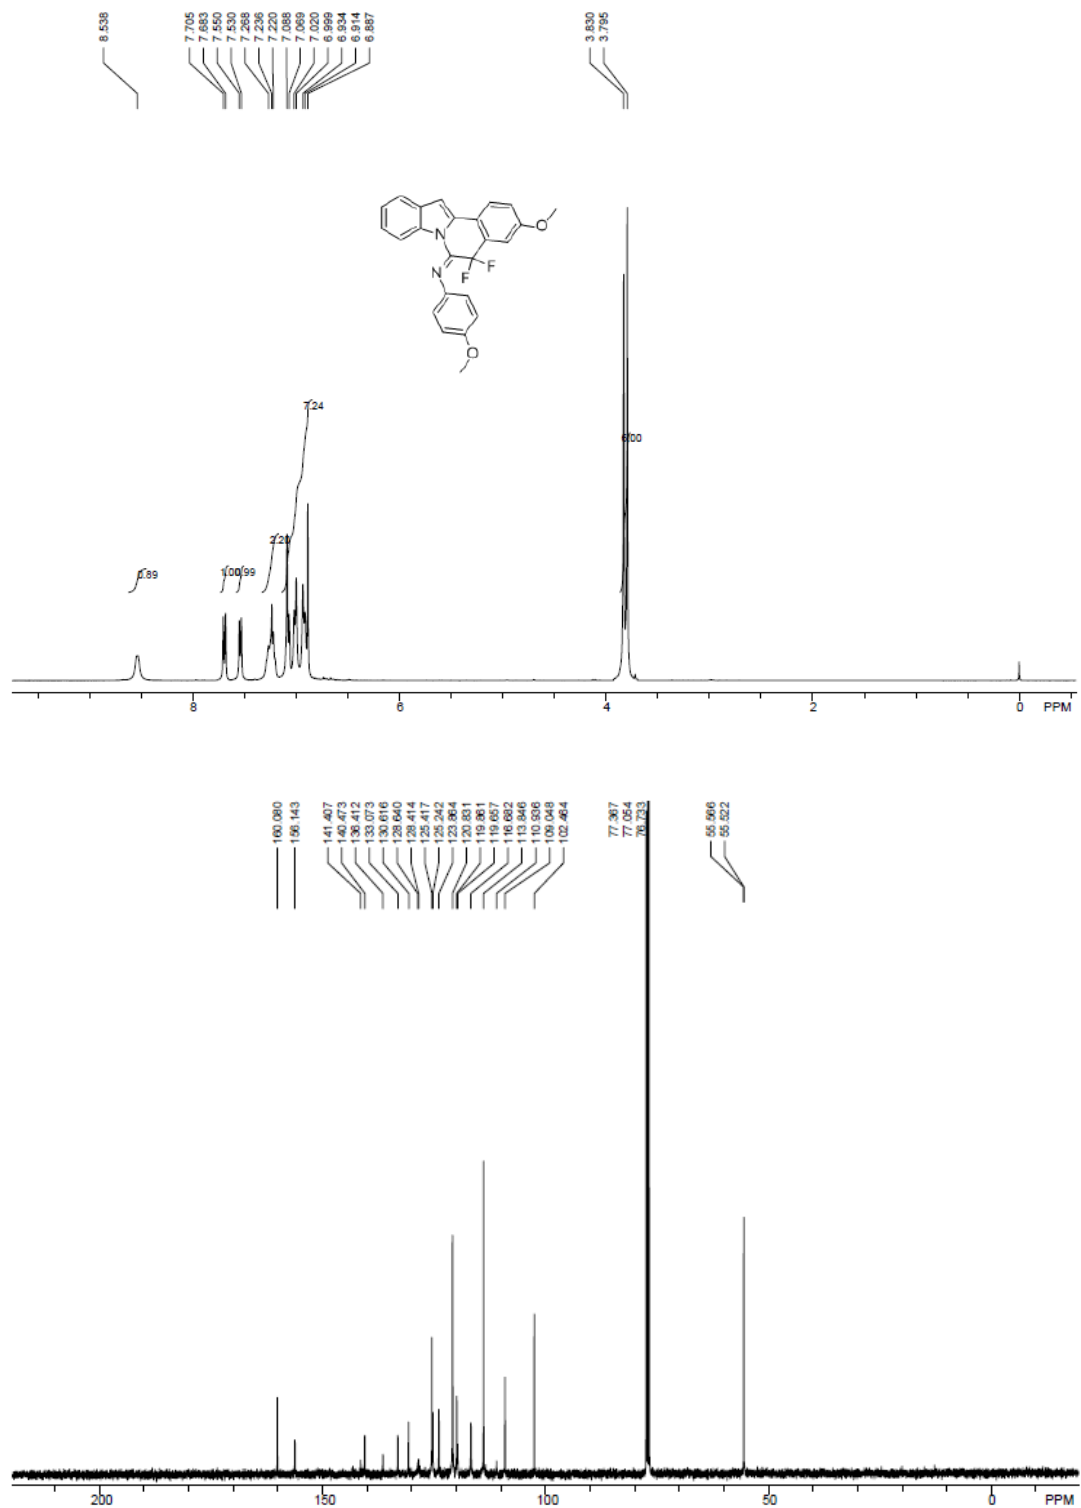

2d

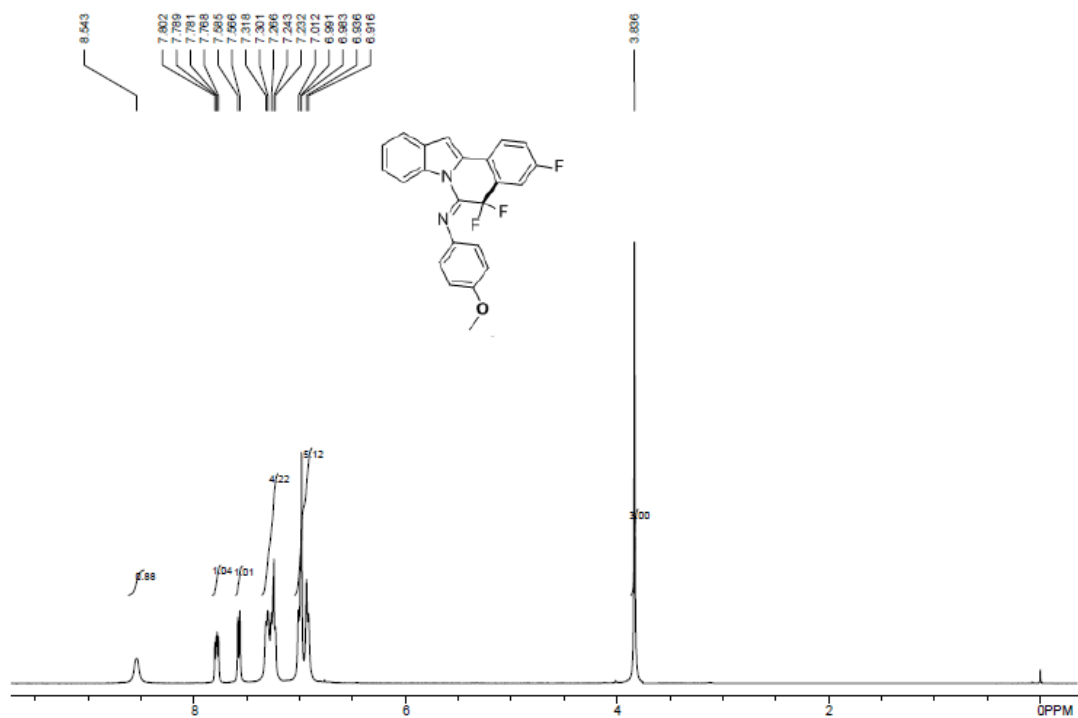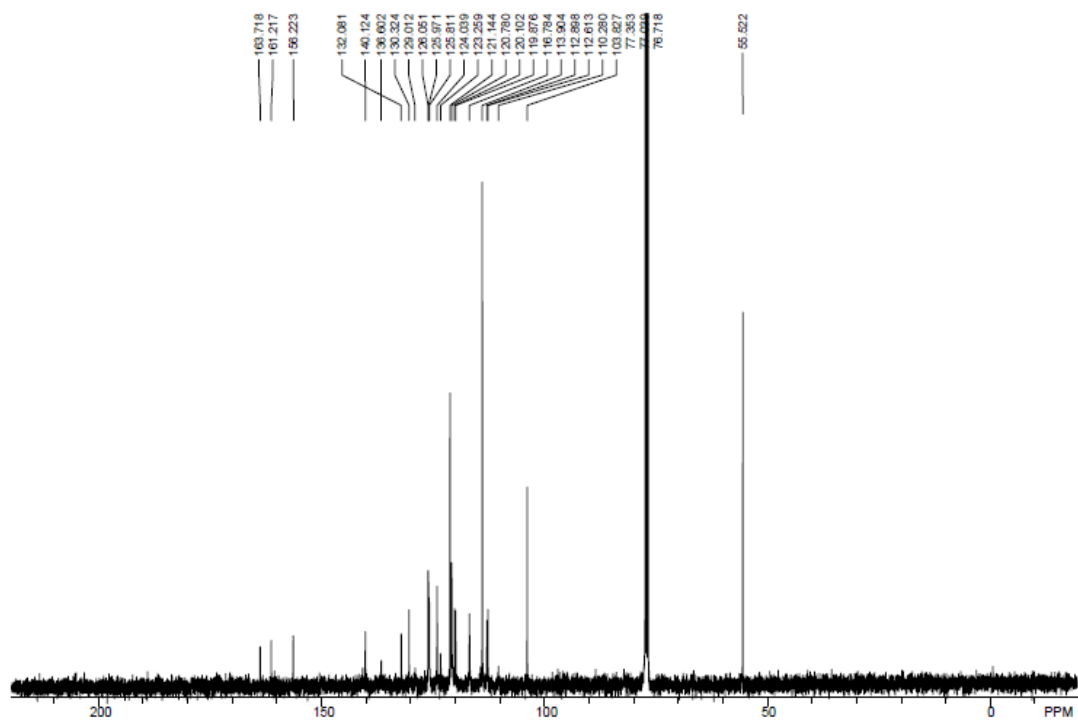

2e

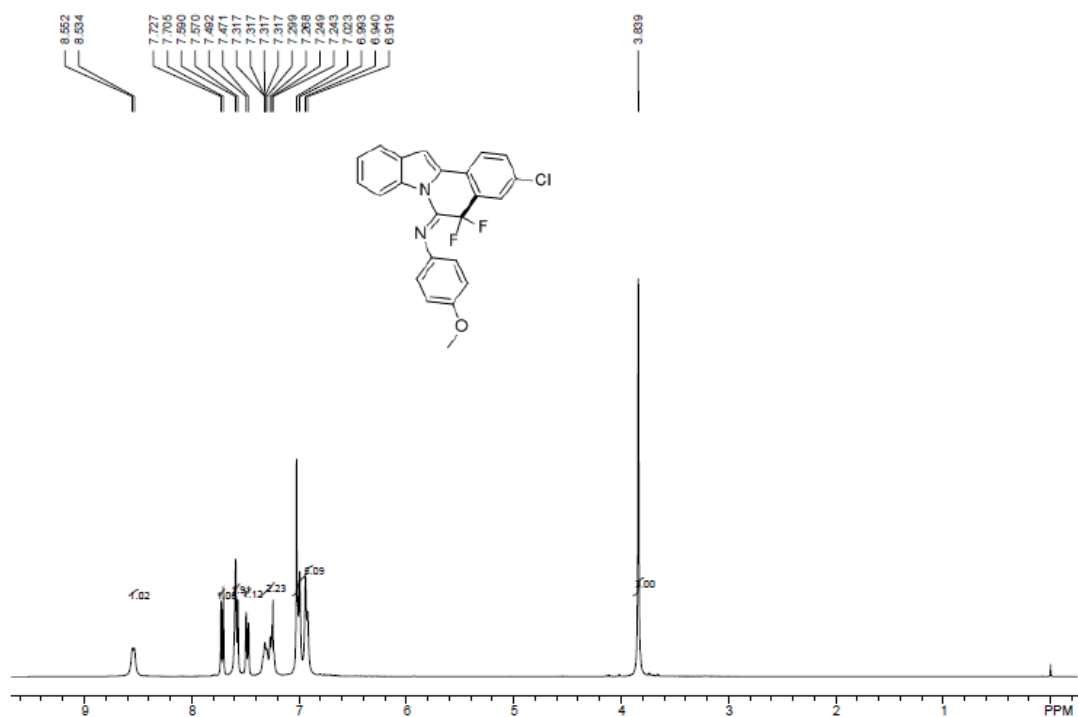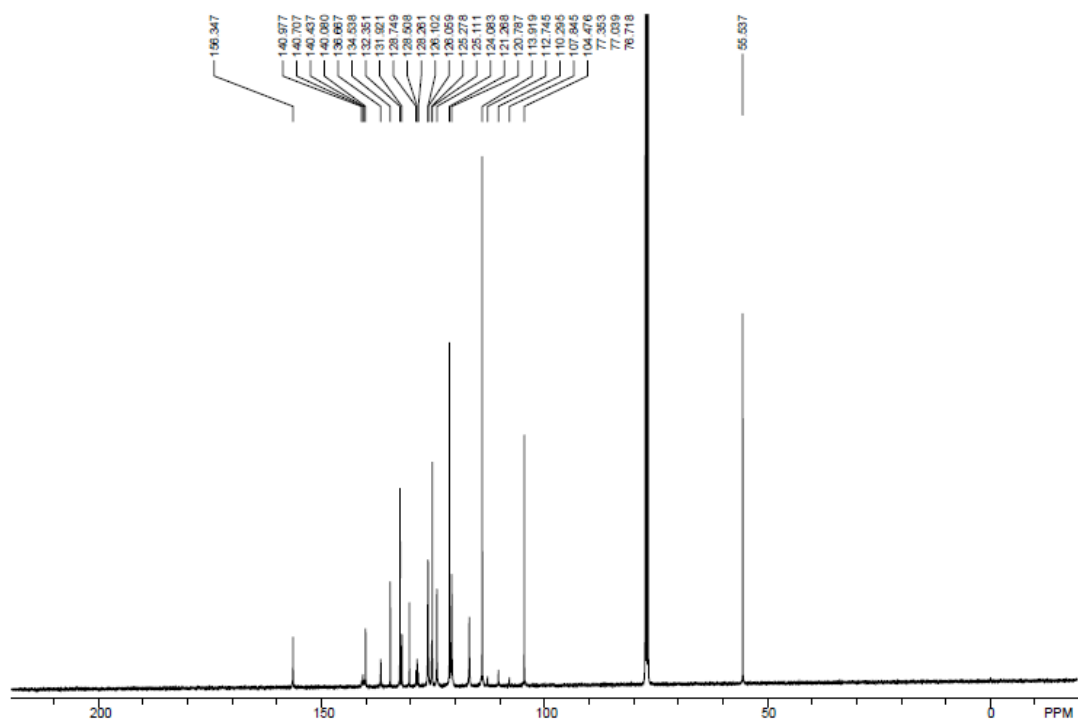

2f

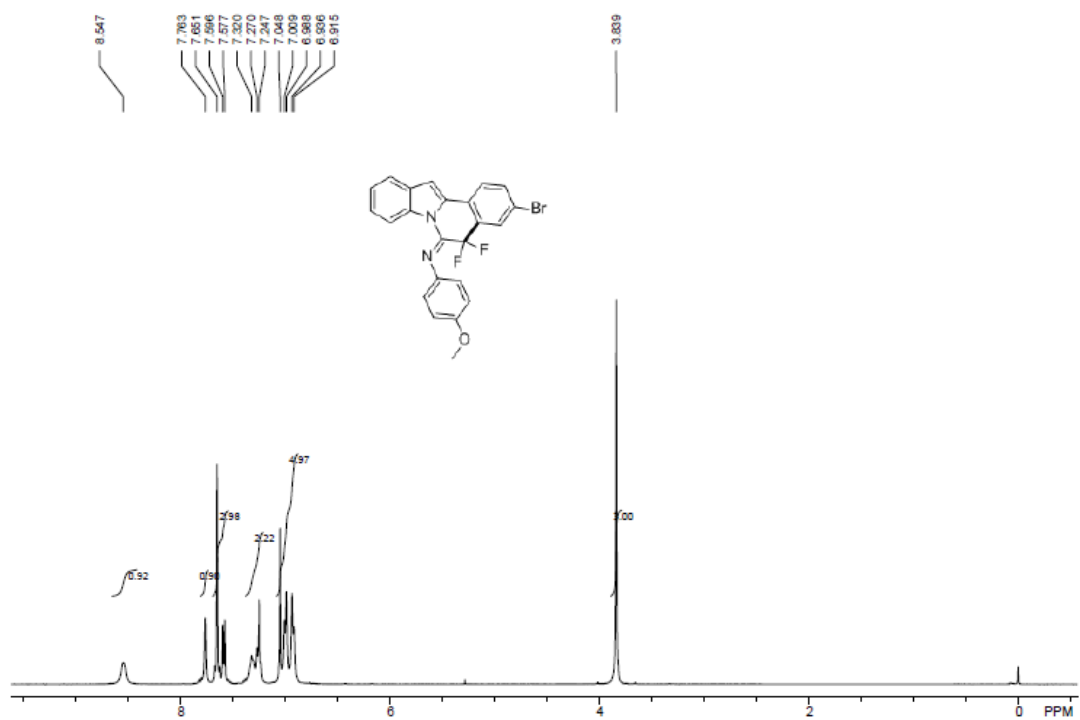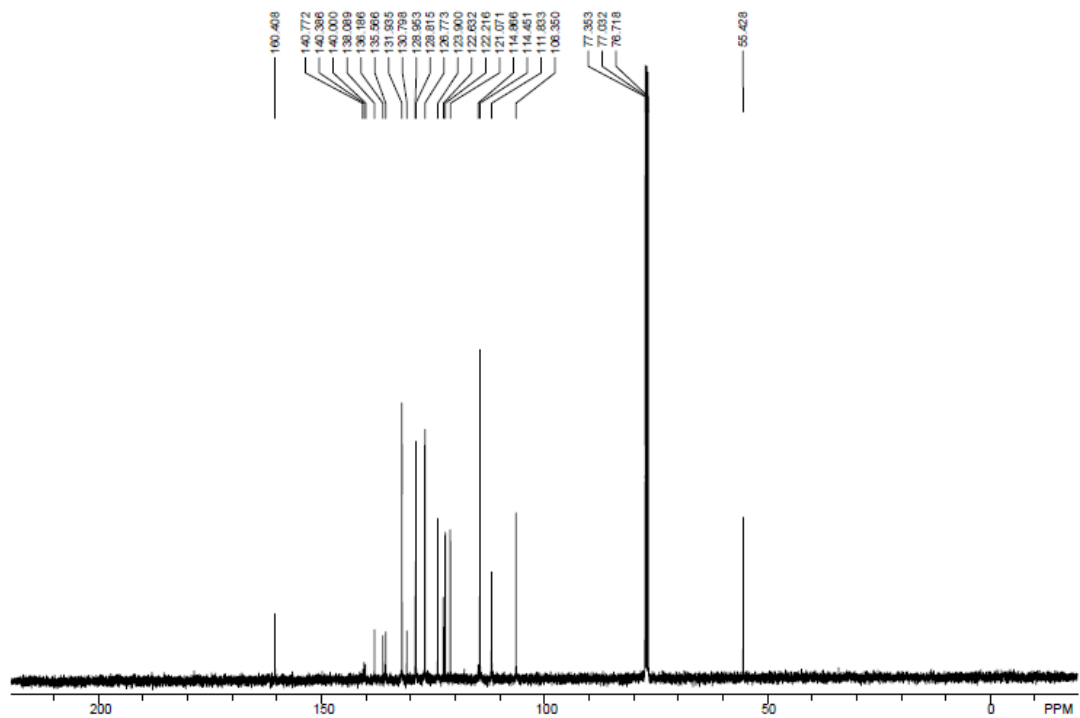

2g

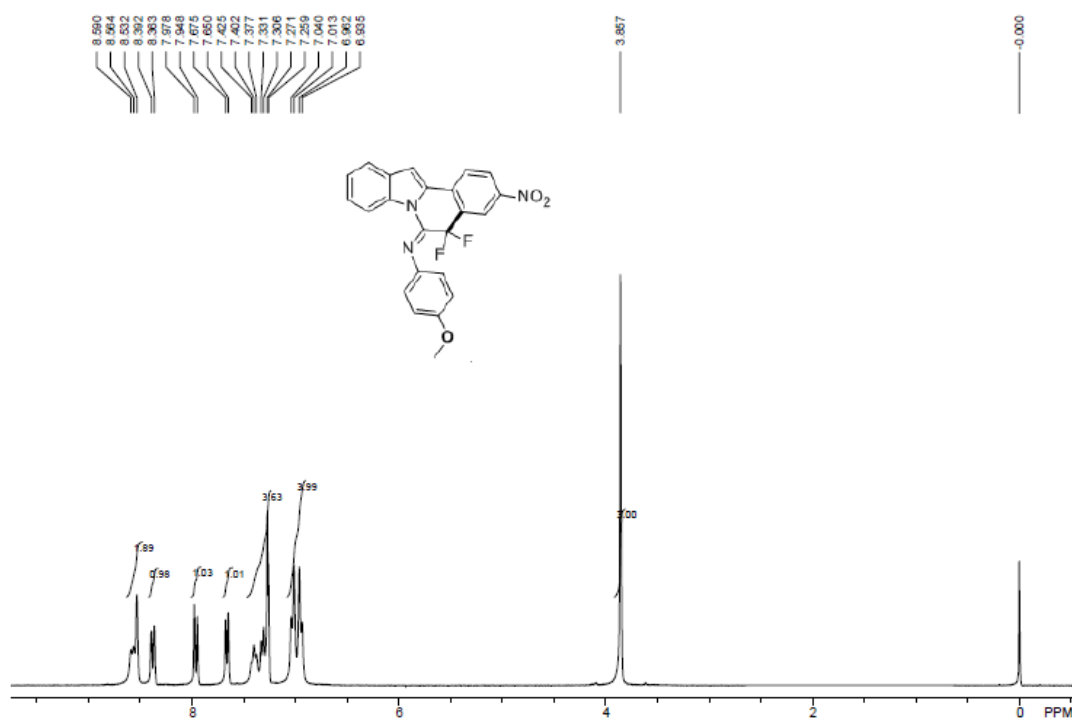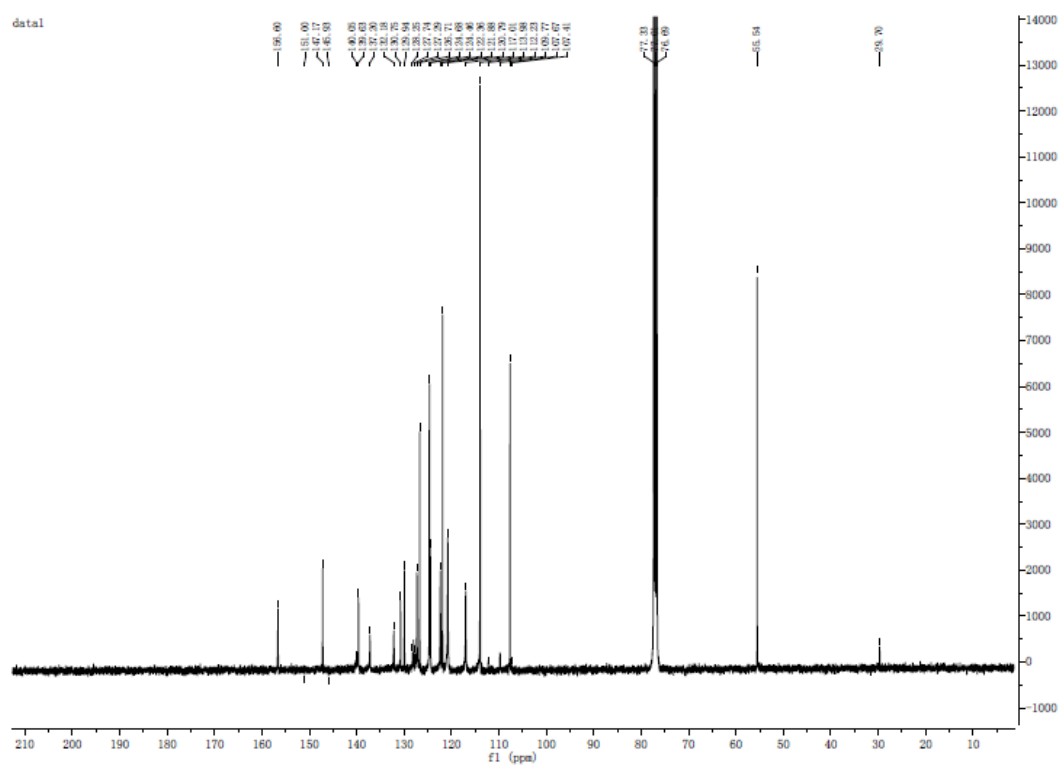

2h

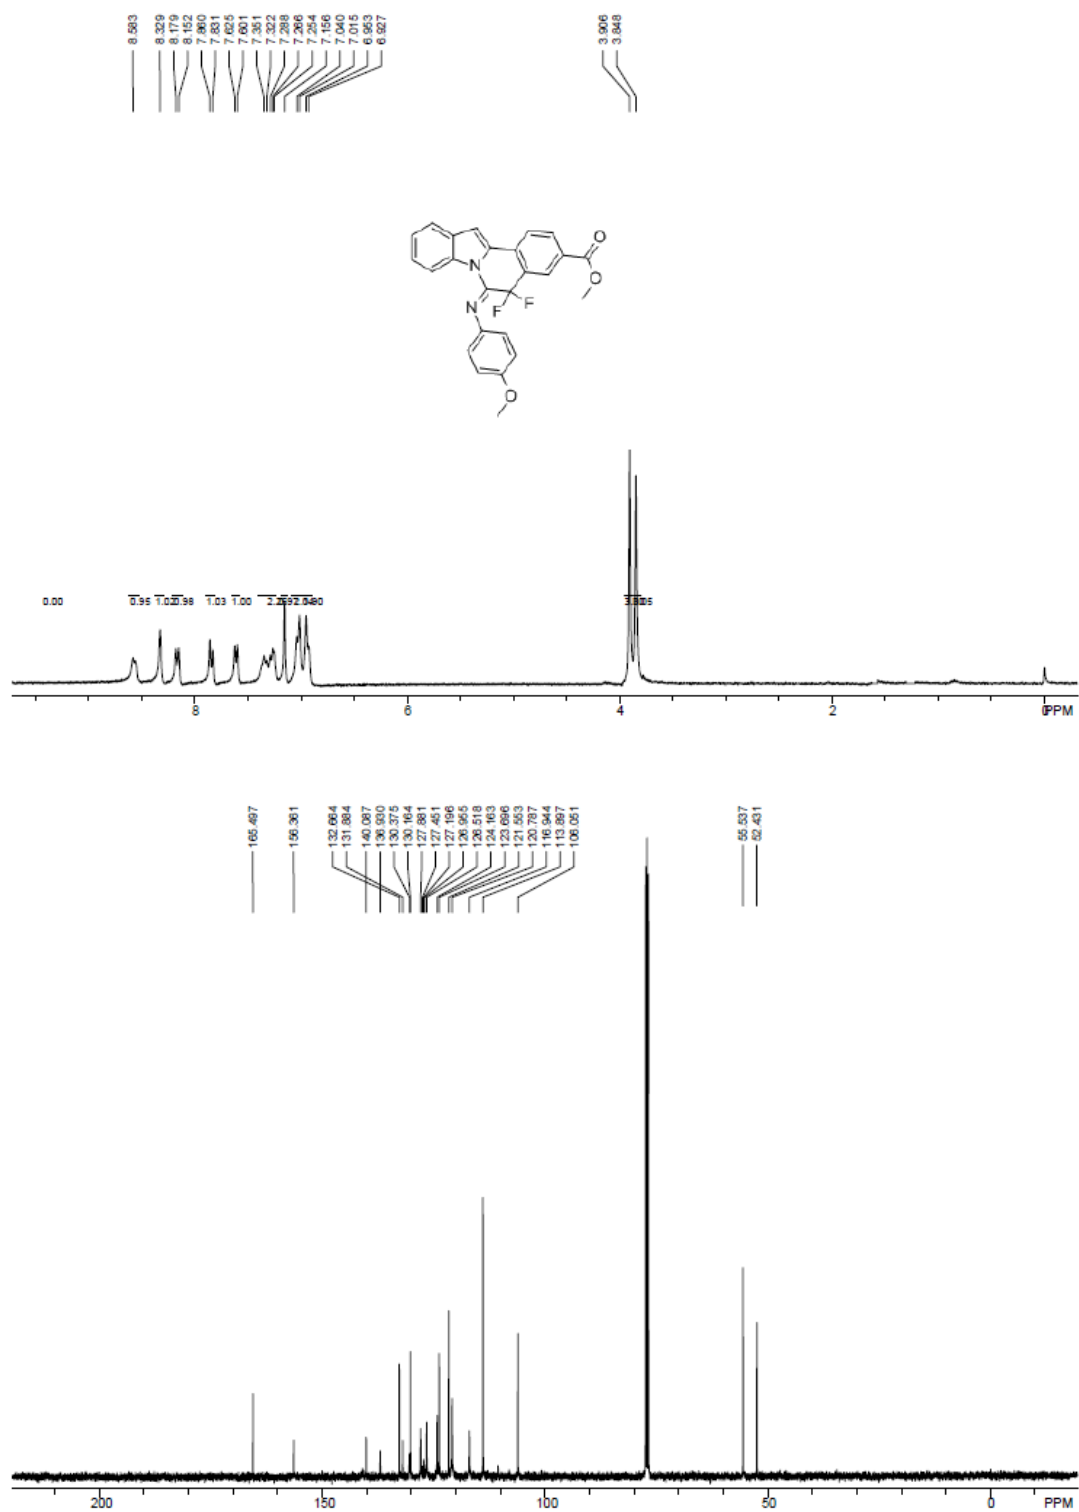

2i

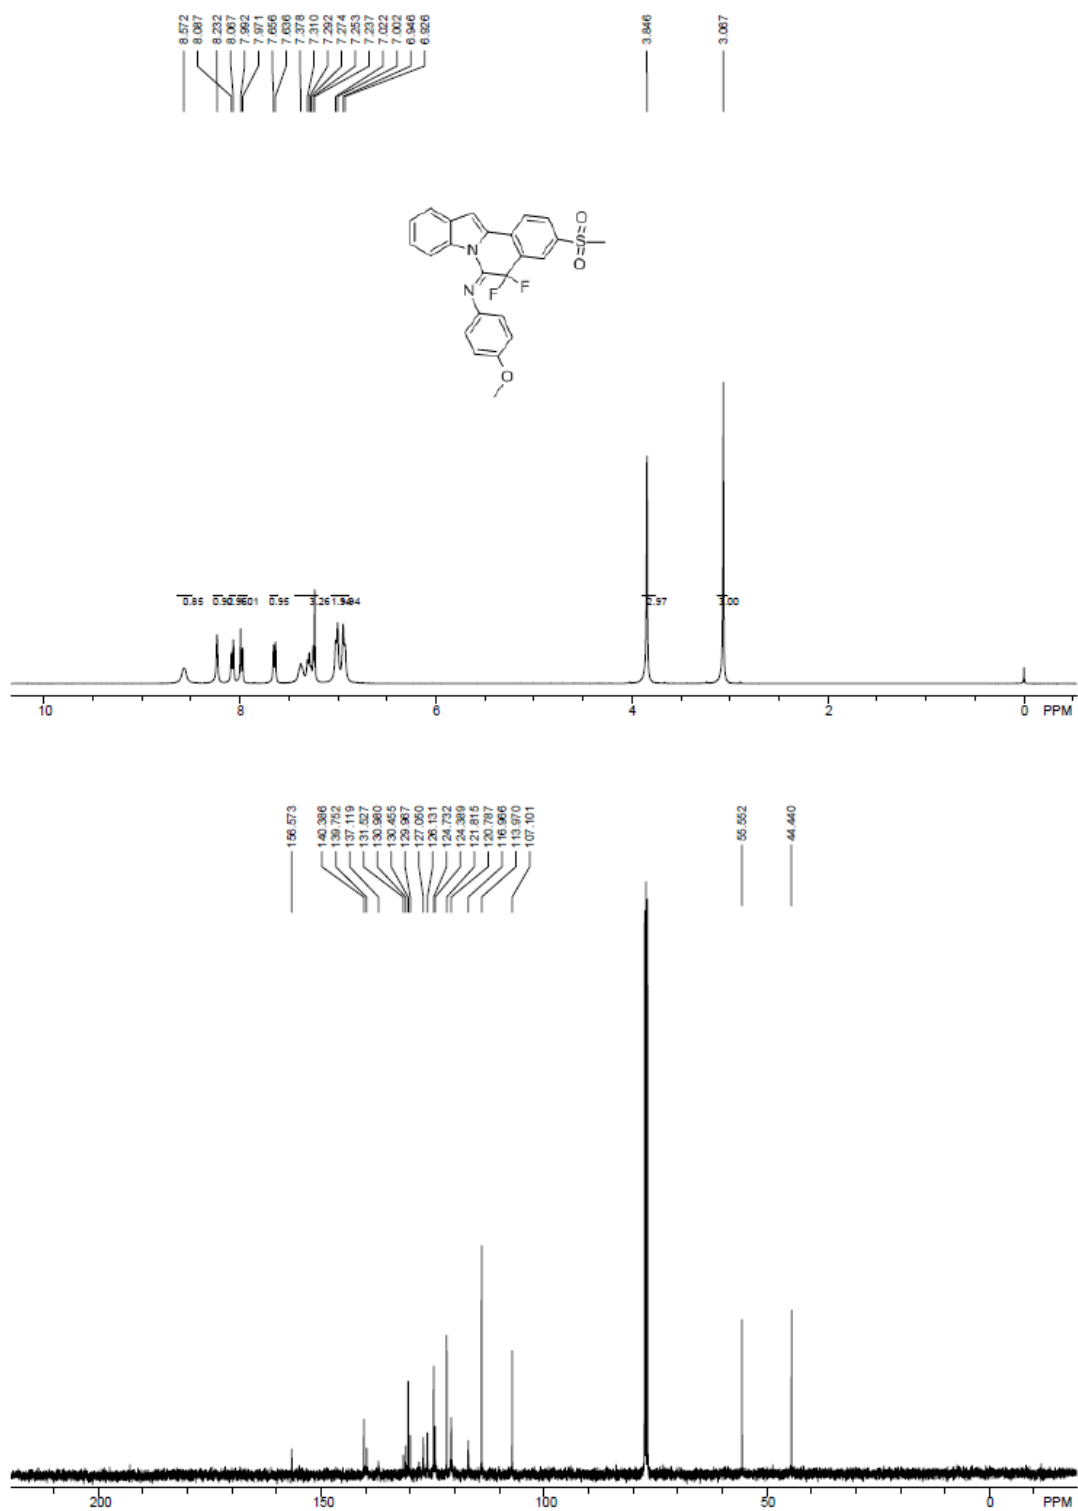



2j

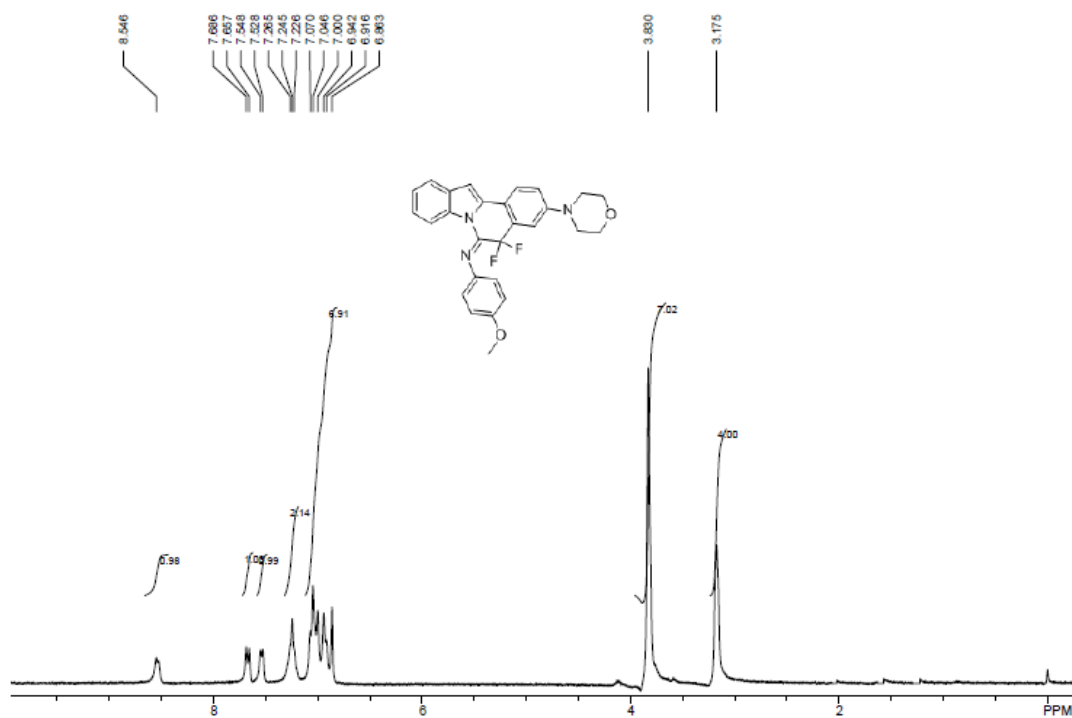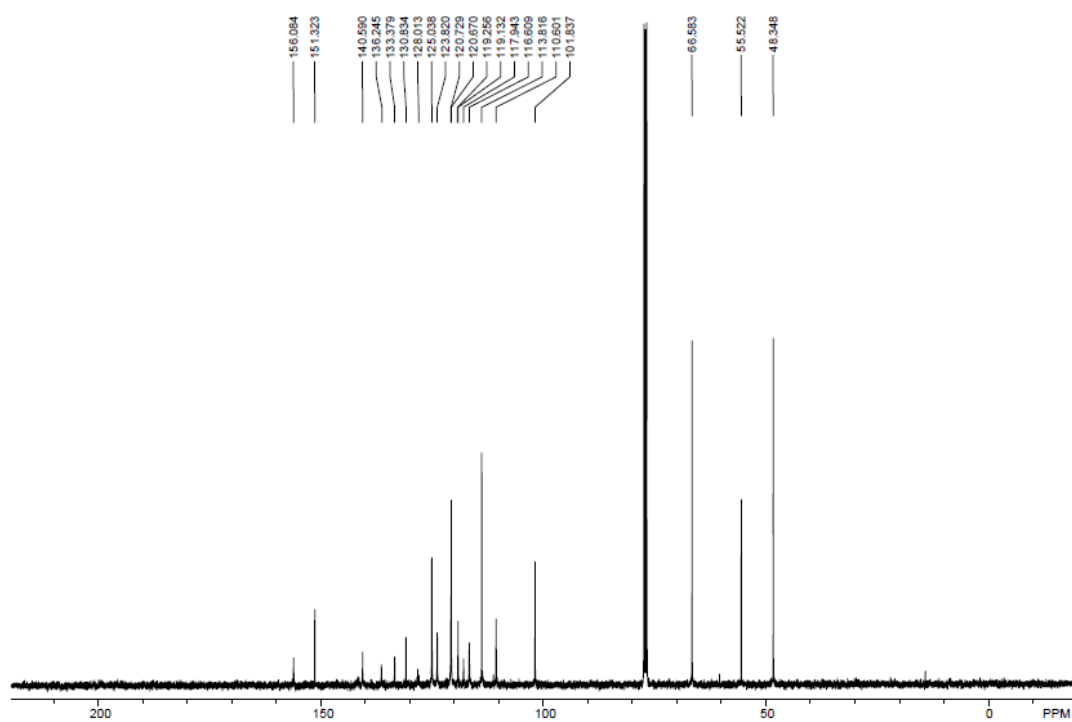

2k

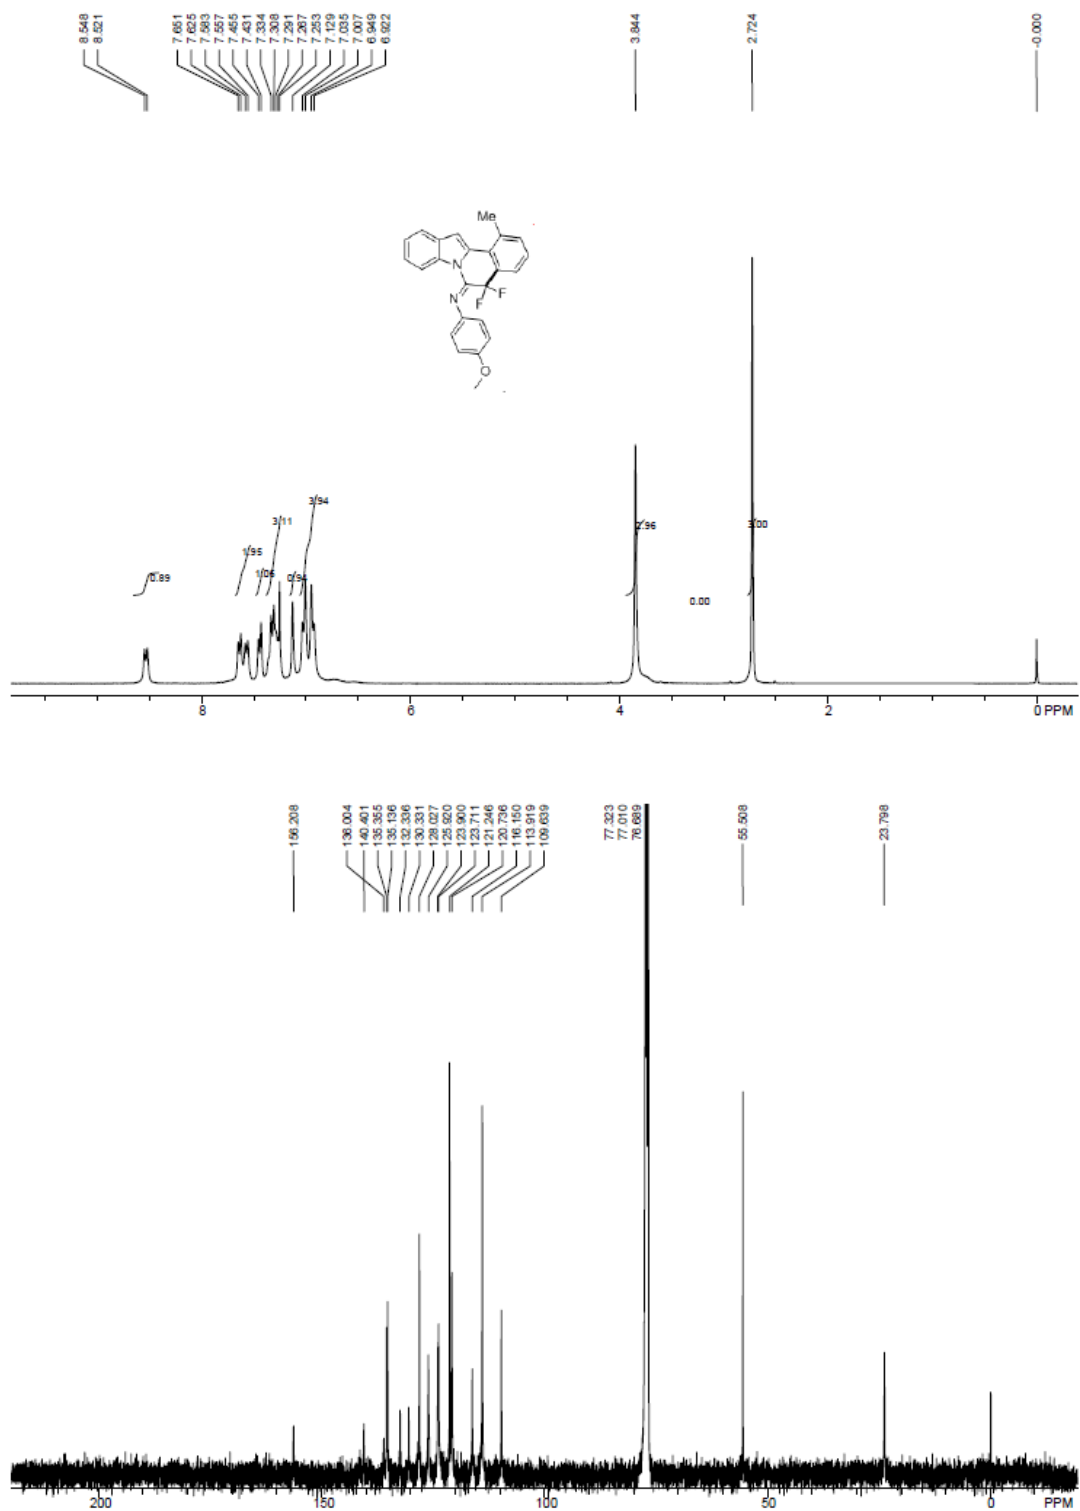

21 & 21'

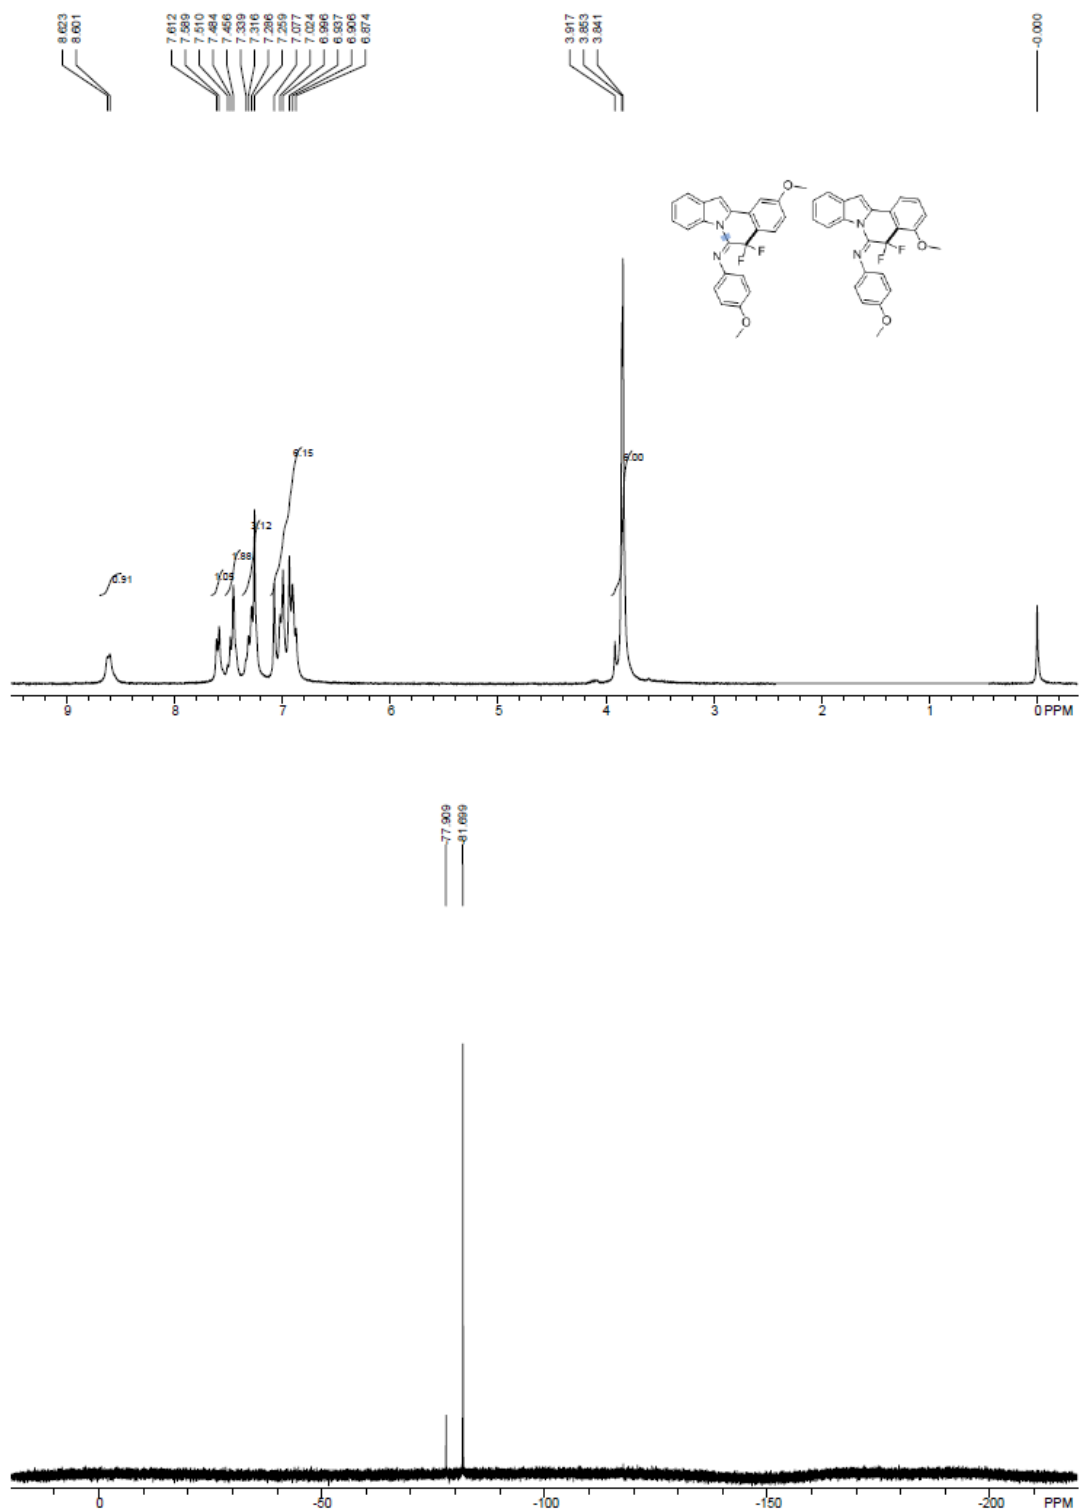

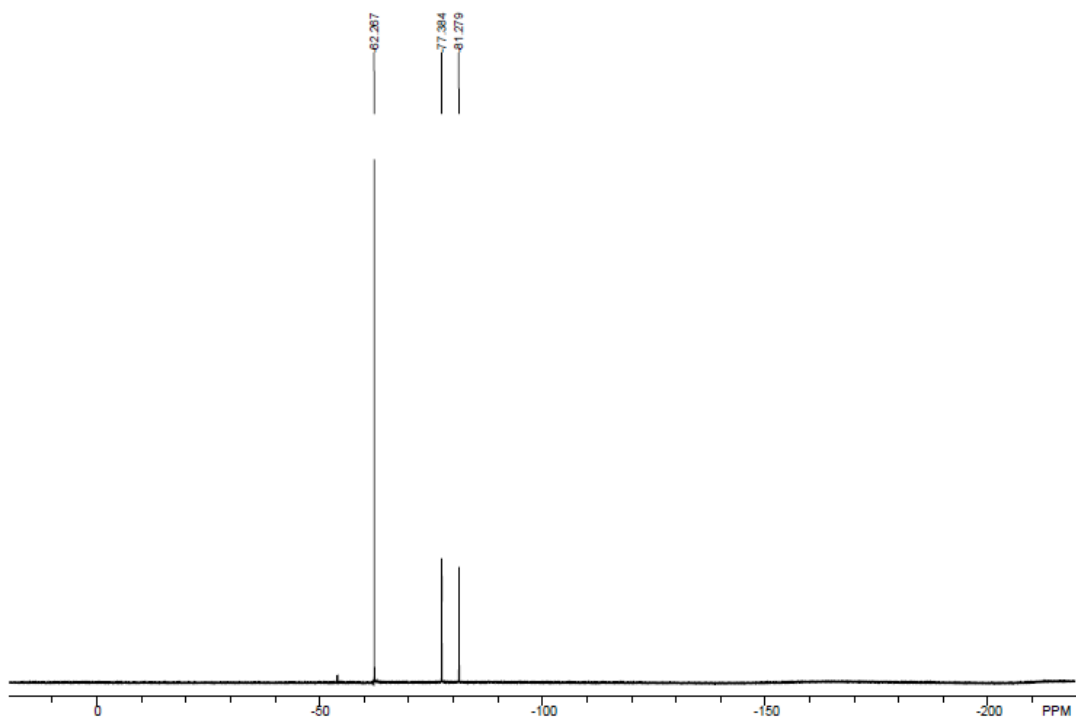

**2m & 2m'**

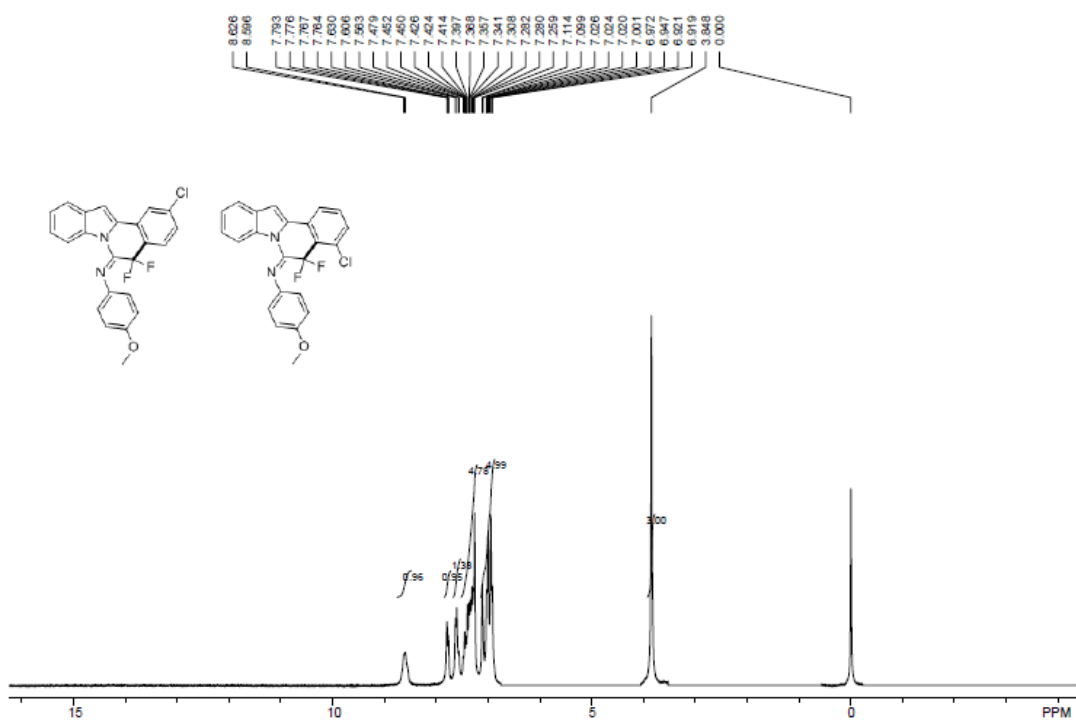

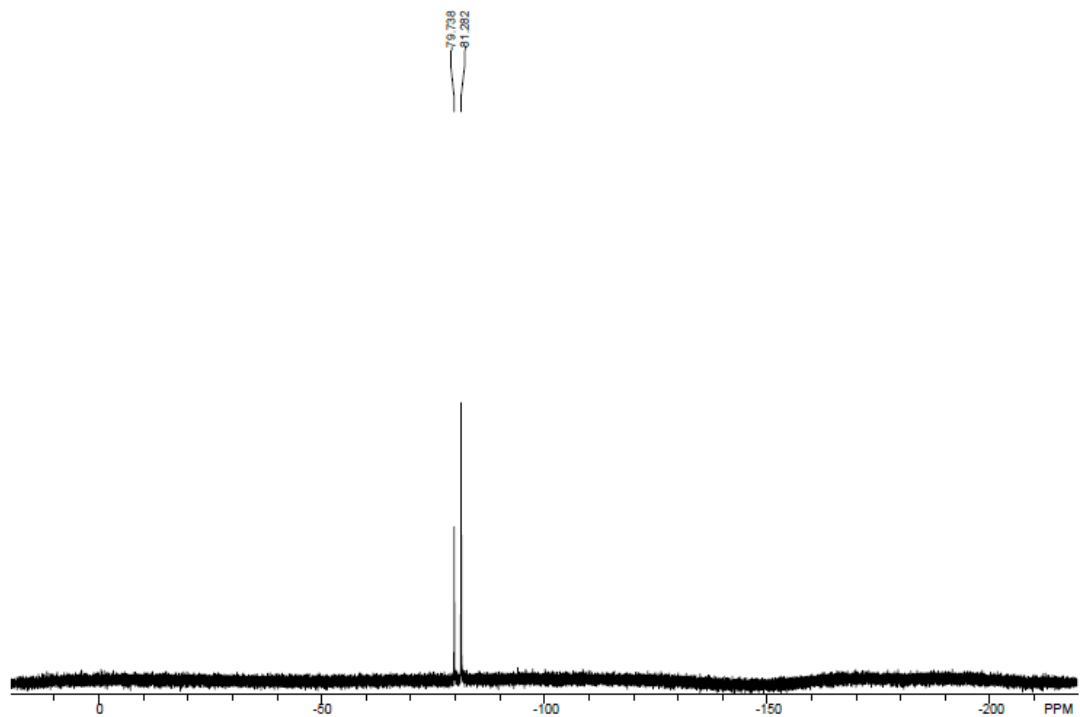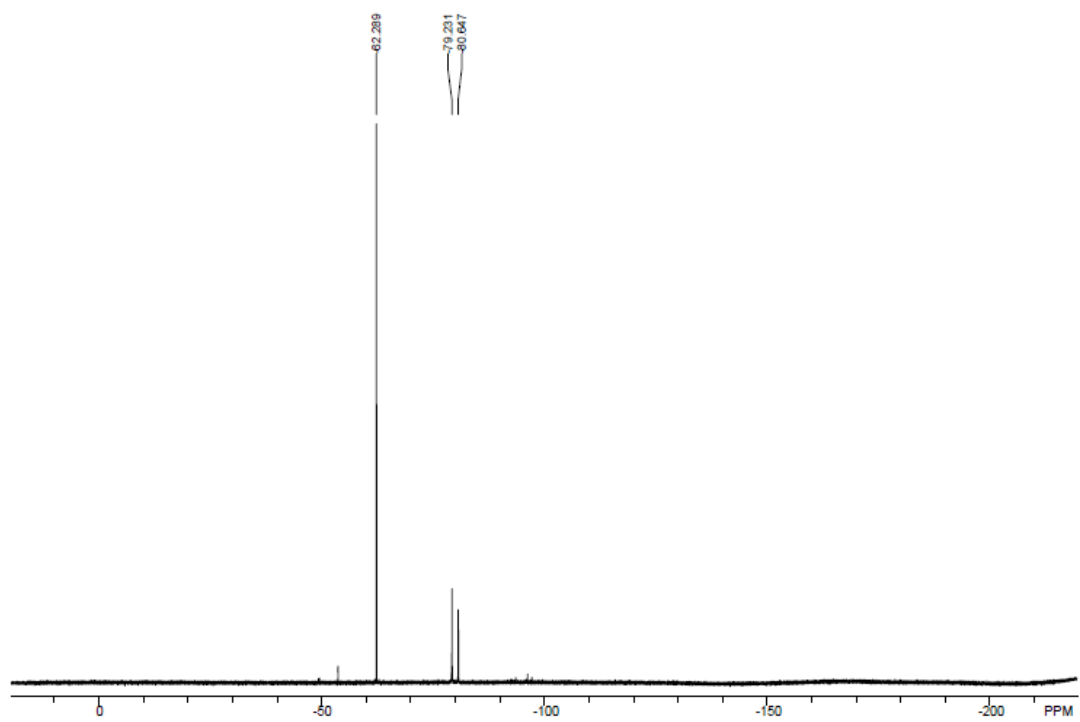

2n

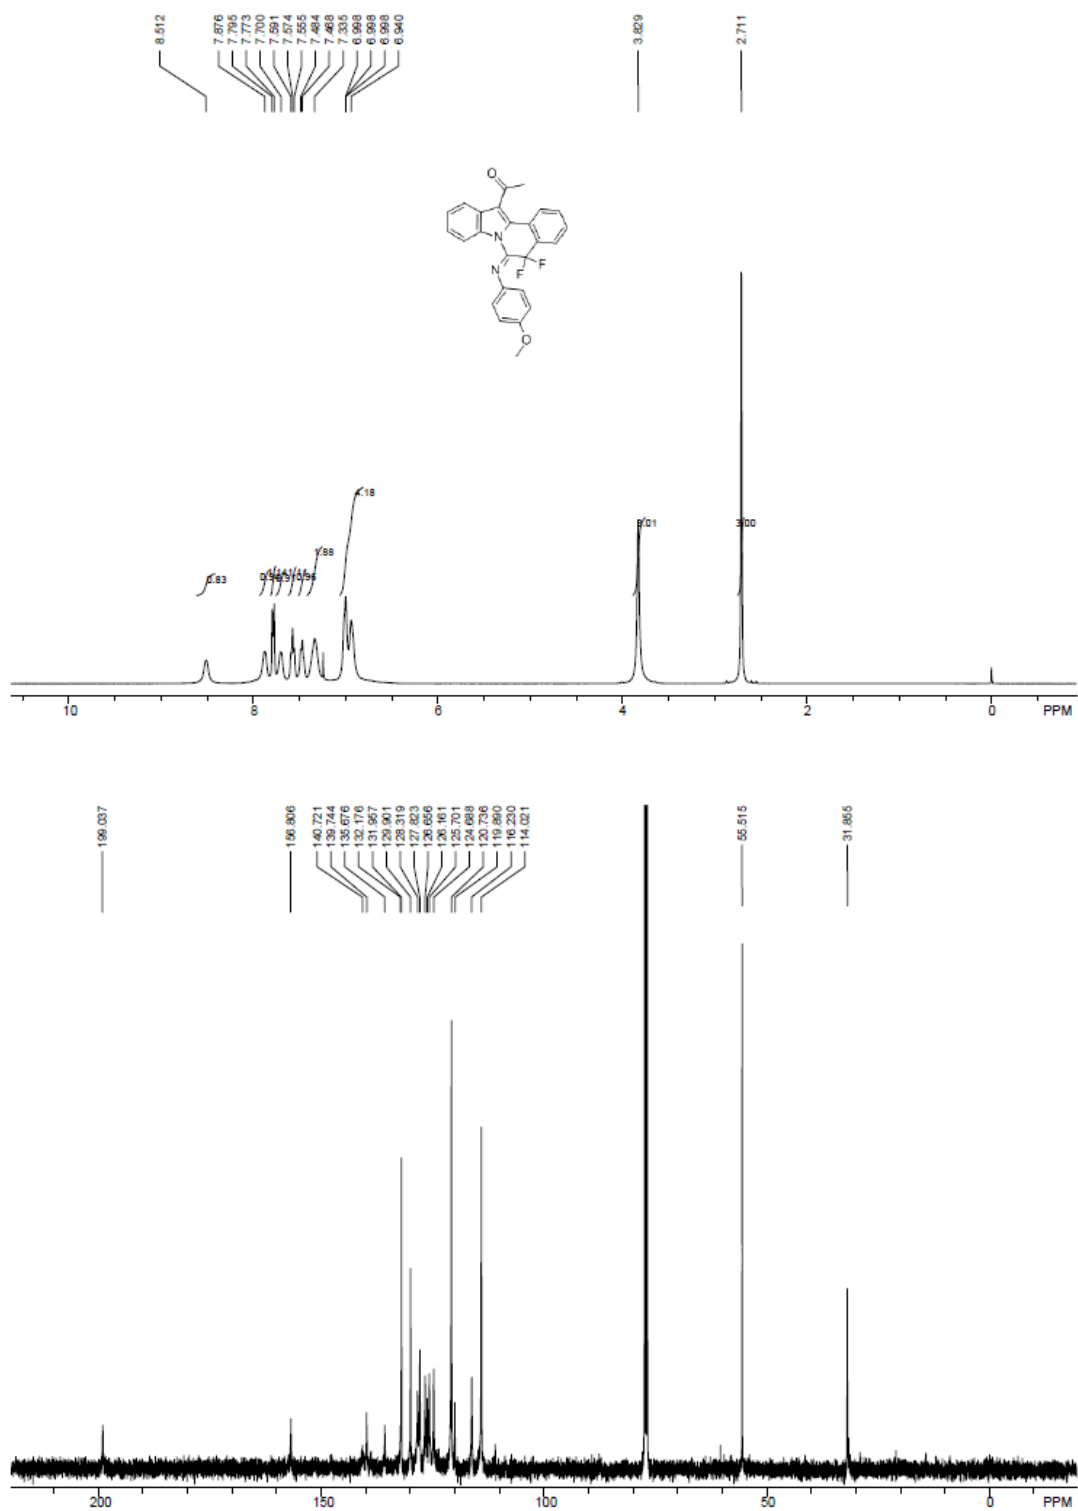

2o

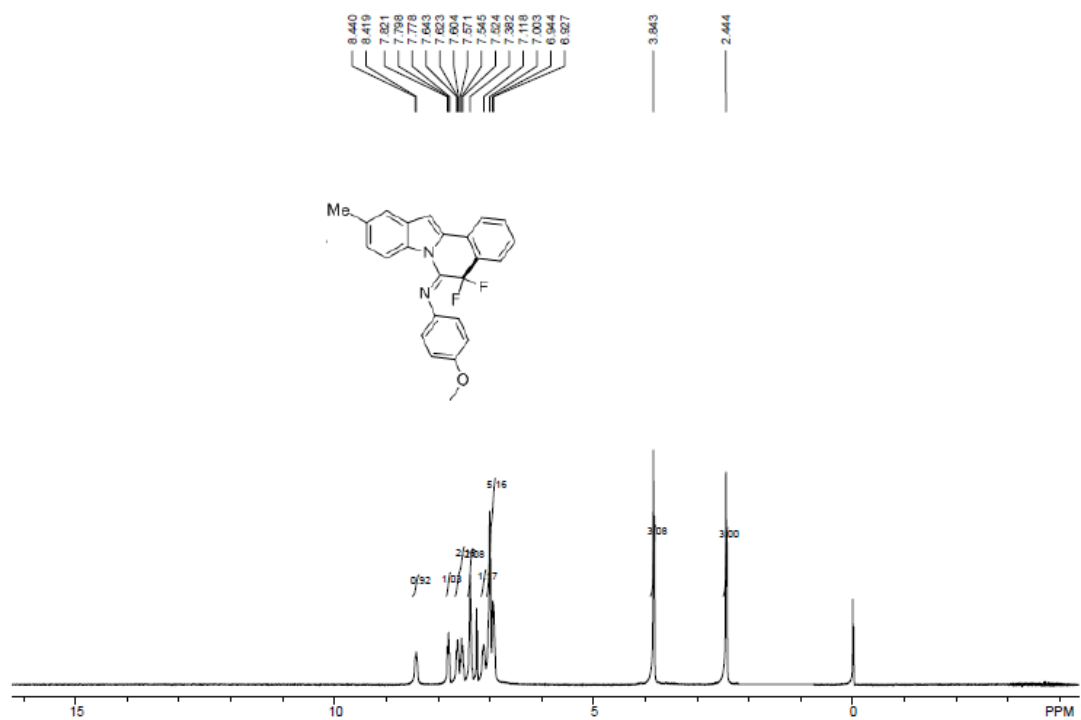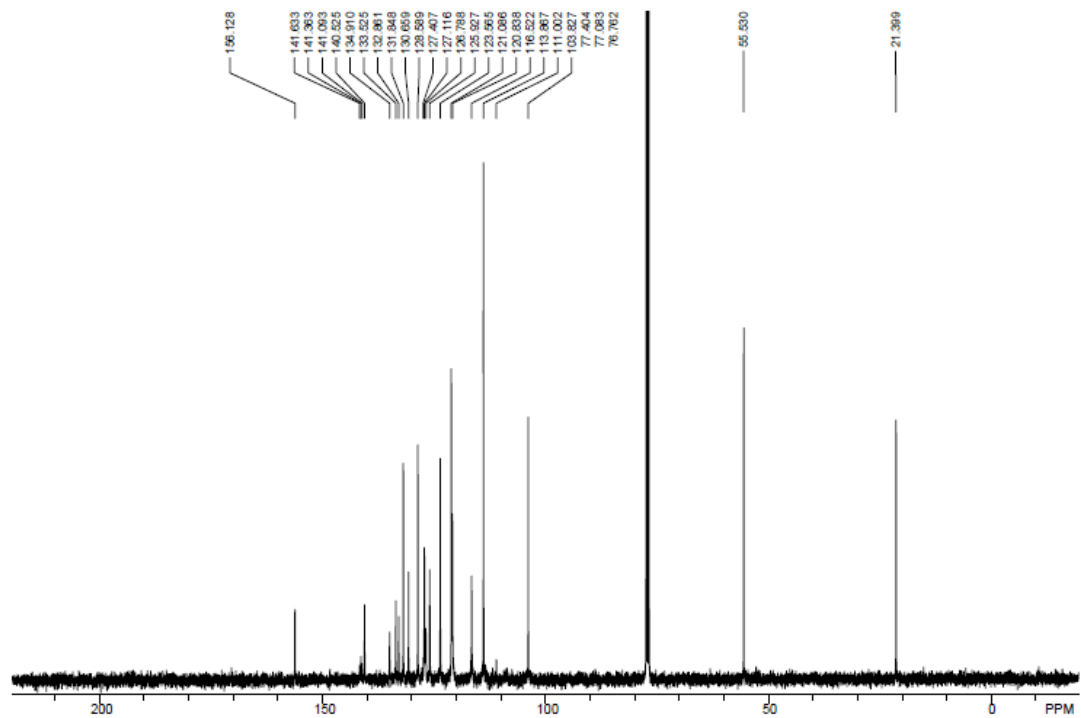

2p

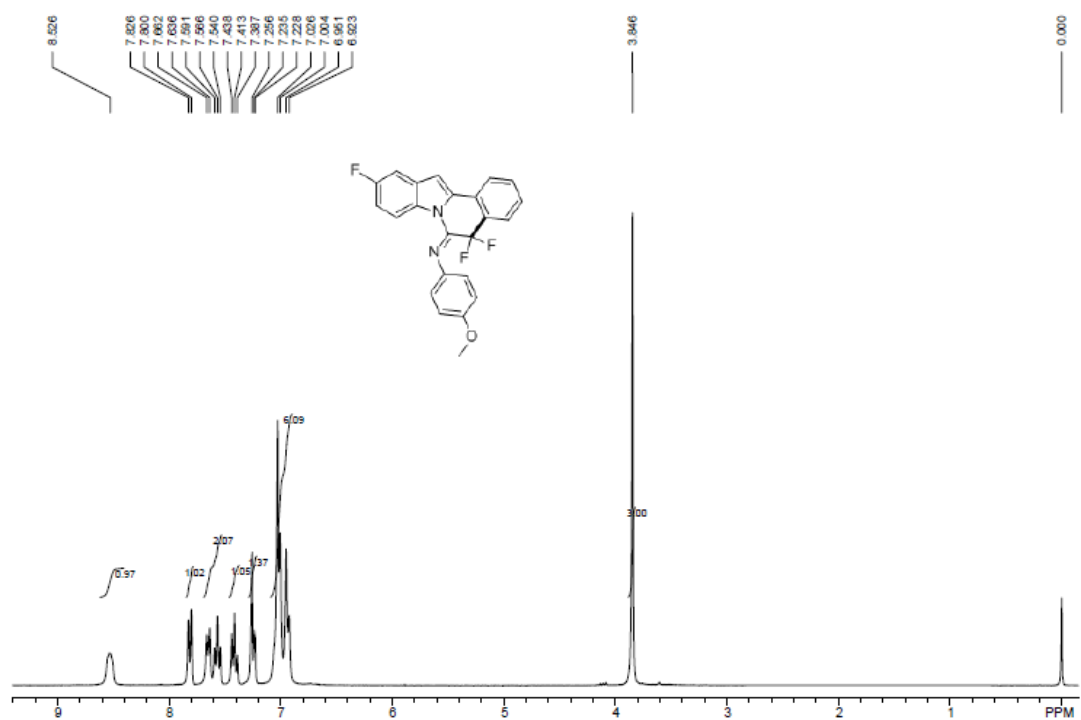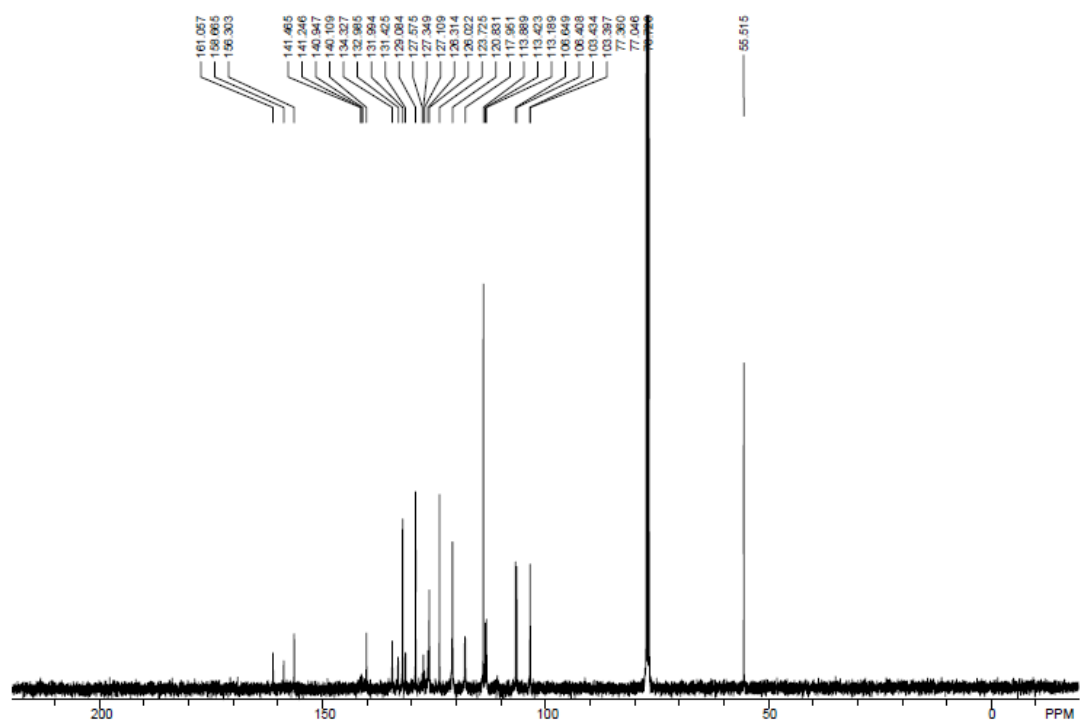



2q

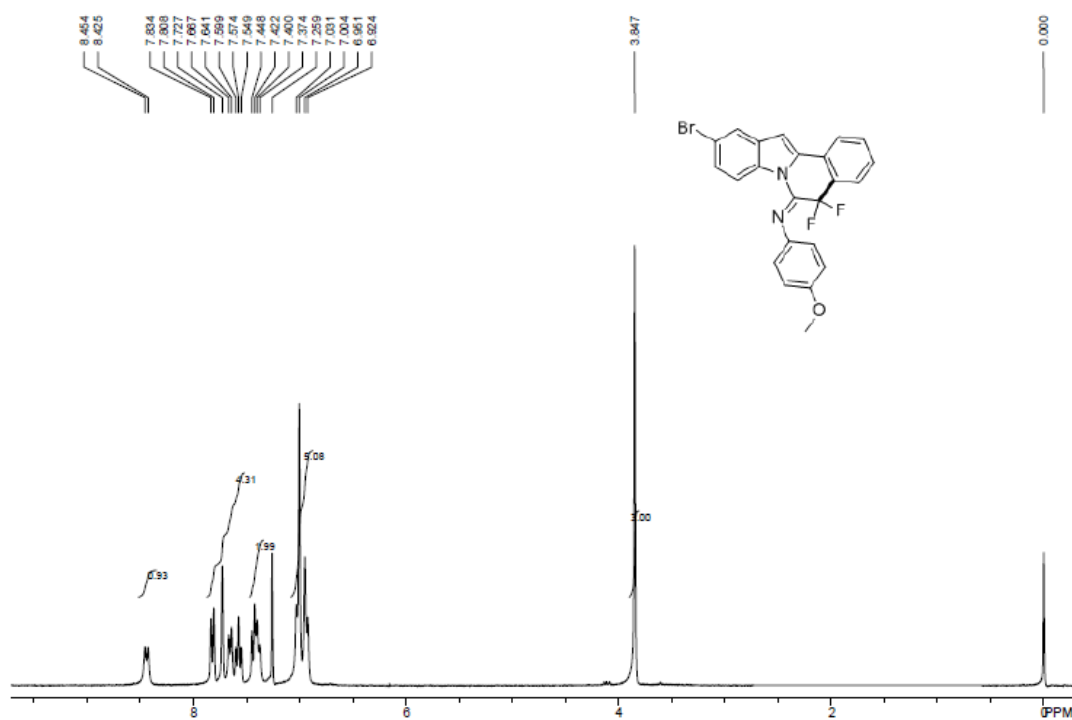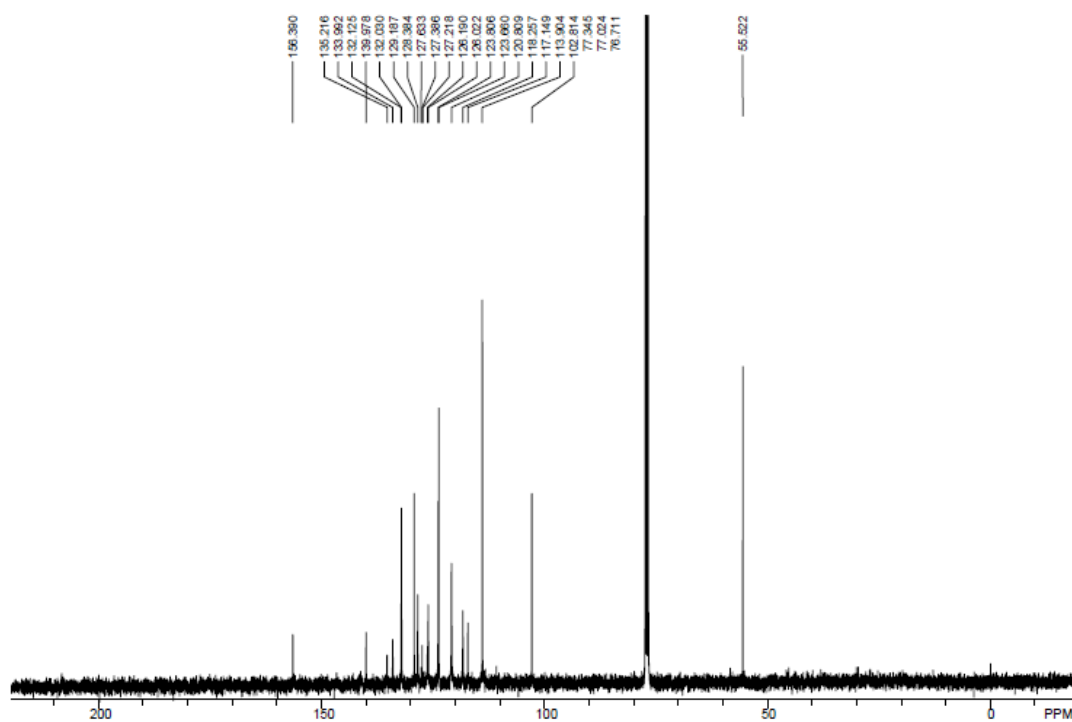

2r

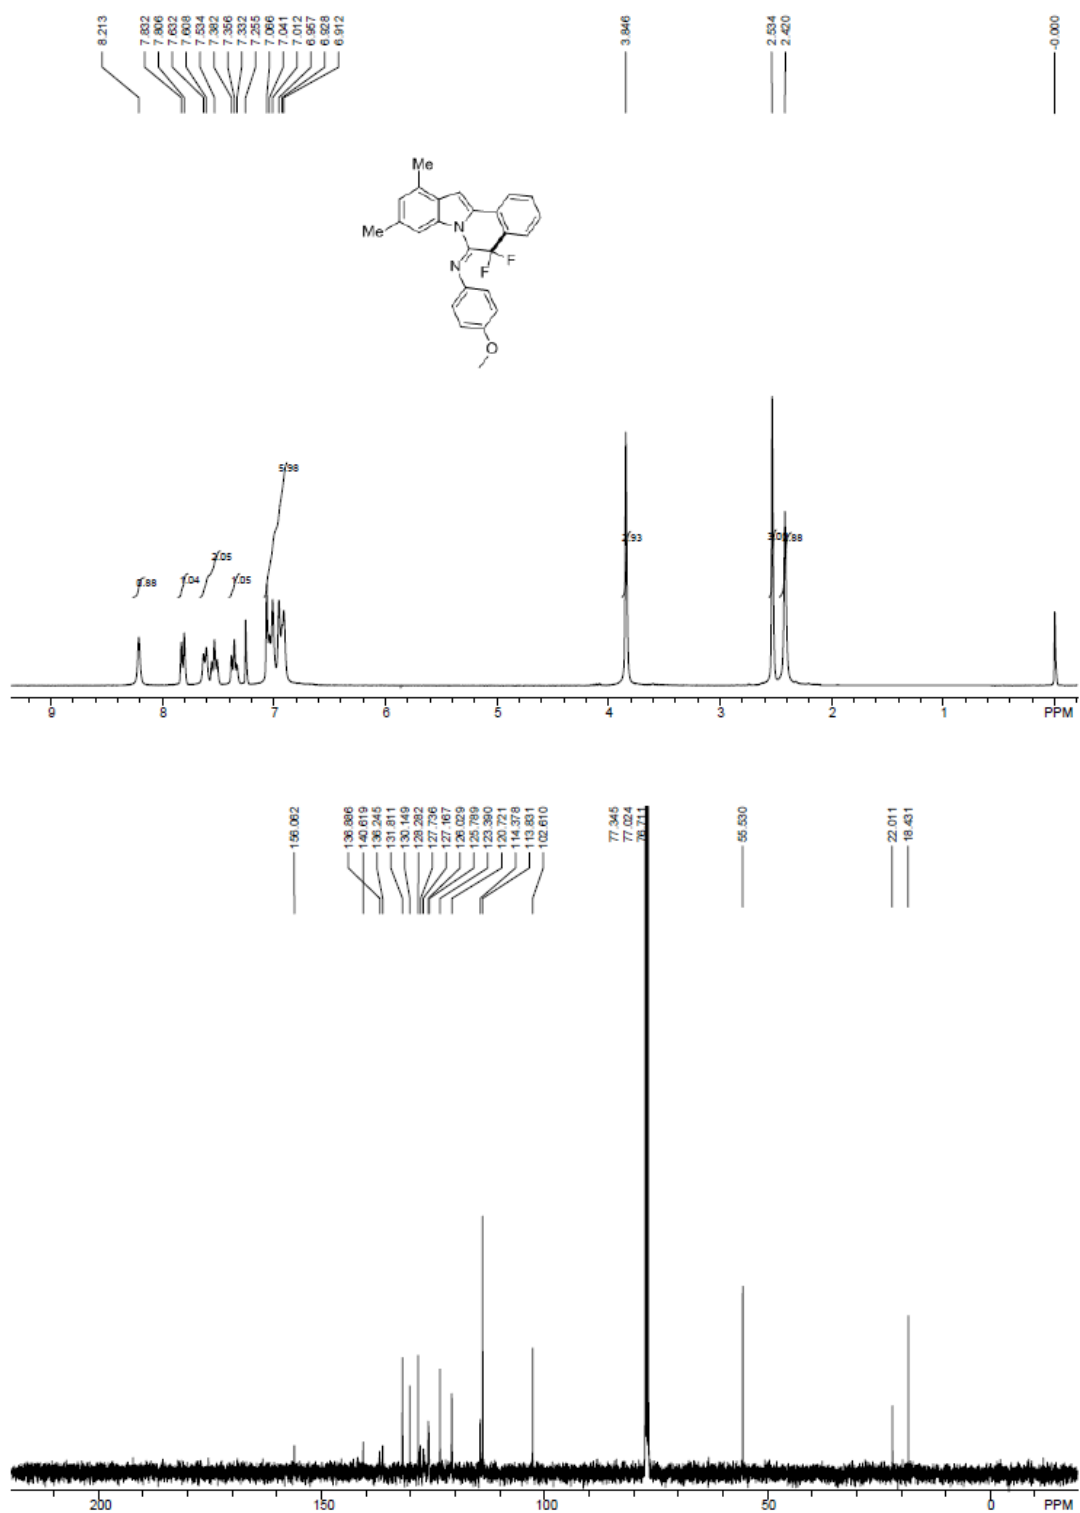

2s

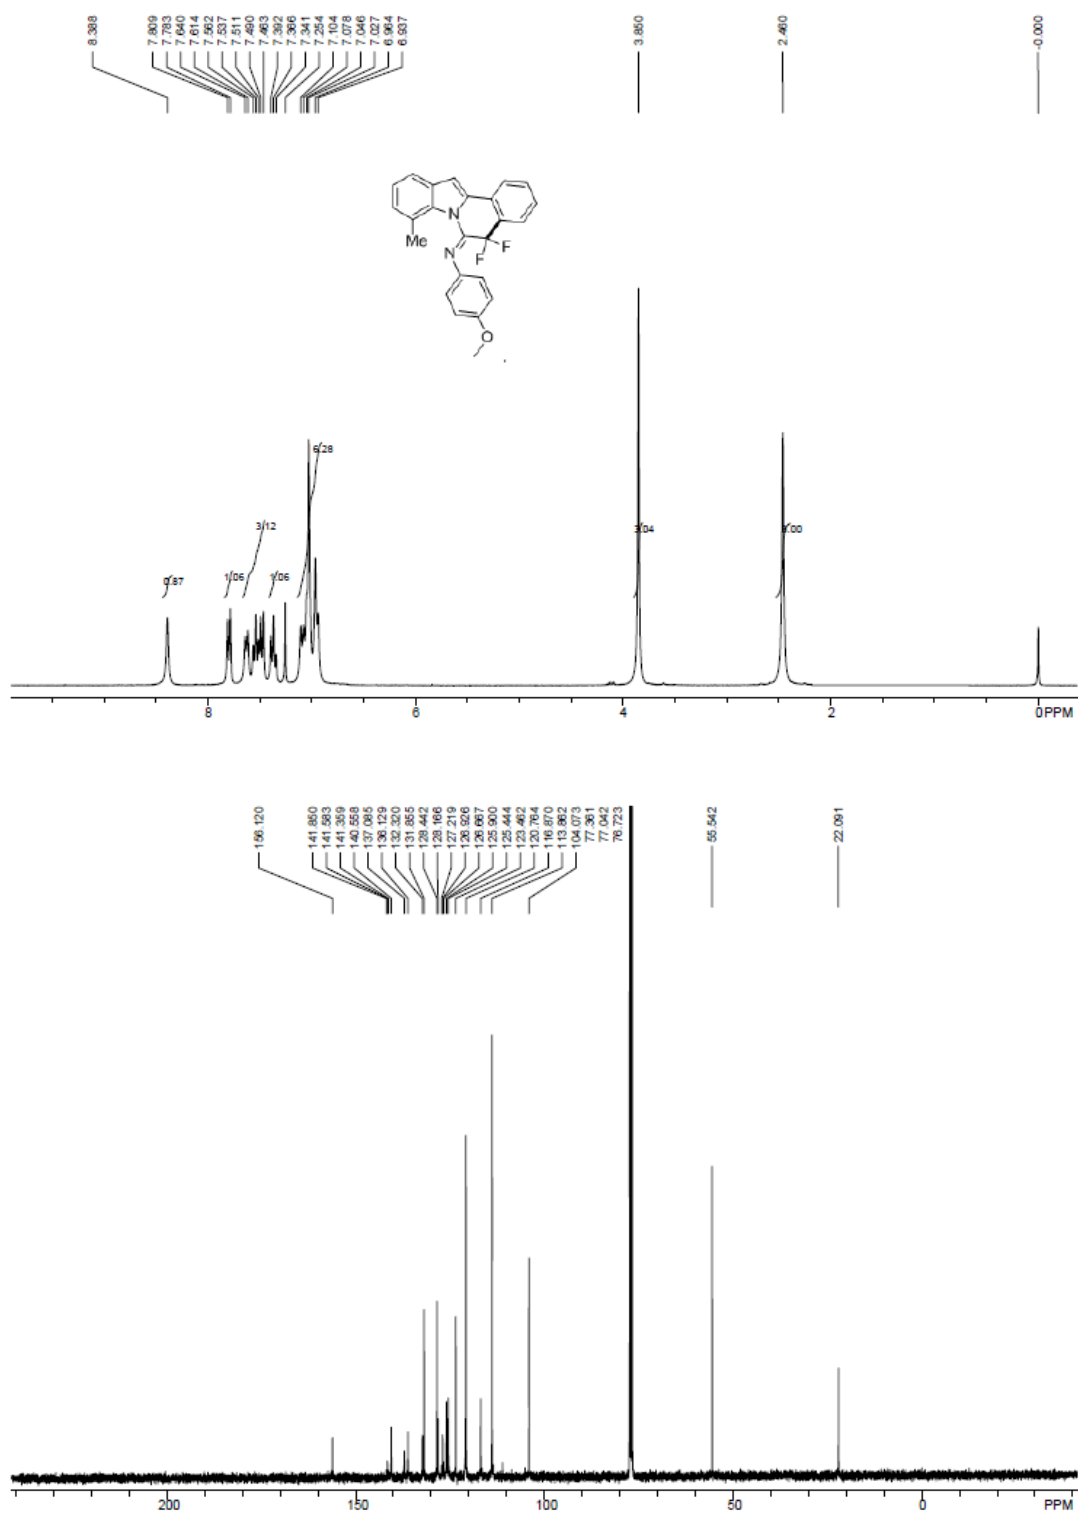

4a

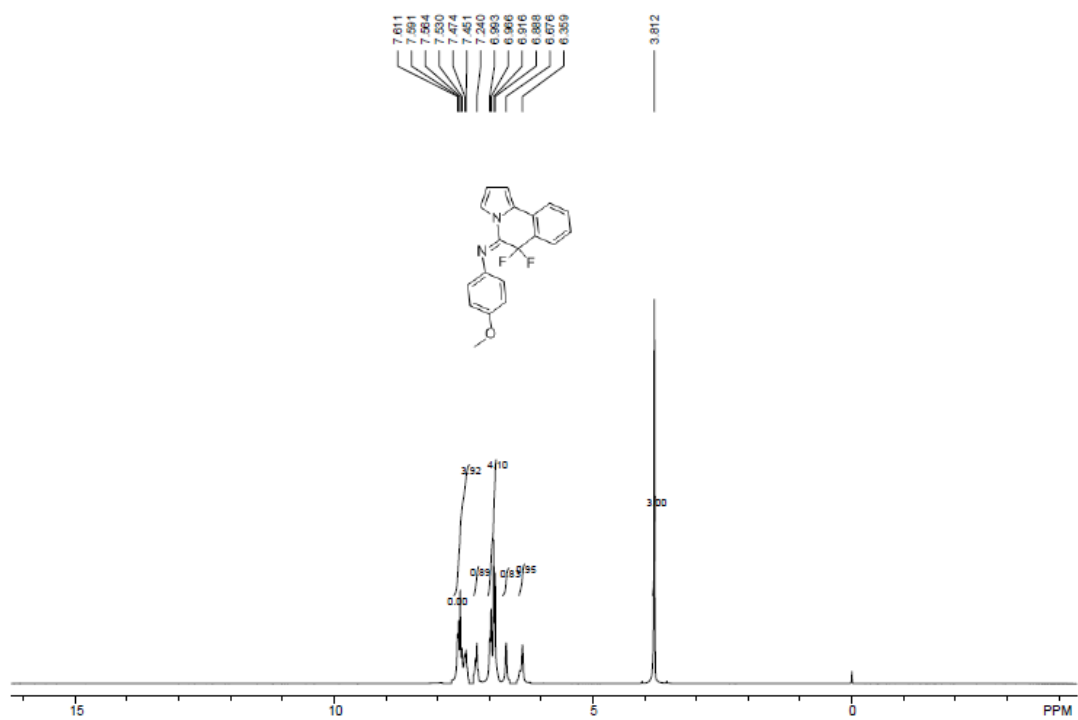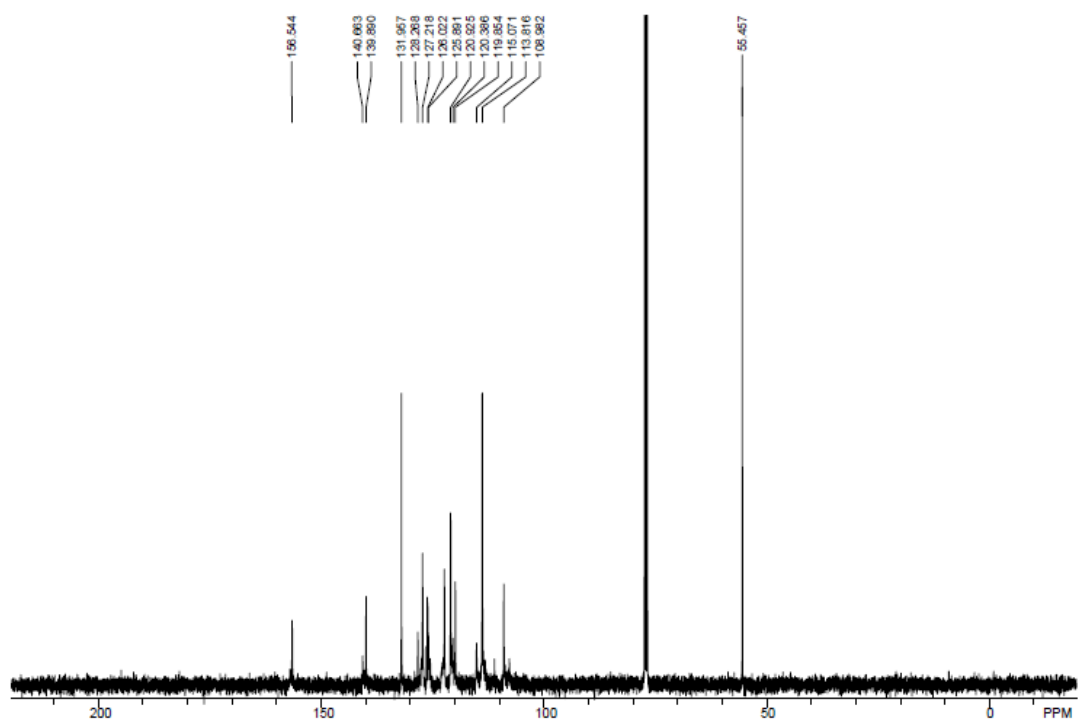

4b

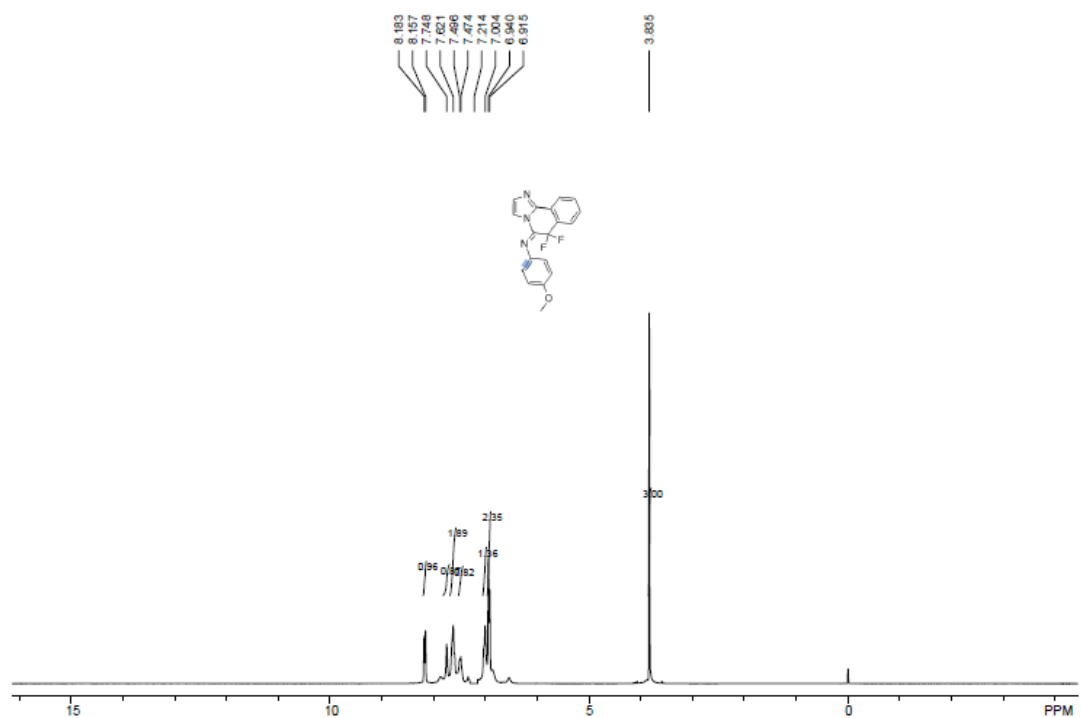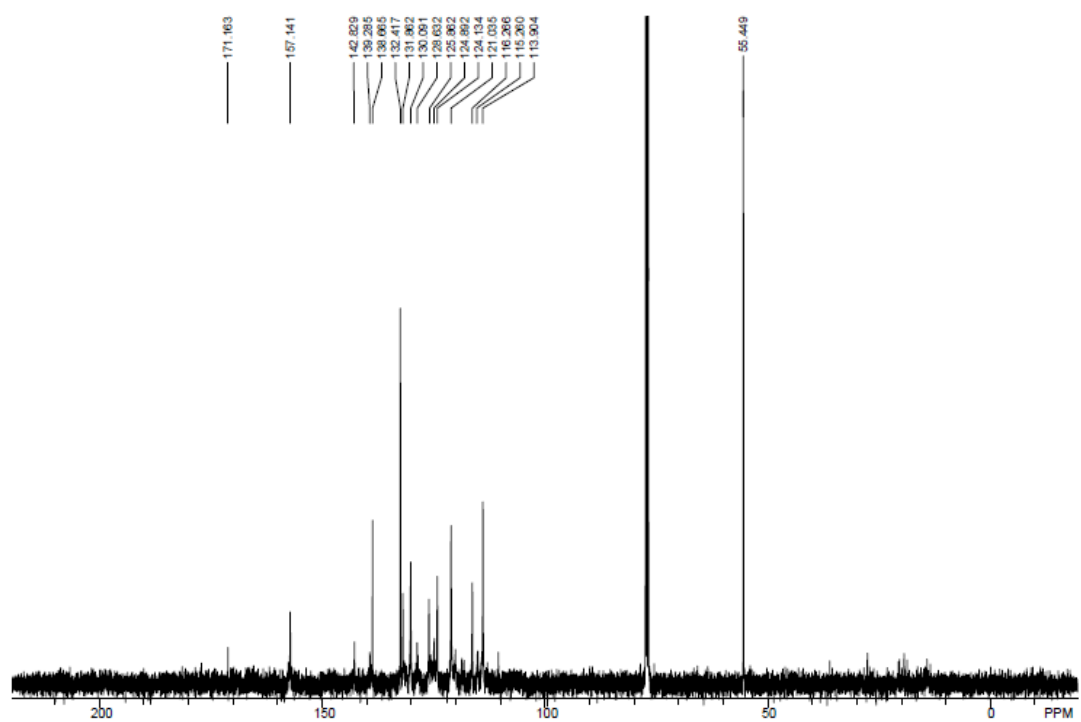

4c

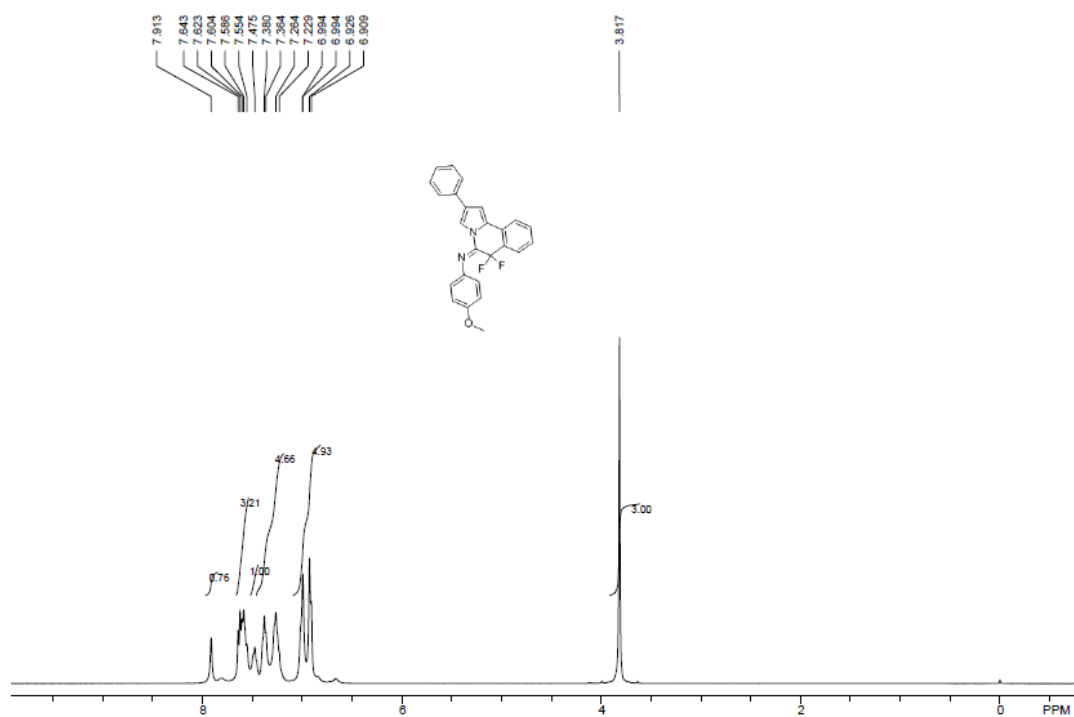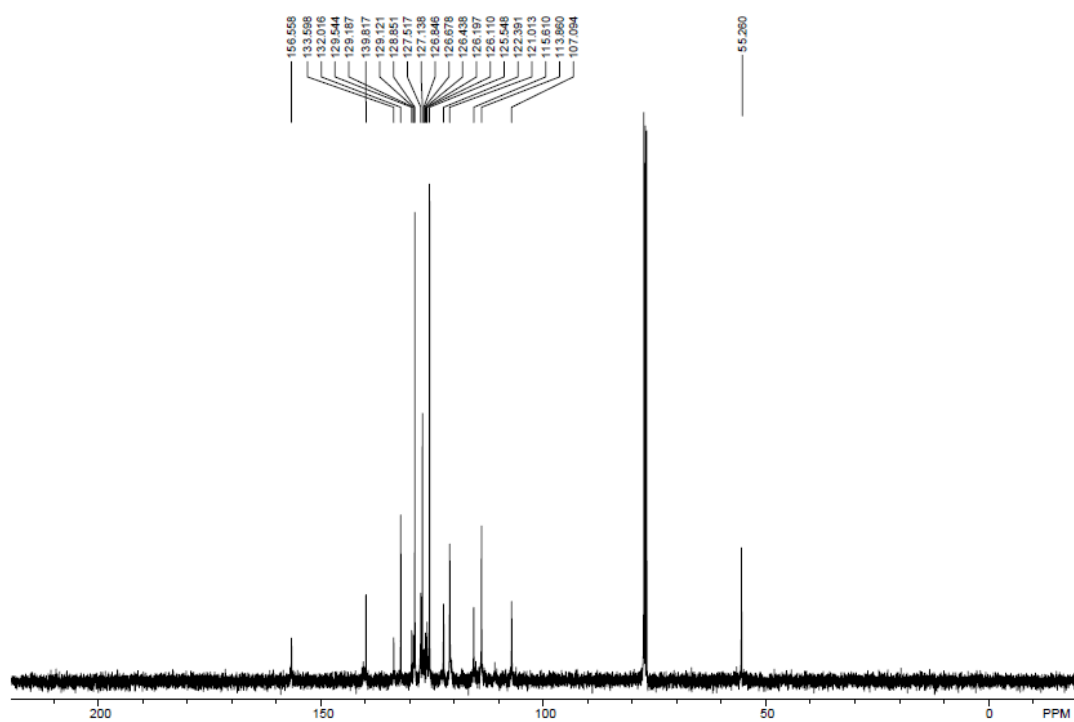

4d

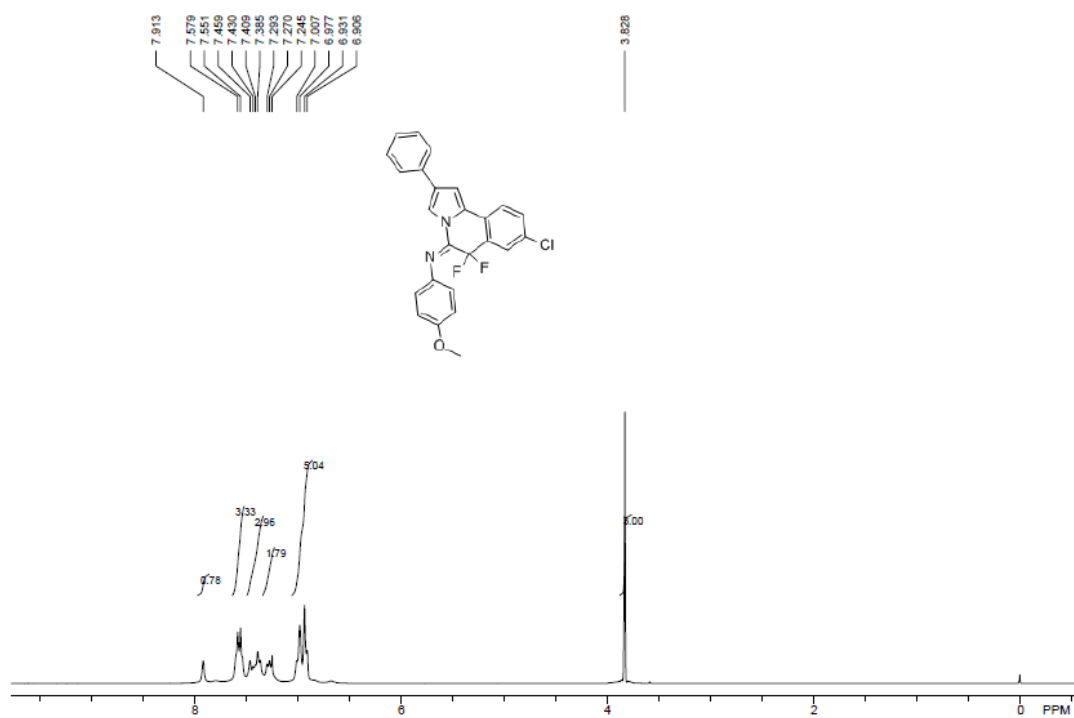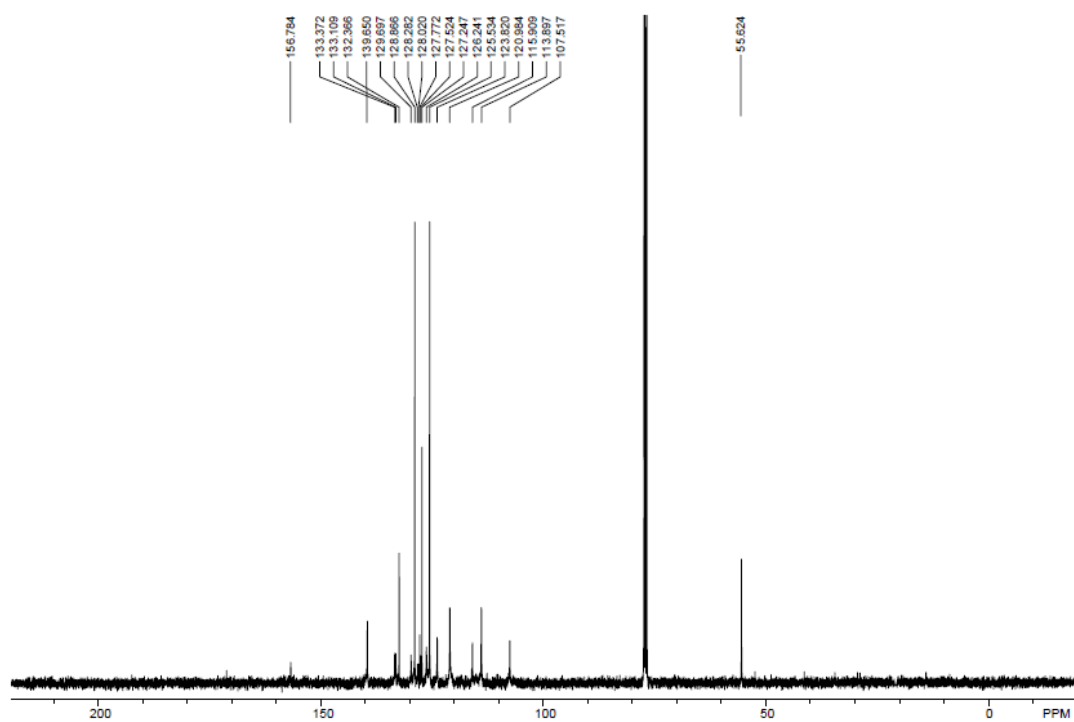

2aa

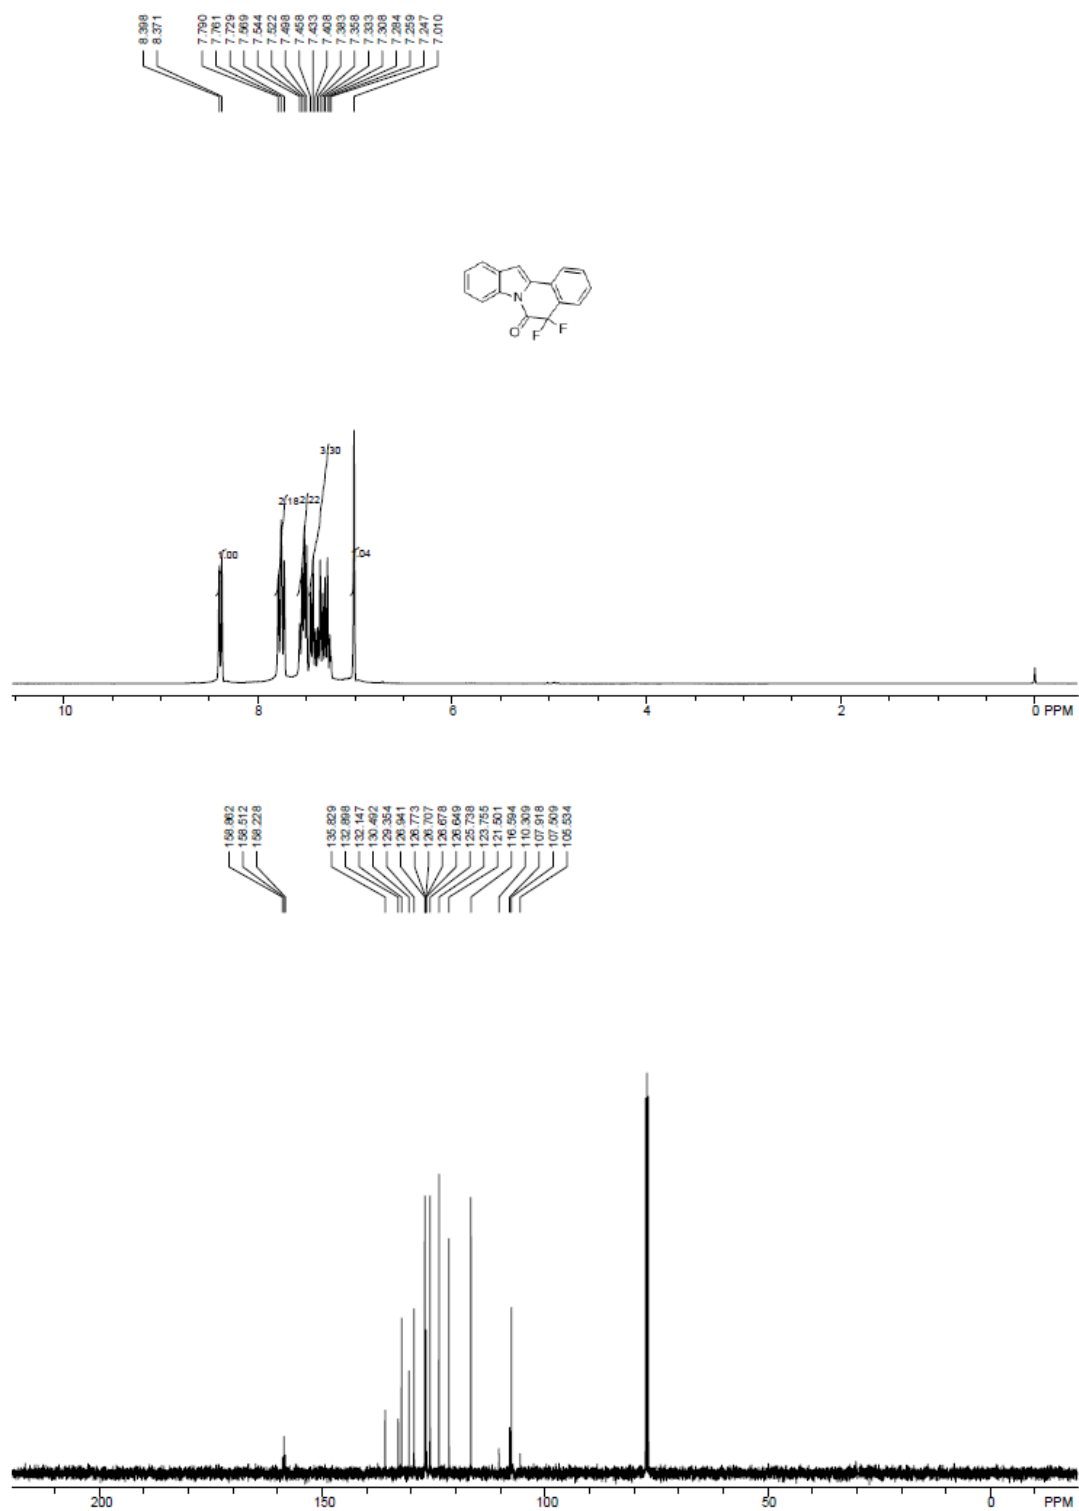



4ea

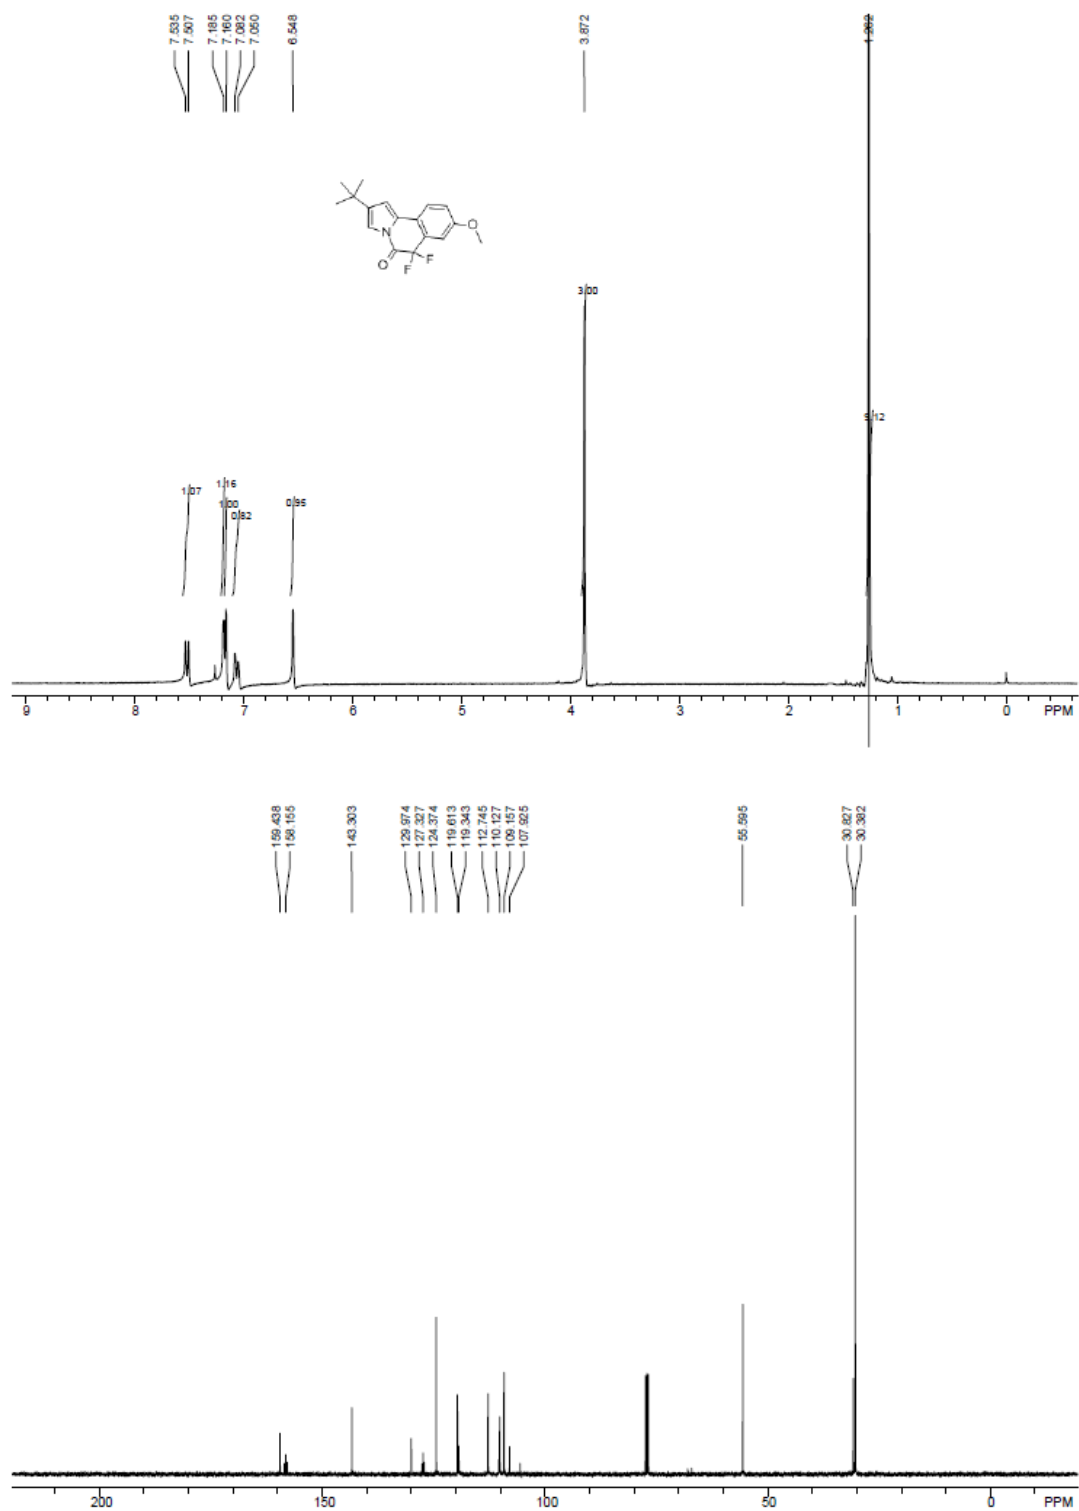

5a

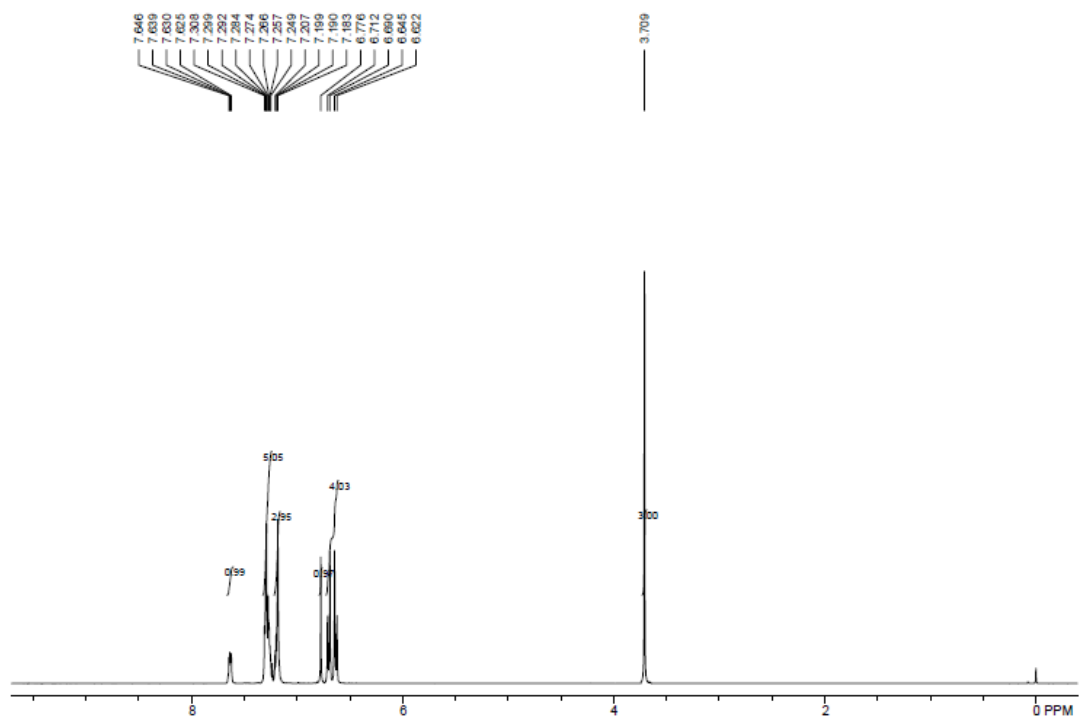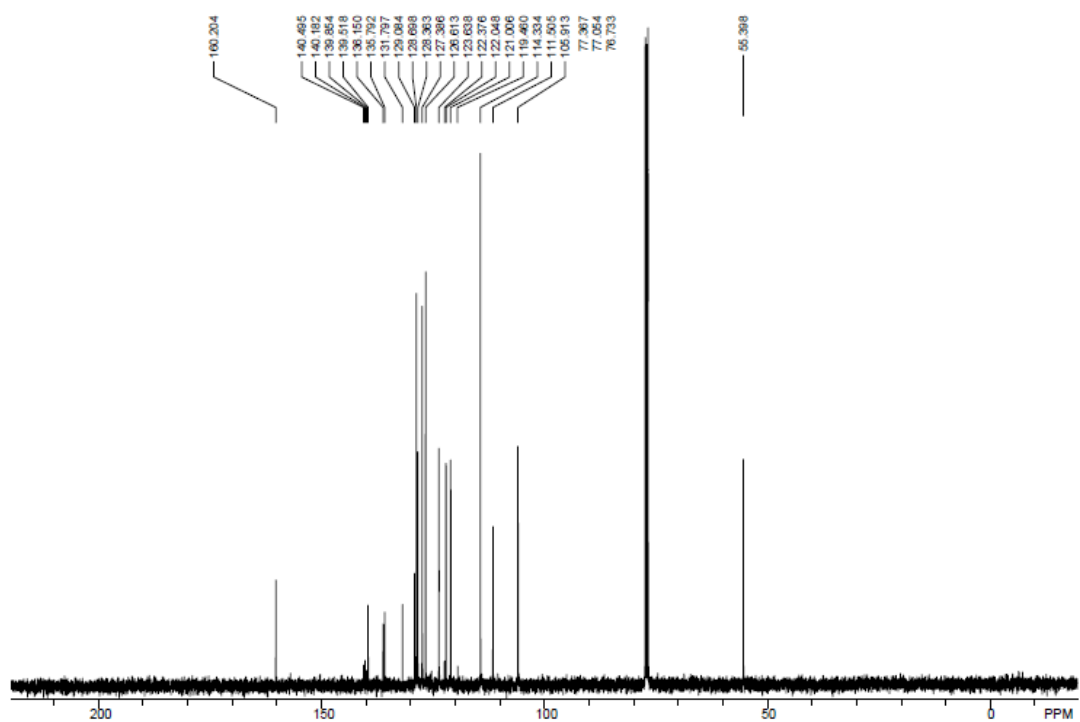

6a

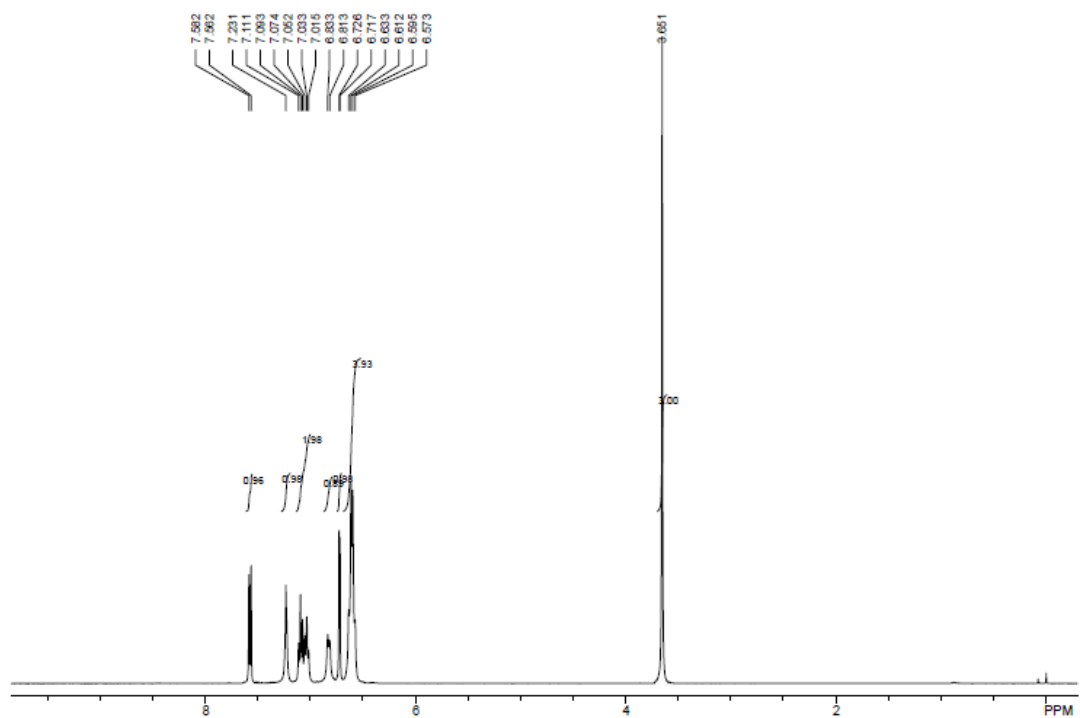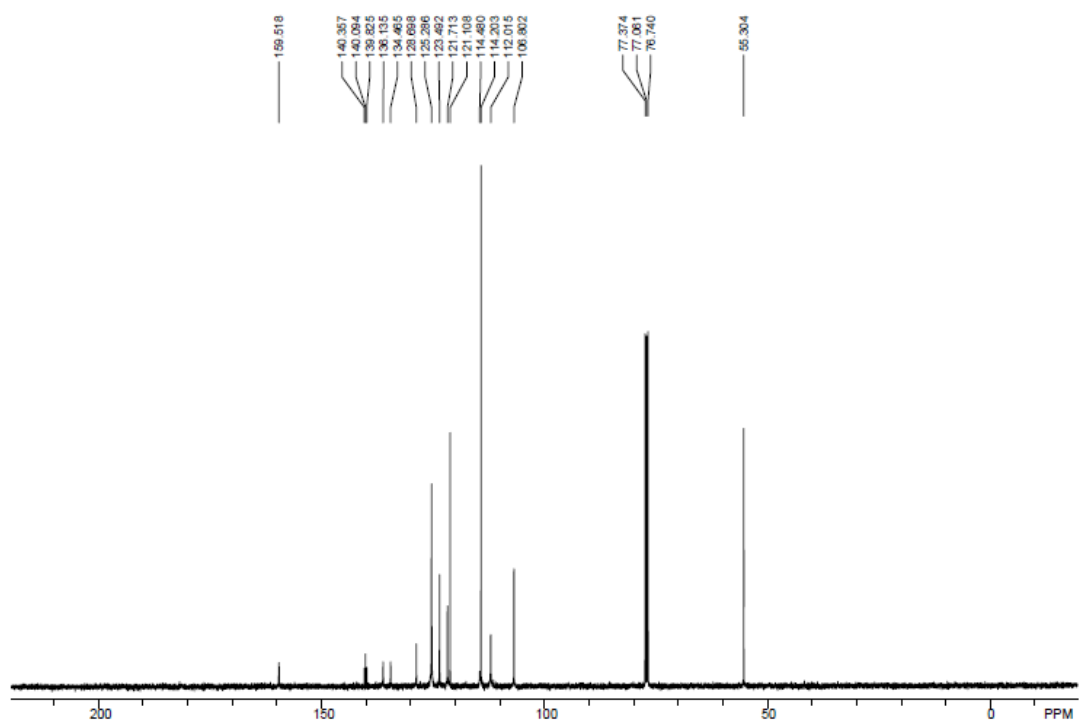

Supplement: c2cc30207a.pdf [file c2cc30207a.pdf]
